# Supplementary material for: Green and Efficient Construction of Chromeno[3,4-c]pyrrole Core via Barton–Zard Reaction from 3-Nitro-2H-chromenes and Ethyl Isocyanoacetate
Source: MDPI journal article supplement (doi:10.3390/molecules27238456), 2022-12-02

*Supporting information for*

**Green and efficient construction of chromeno[3,4-*c*]pyrrole core *via*  
Barton-Zard reaction from 3-nitro-2*H*-chromenes and  
ethyl isocyanoacetate**

Ivan A. Kochnev, Alexey Y. Barkov, Nikolay S. Zimnitskiy, Vladislav Y. Korotaev\* and  
Vyacheslav Y. Sosnovskikh\*

Institute of Natural Sciences and Mathematics, Ural Federal University, 51 Lenina Ave.,  
620000 Ekaterinburg, Russian Federation

E-mail: [korotev.vladislav@urfu.ru](mailto:korotev.vladislav@urfu.ru), [vy.sosnovskikh@urfu.ru](mailto:vy.sosnovskikh@urfu.ru)

**Table of Contents**

|                                                                                    |        |
|------------------------------------------------------------------------------------|--------|
| 1. Copies of $^1\text{H}$ and $^{13}\text{C}$ NMR spectra of synthesized compounds | S2–S32 |
|------------------------------------------------------------------------------------|--------|

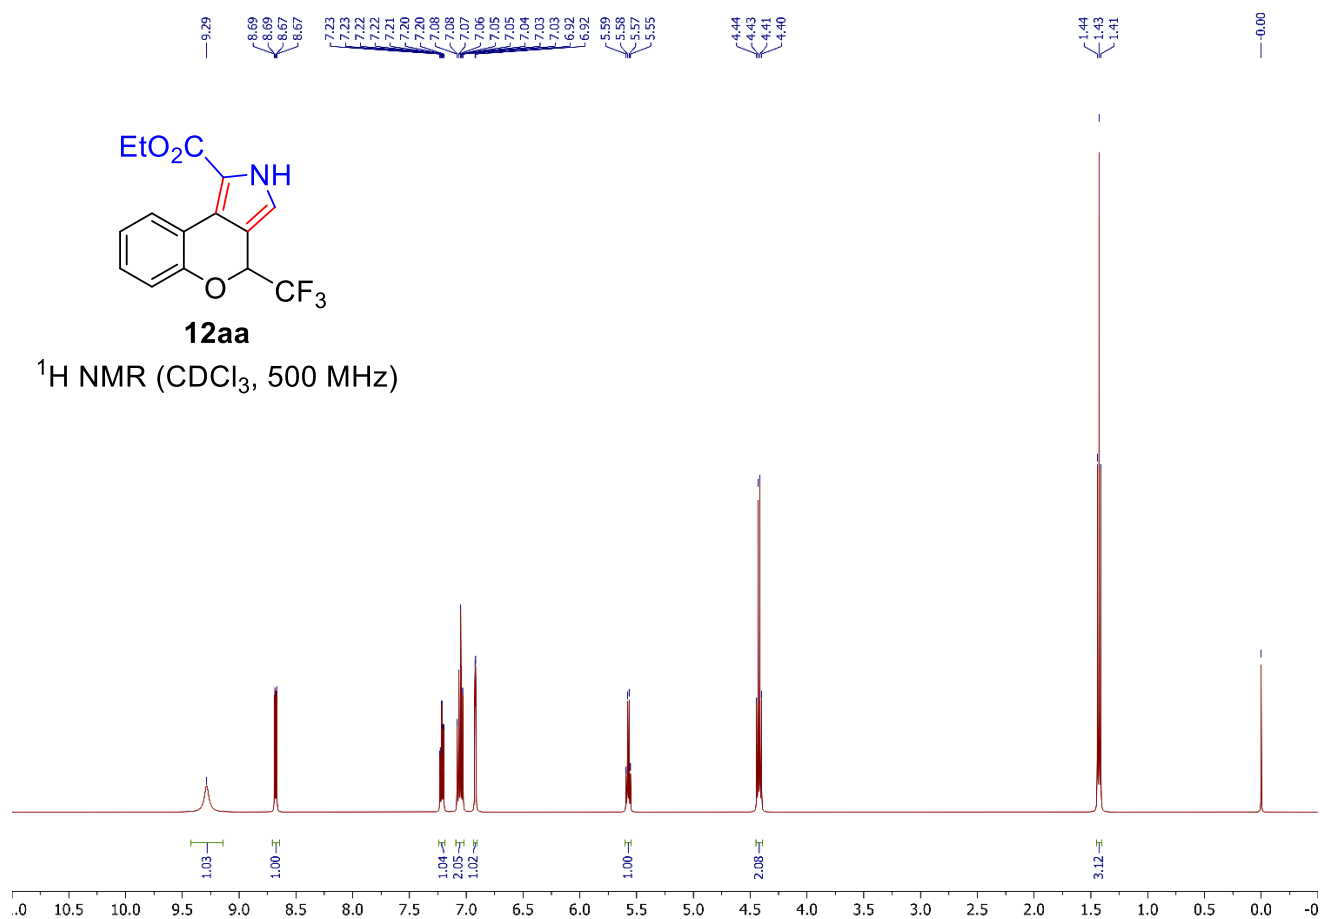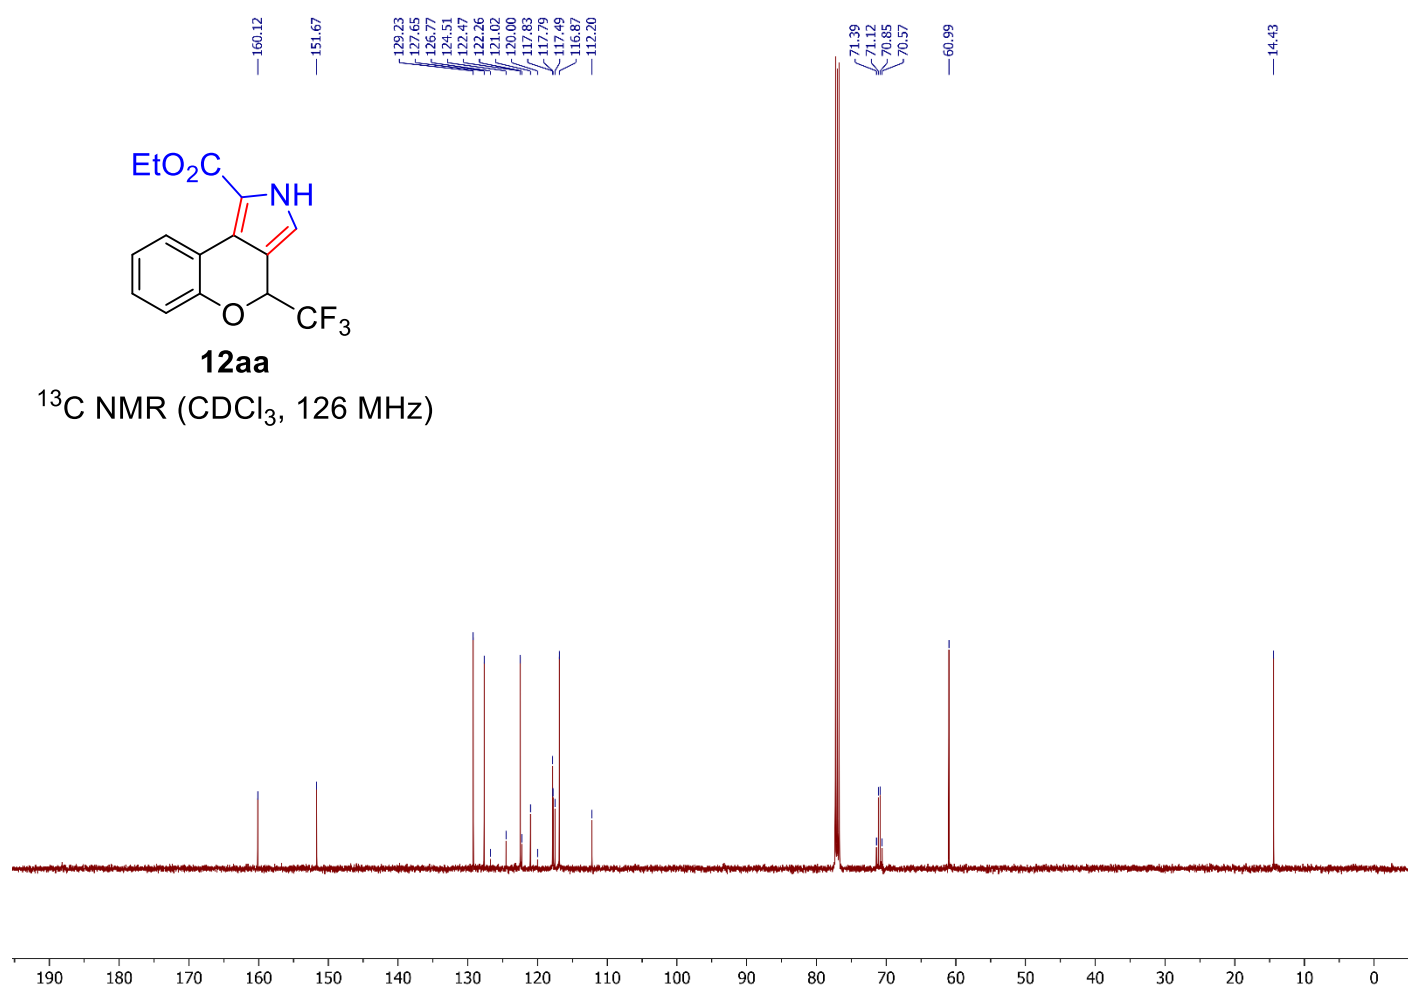

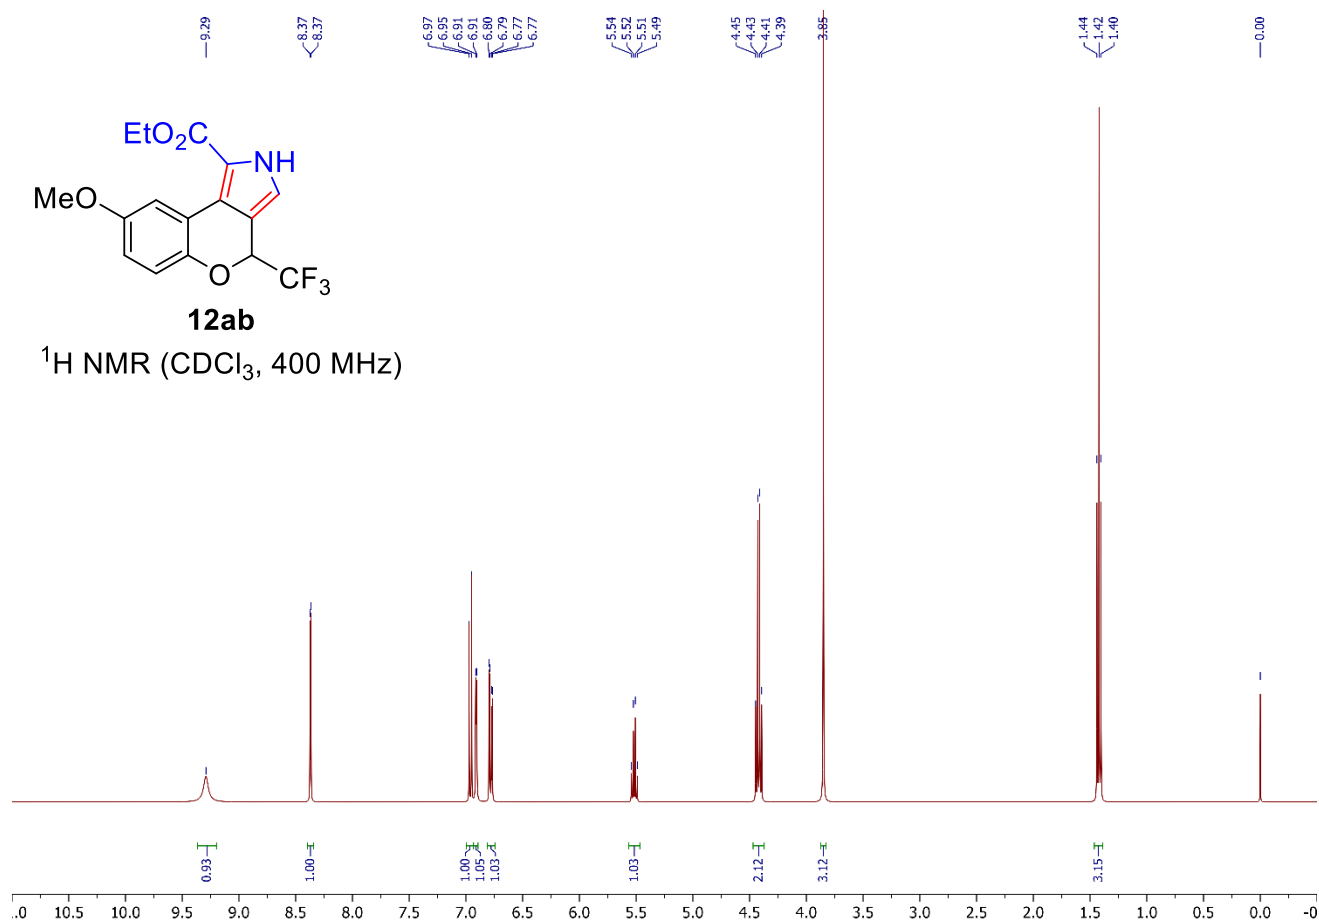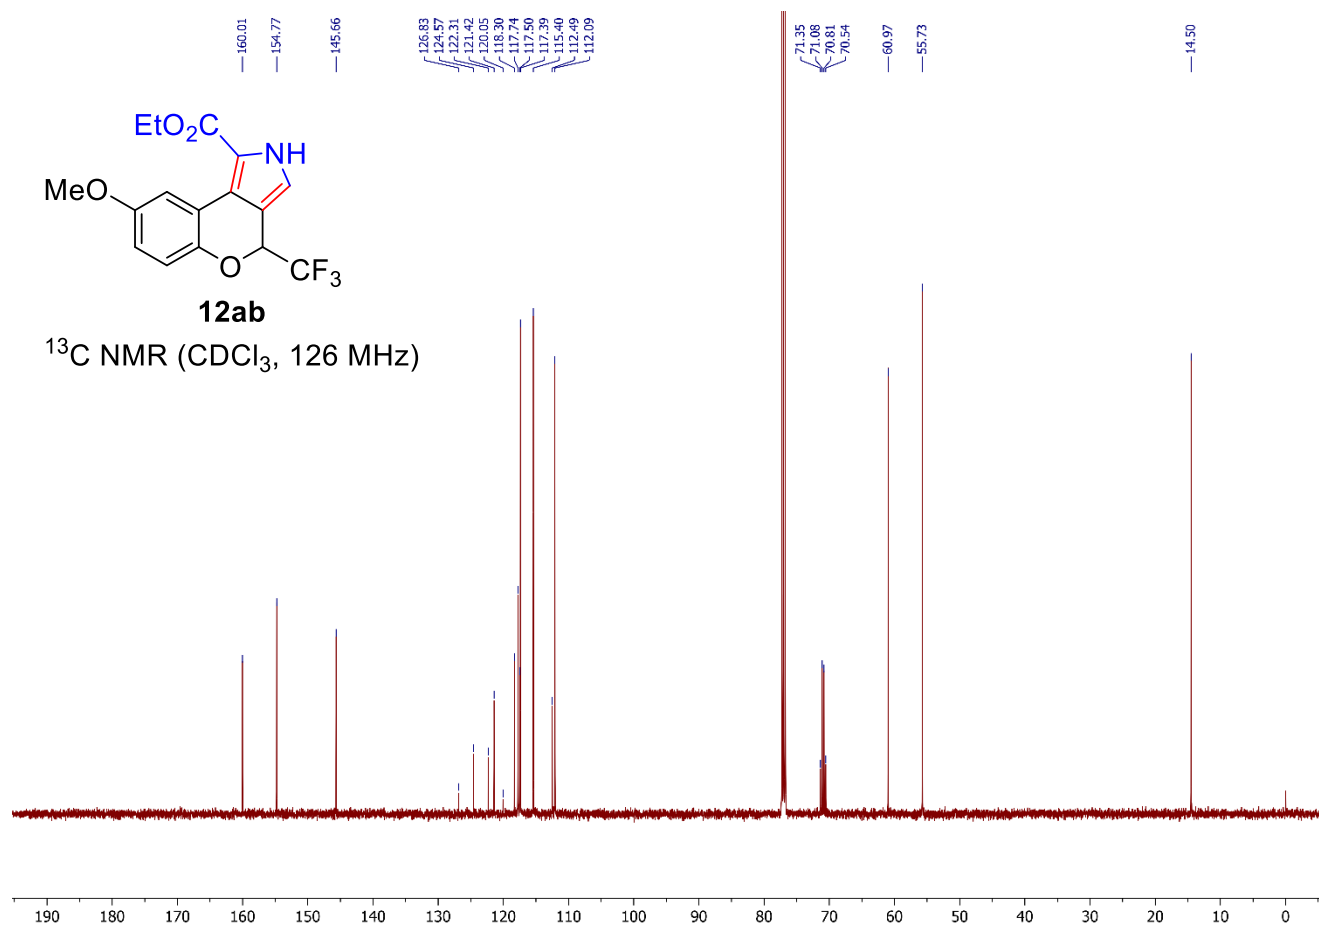

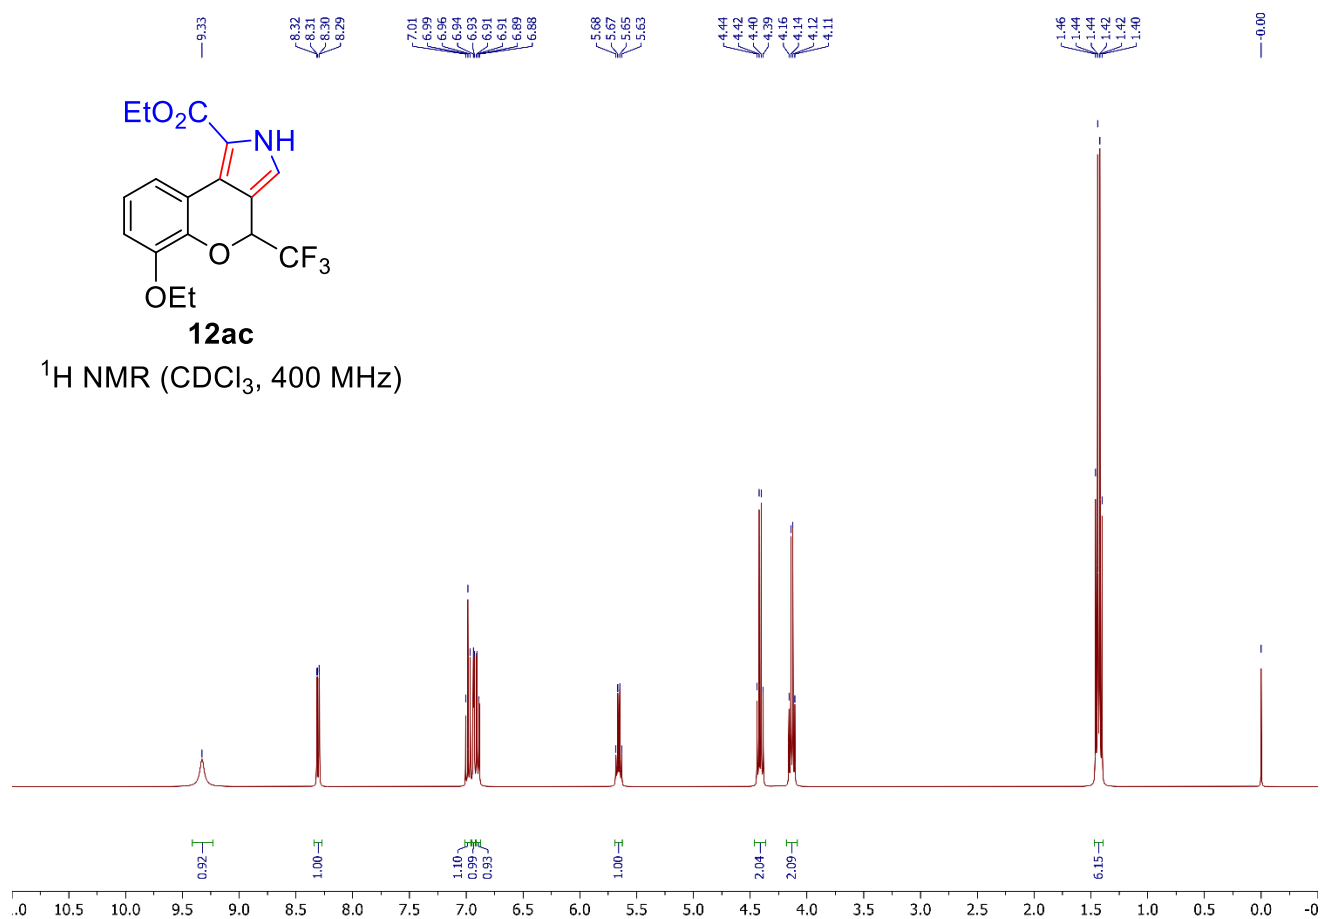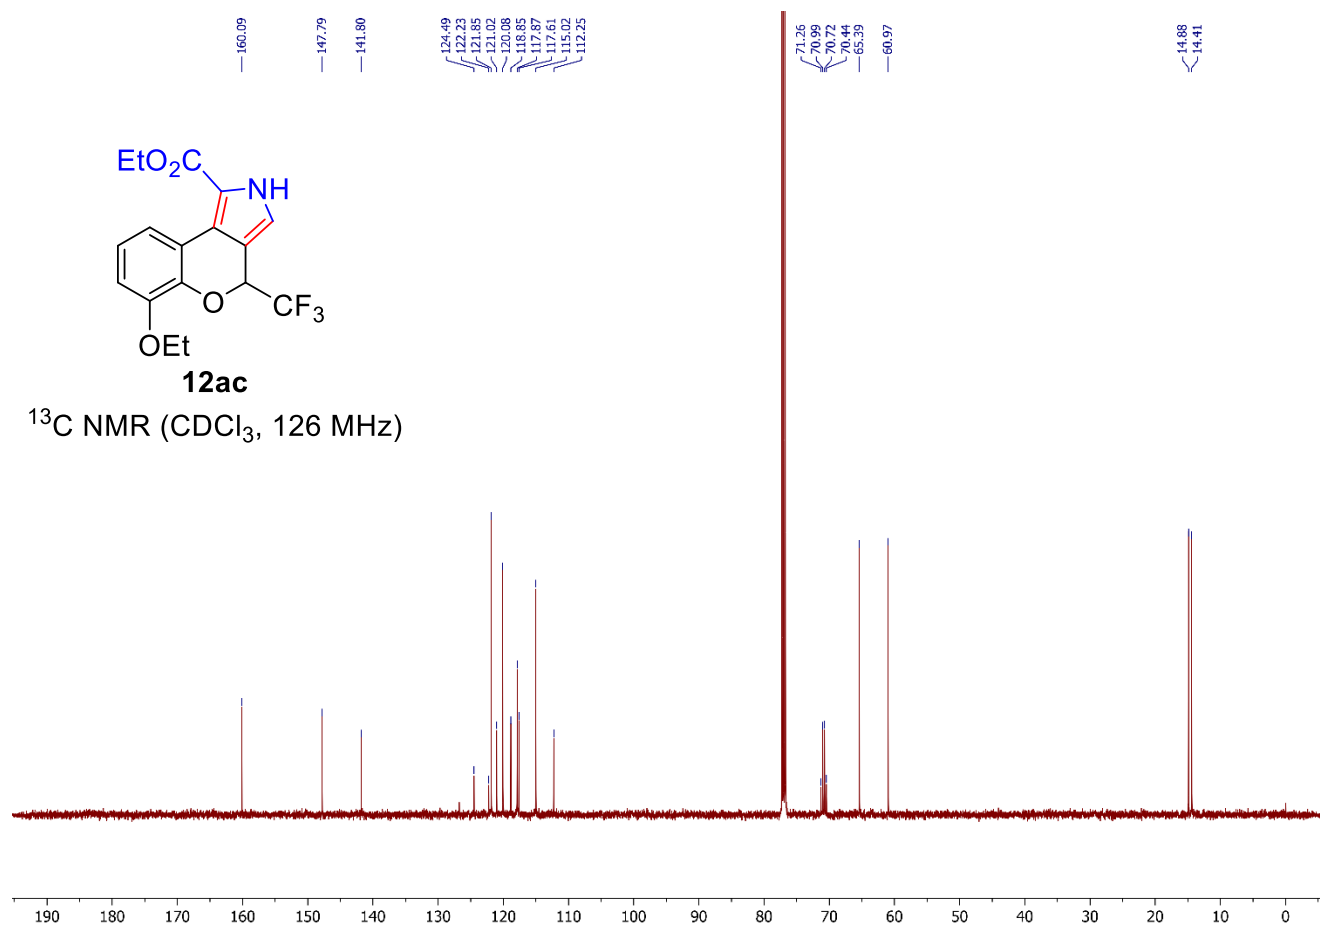

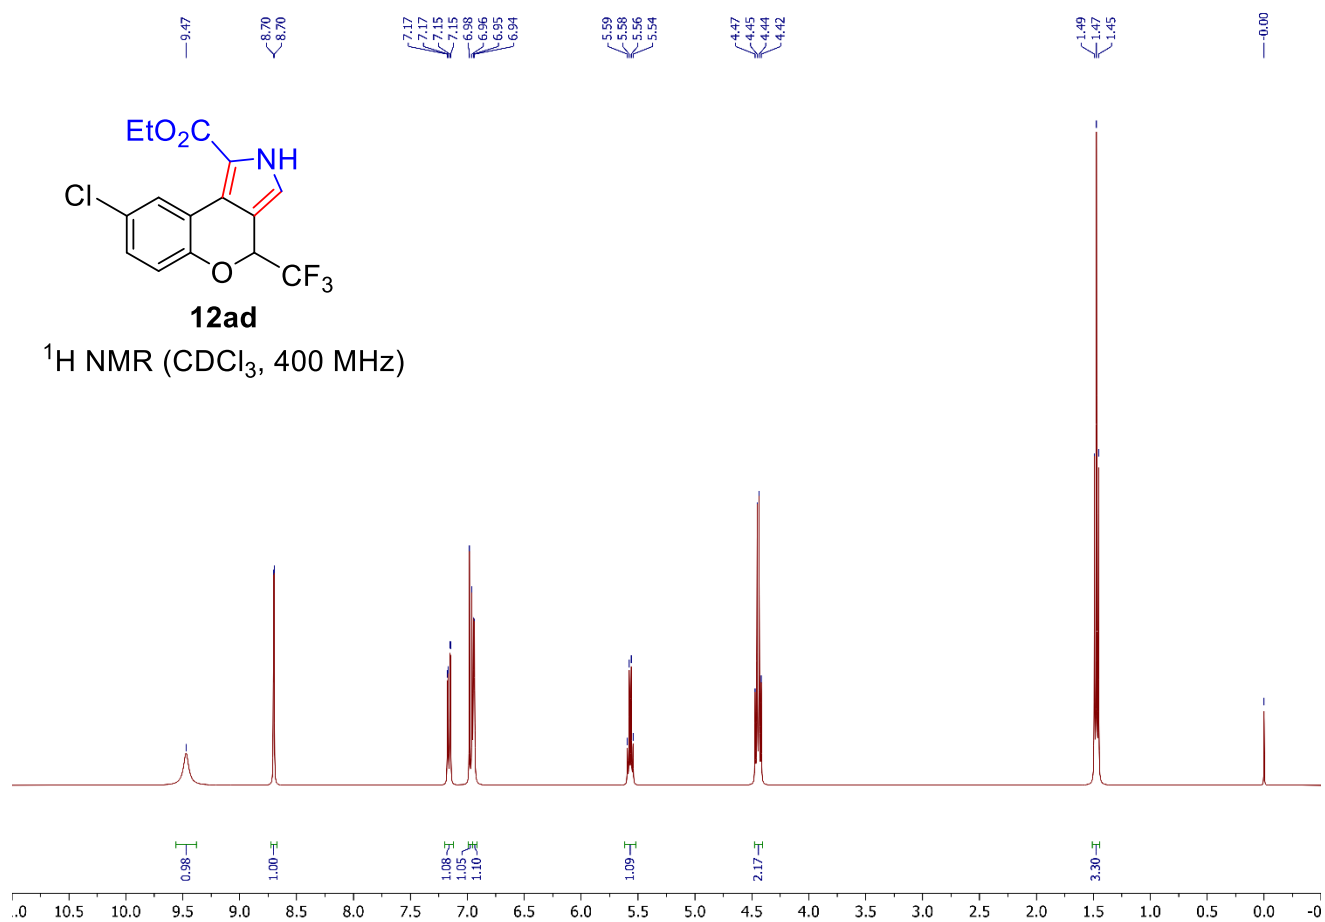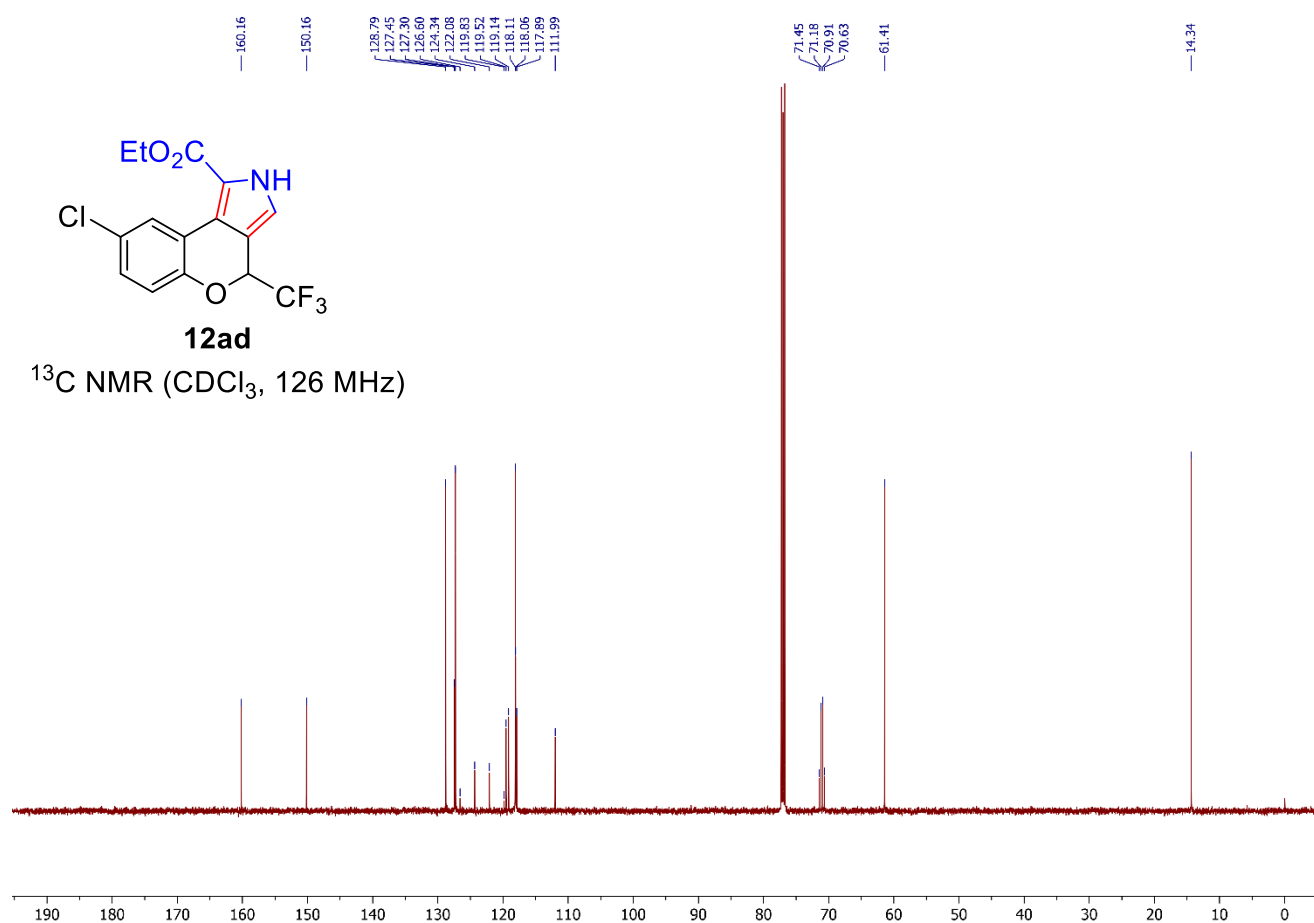

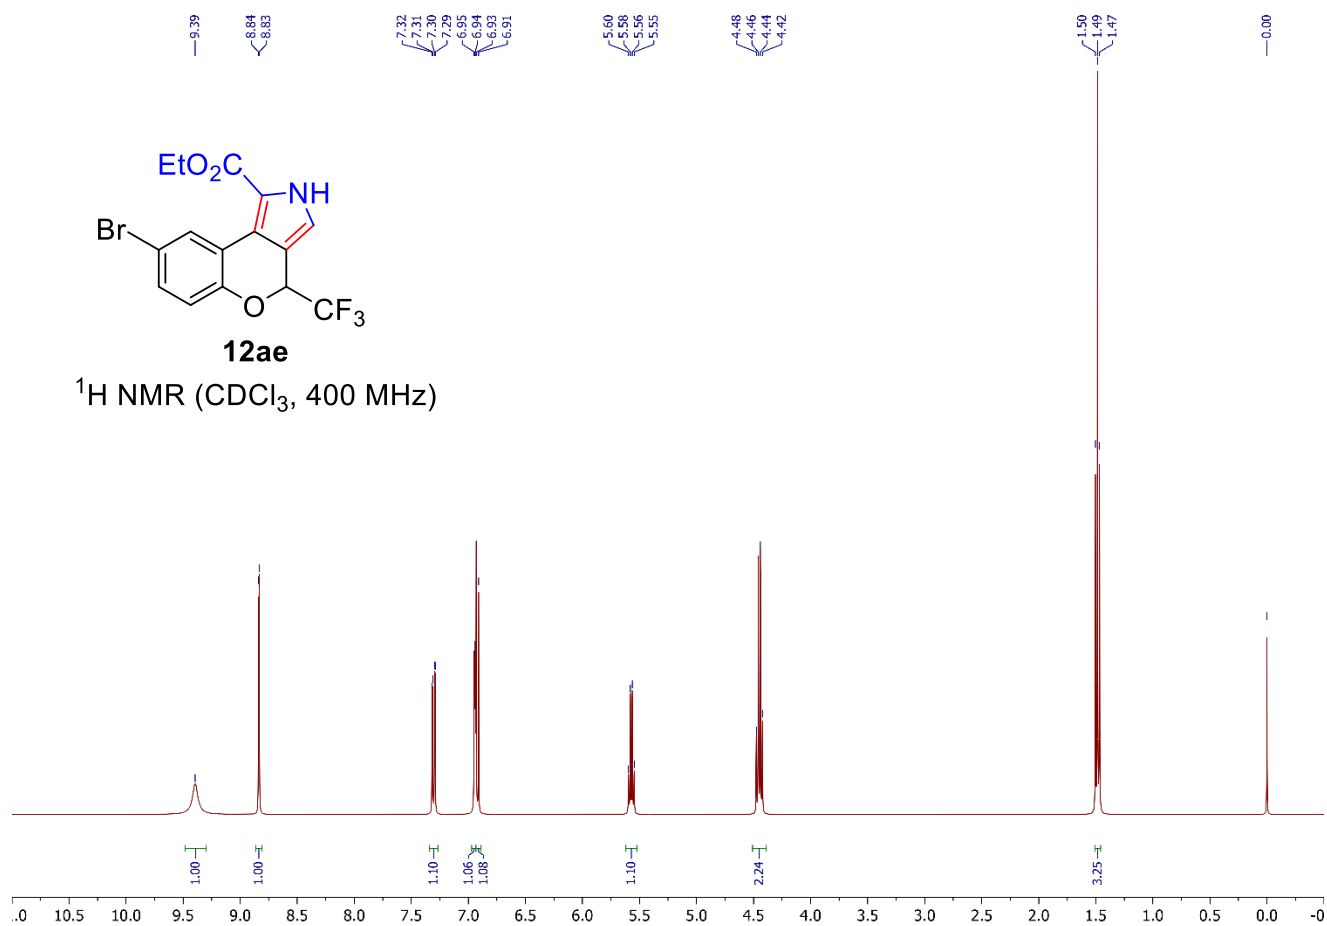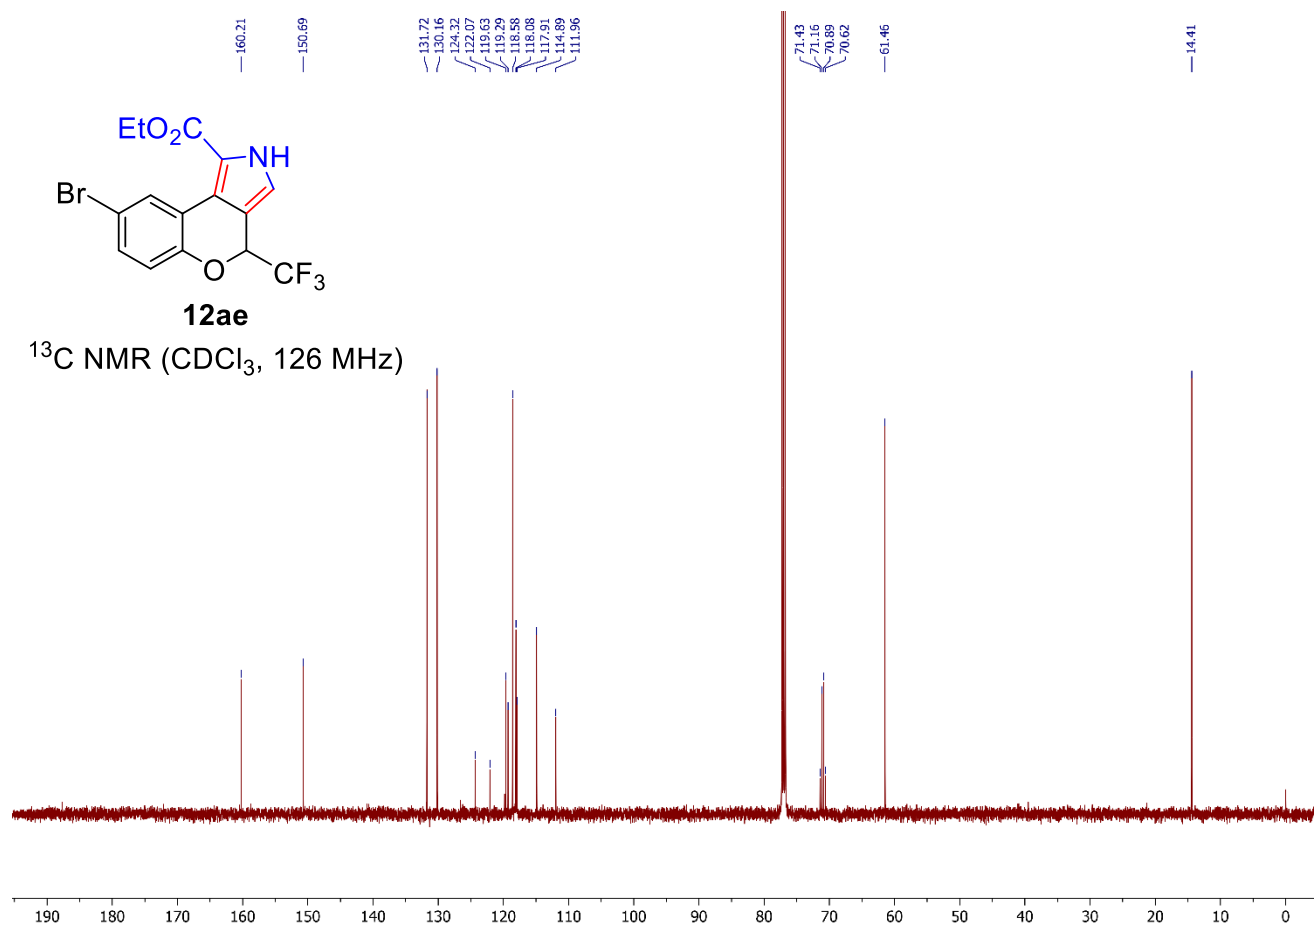

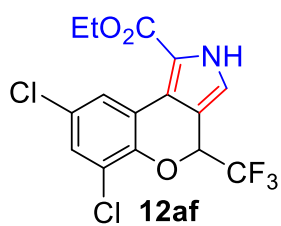

$^1\text{H}$  NMR ( $\text{CDCl}_3$ , 400 MHz)

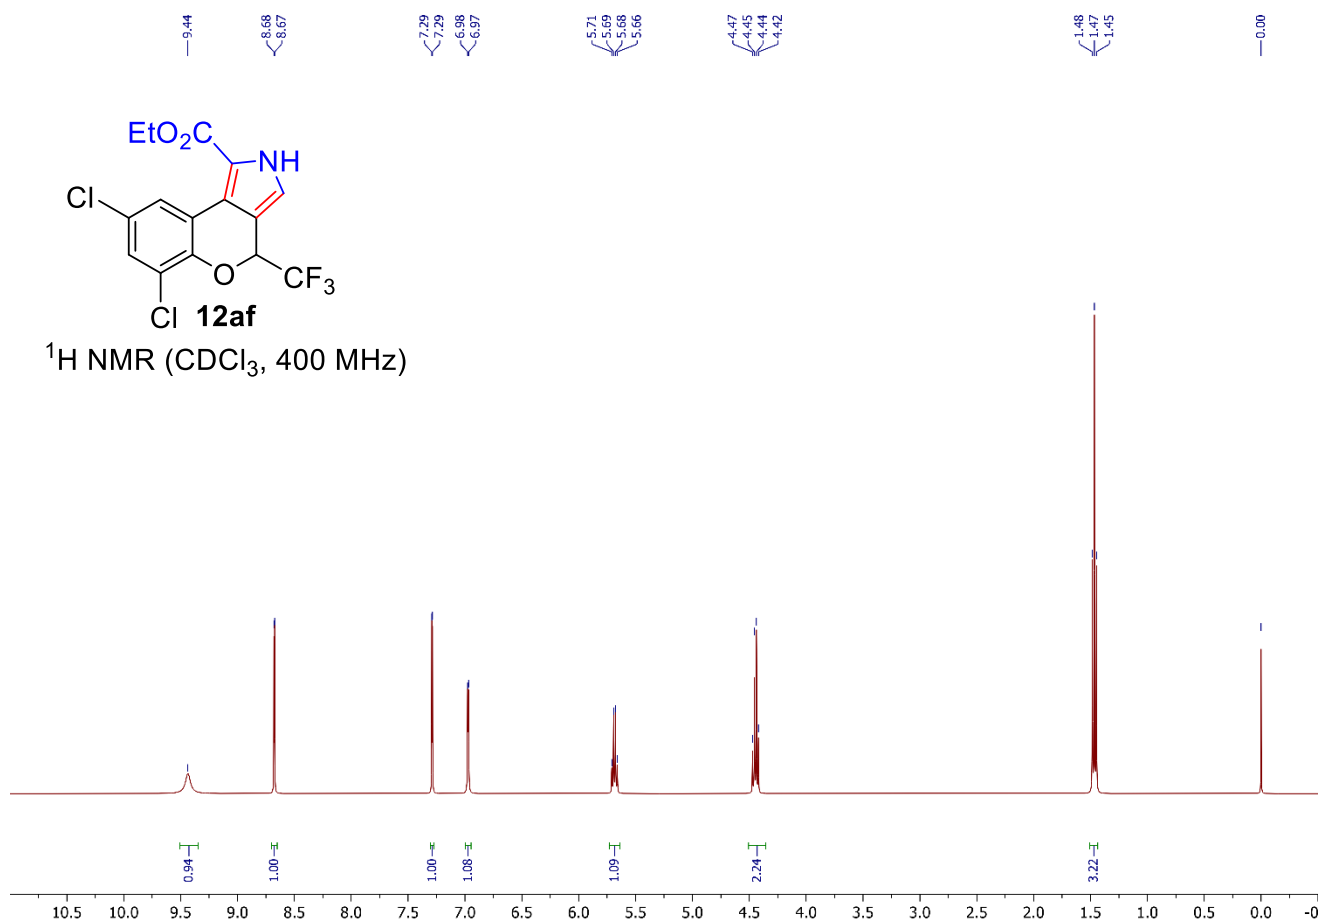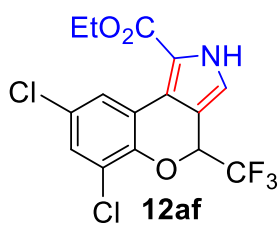

$^{13}\text{C}$  NMR ( $\text{CDCl}_3$ , 126 MHz)

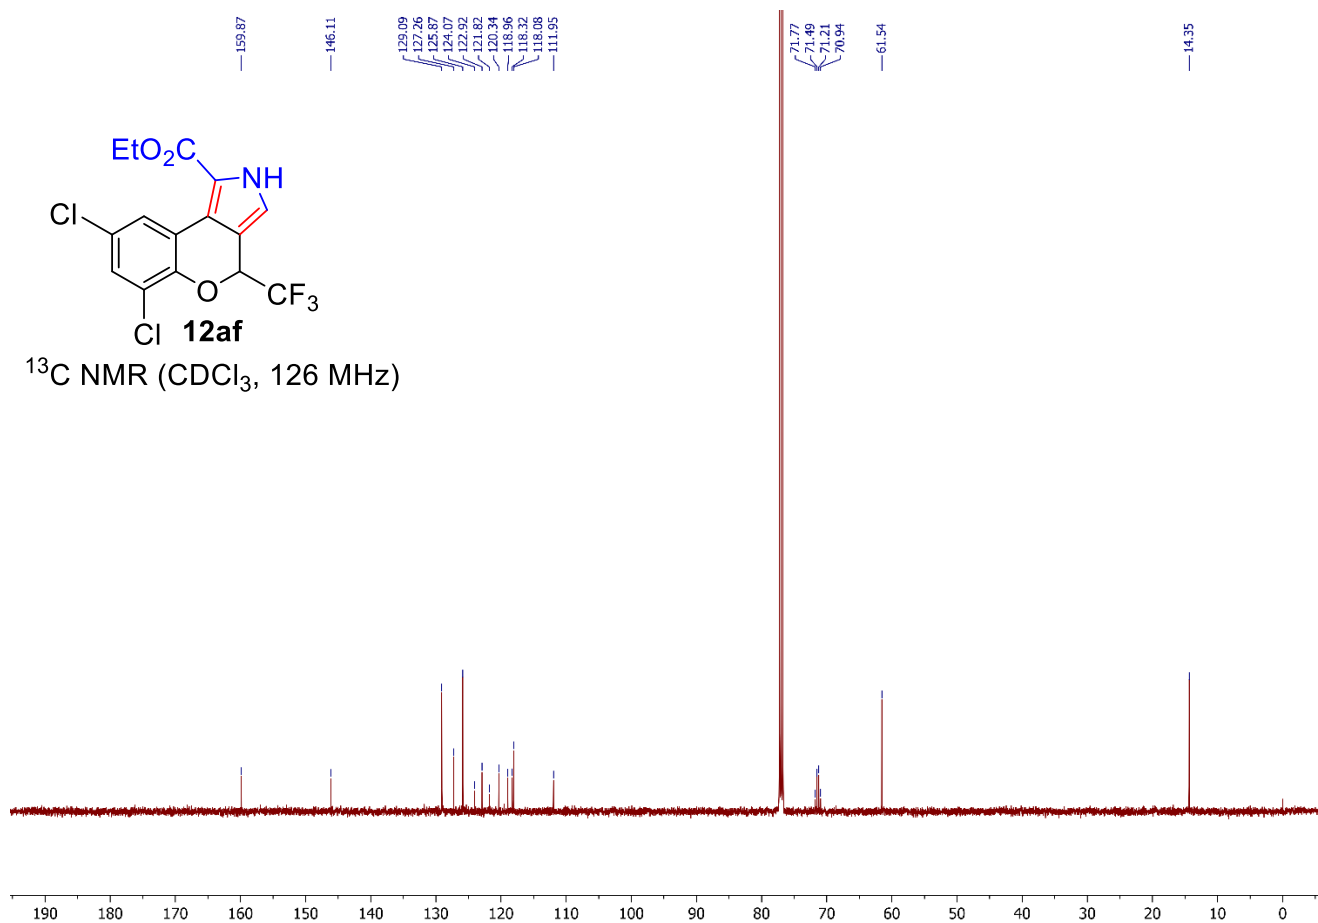

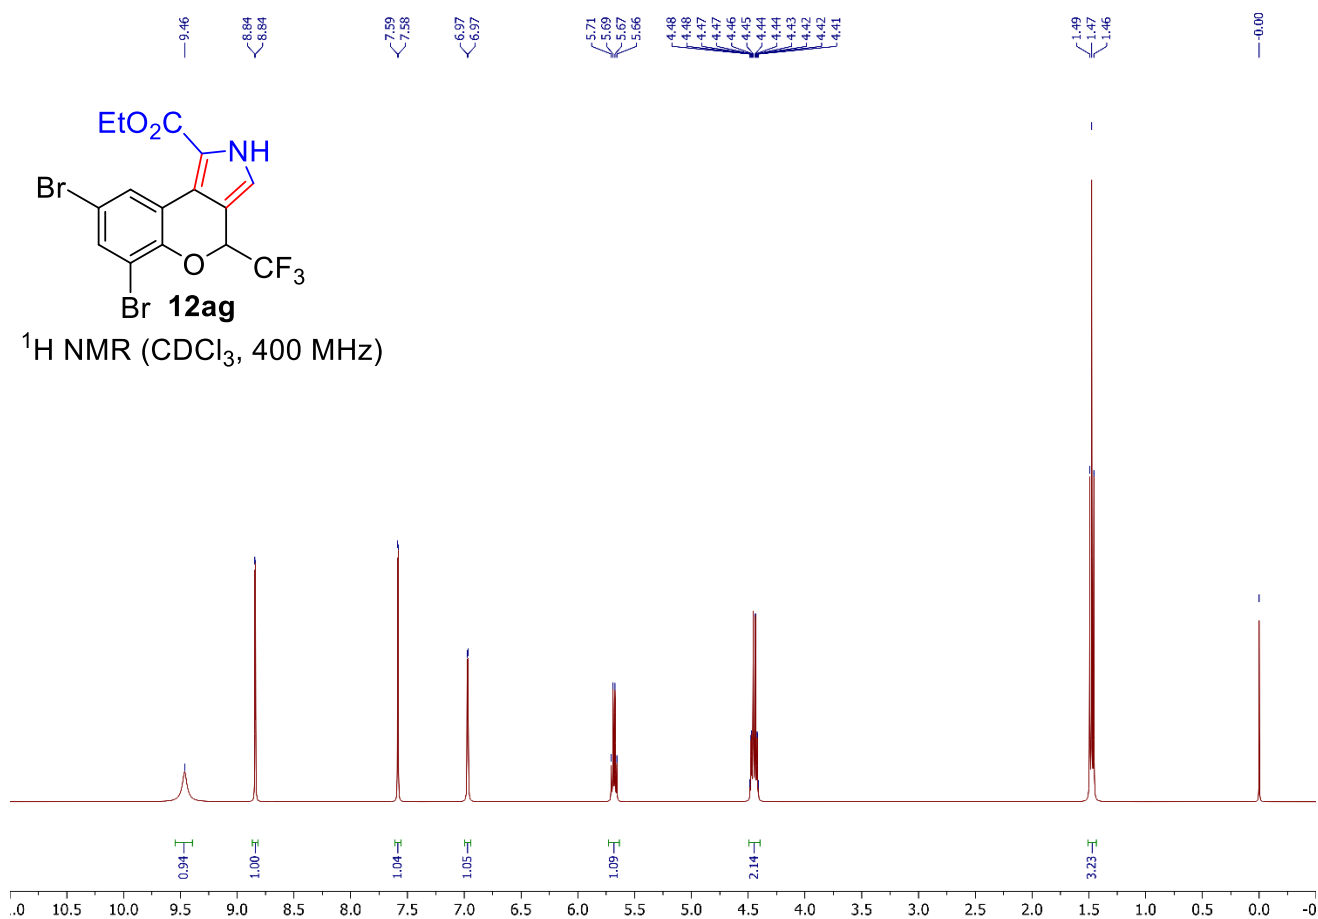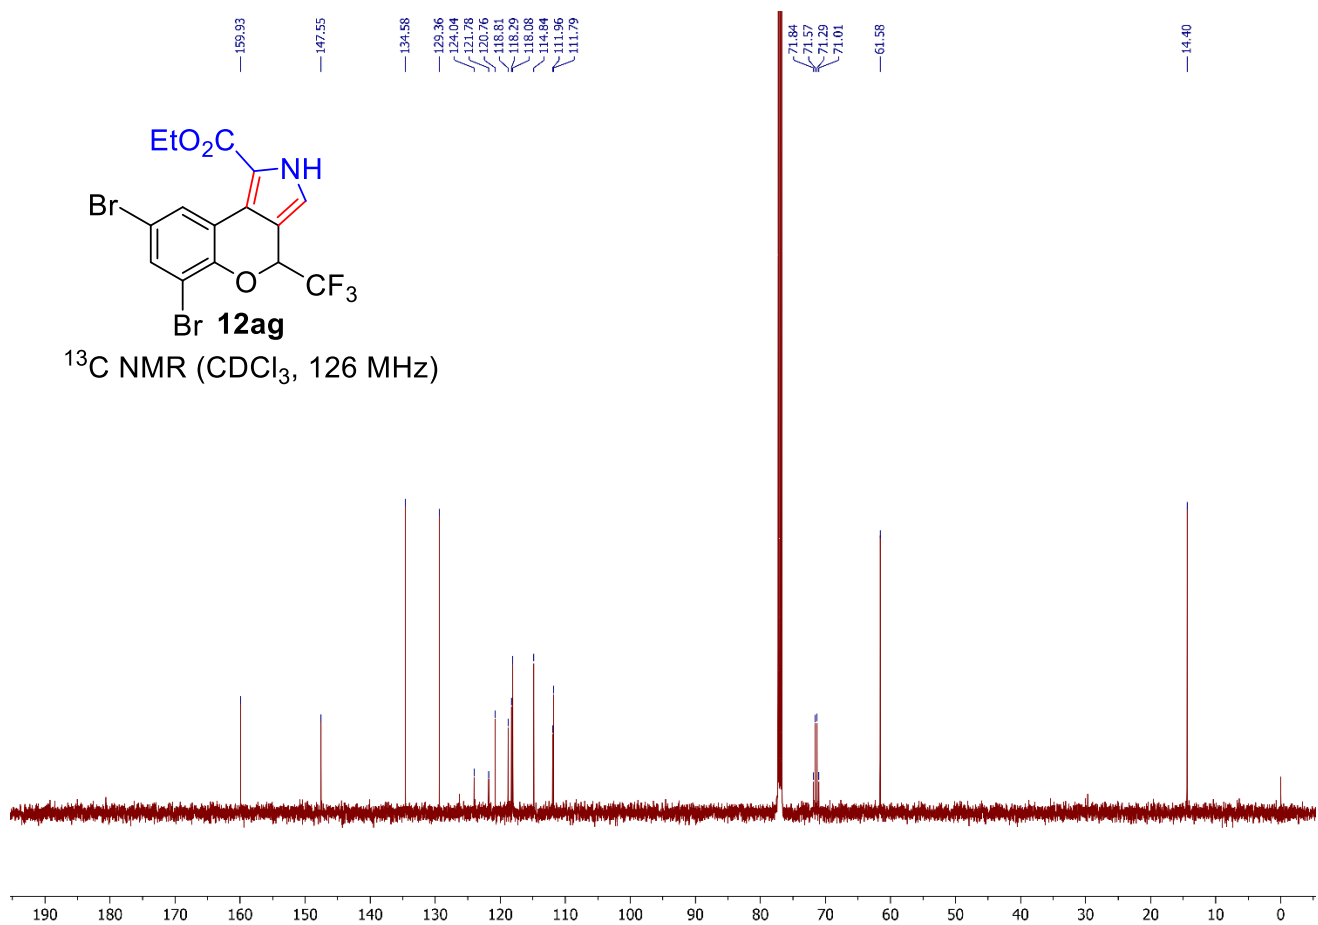



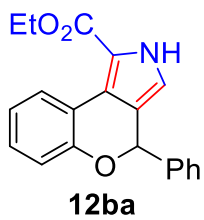

$^1\text{H}$  NMR ( $\text{CDCl}_3$ , 400 MHz)

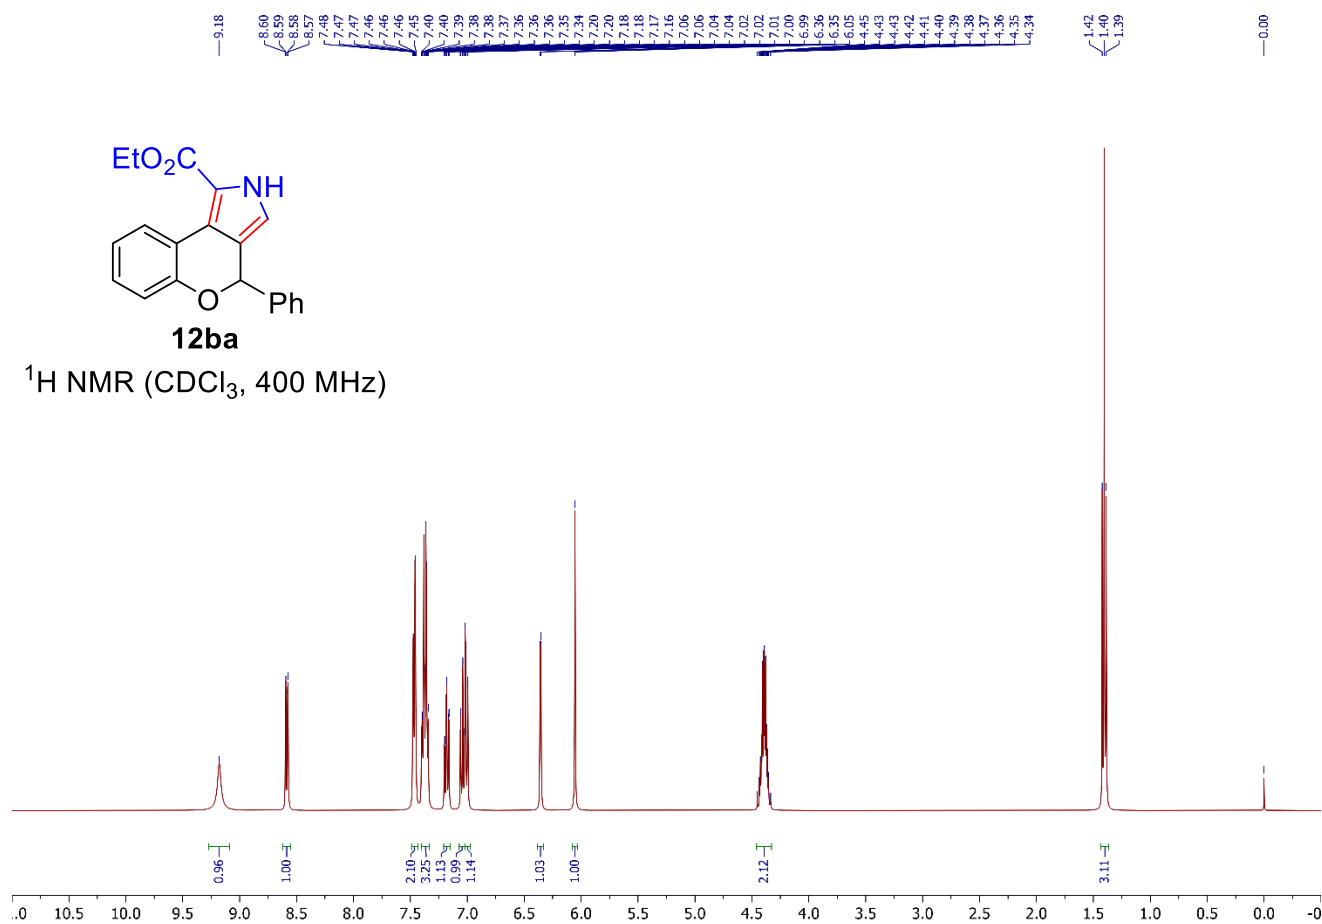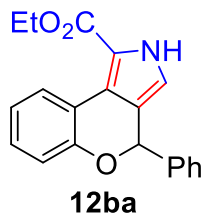

$^{13}\text{C}$  NMR ( $\text{CDCl}_3$ , 126 MHz)

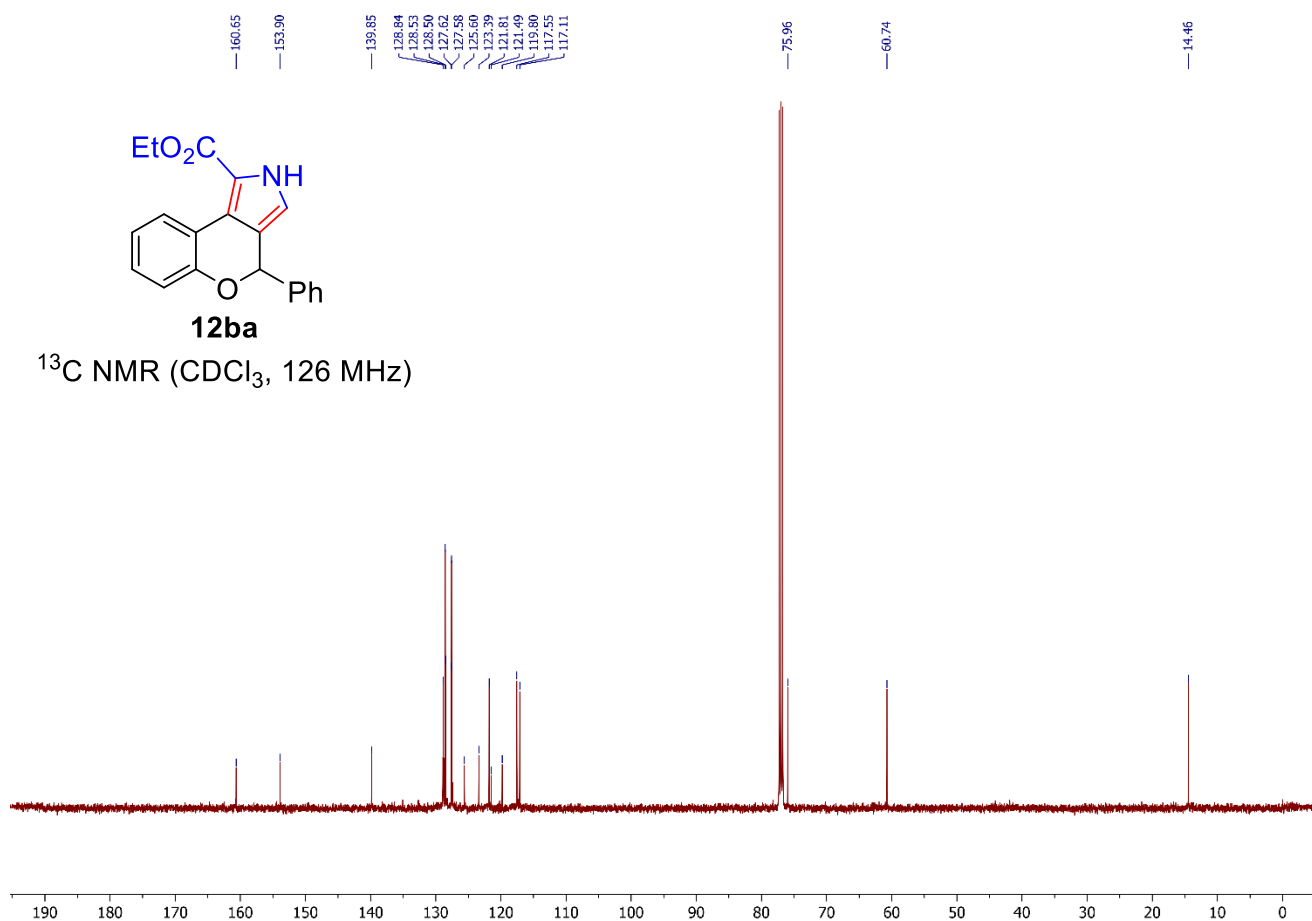

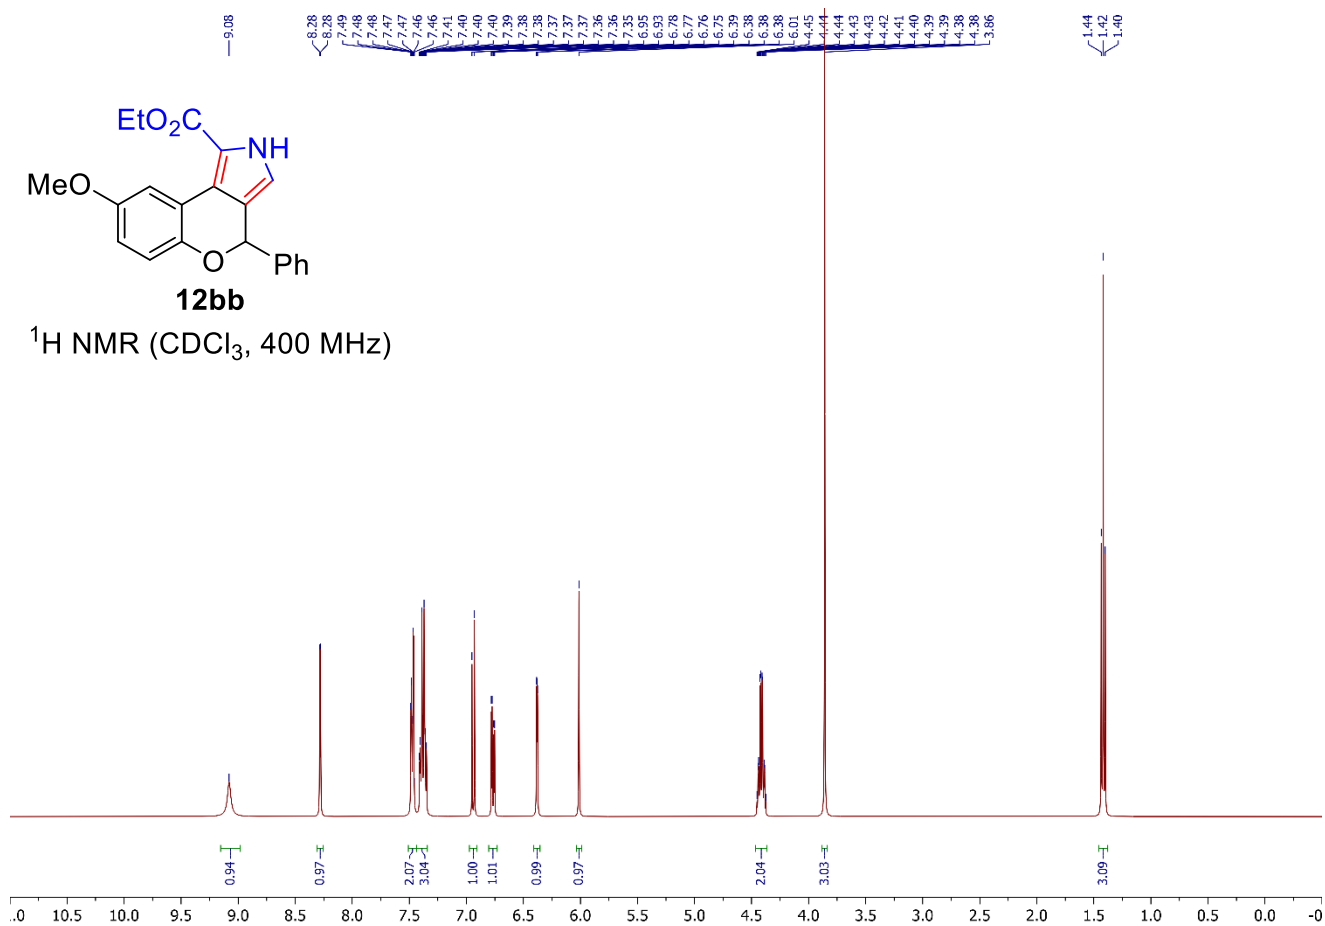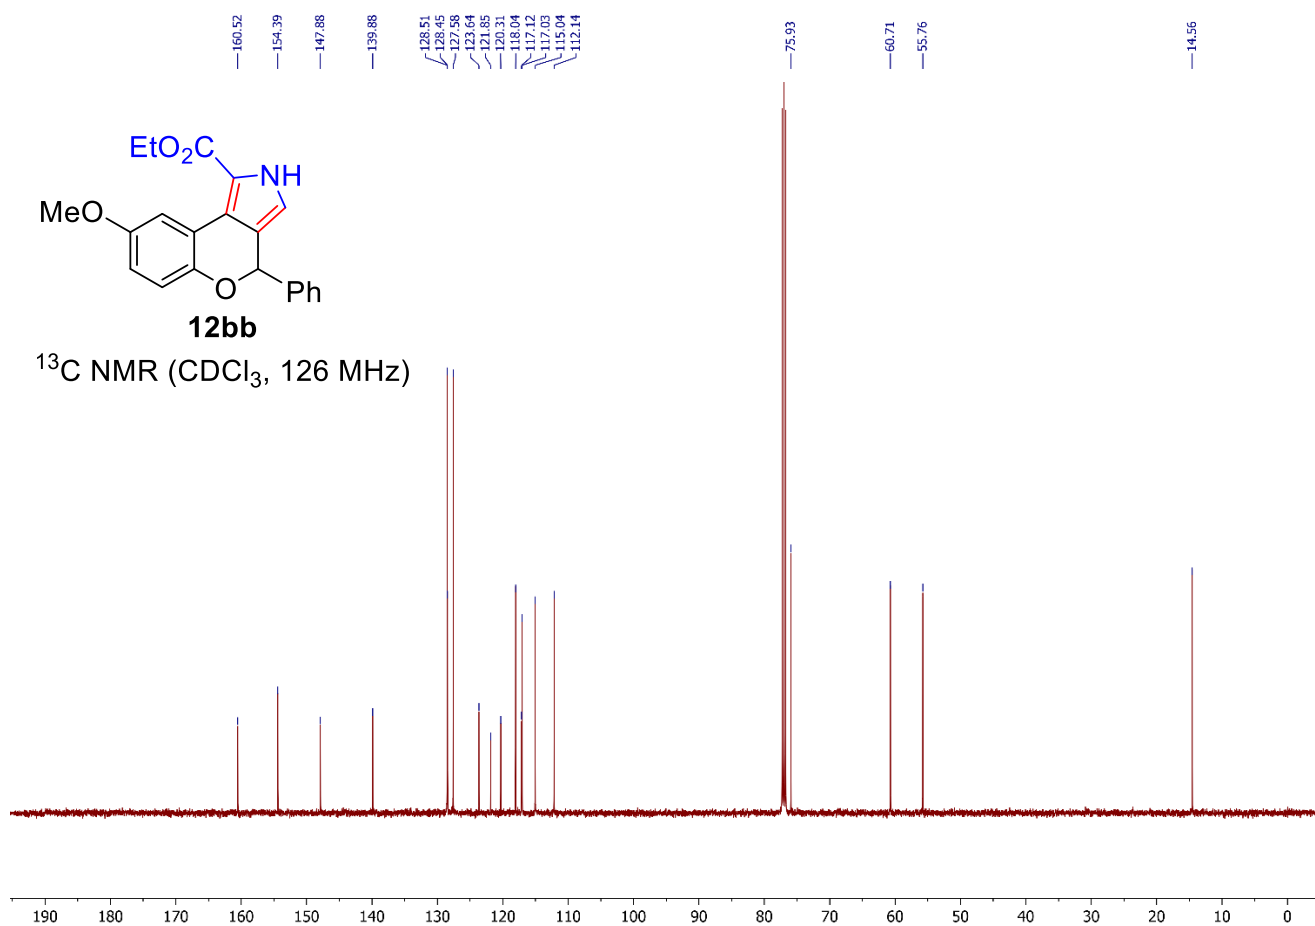

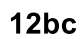

**12bc**

<sup>1</sup>H NMR (CDCl<sub>3</sub>, 400 MHz)

Chemical structure of **12bc** is shown above the spectrum. The structure is a benzofuran derivative with an ethyl ester group (EtO<sub>2</sub>C) and a phenyl group (Ph) attached to the furan ring, and an ethoxy group (OEt) attached to the benzene ring.

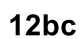

**12bc**

$^{13}\text{C}$  NMR ( $\text{CDCl}_3$ , 126 MHz)

Chemical structure of **12bc** is shown above the spectrum. The structure is a benzodioxane derivative with an ethyl ester group ( $\text{EtO}_2\text{C}$ ) and a phenyl group ( $\text{Ph}$ ) attached to the dioxane ring, and an ethoxy group ( $\text{OEt}$ ) attached to the benzene ring.

Peak list (ppm): 160.60, 146.33, 143.67, 139.96, 128.28, 128.12, 127.31, 123.01, 121.37, 121.10, 120.91, 120.18, 117.15, 117.03, 114.47, 75.41, 65.14, 60.68, 14.90, 14.43.

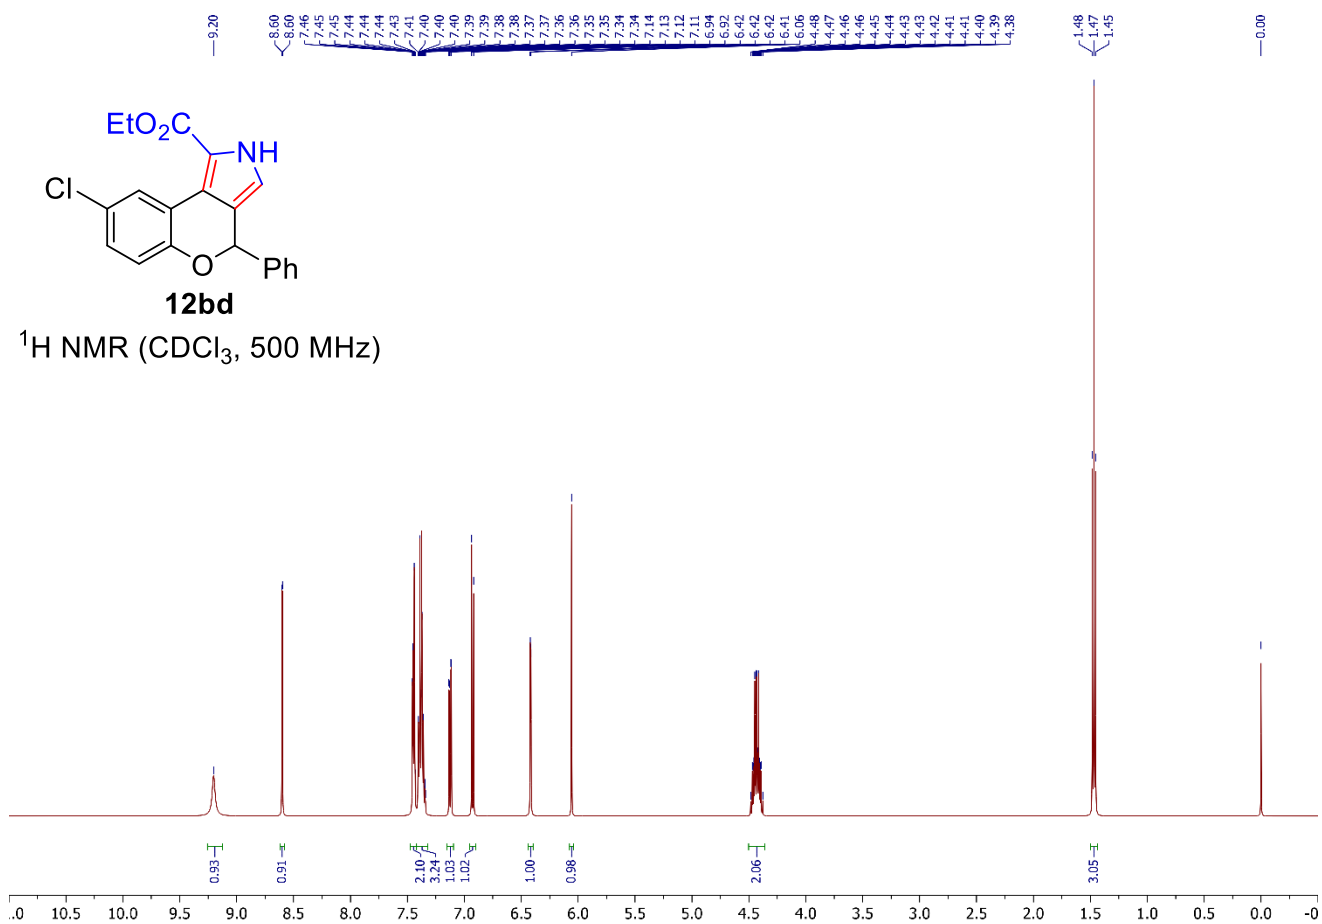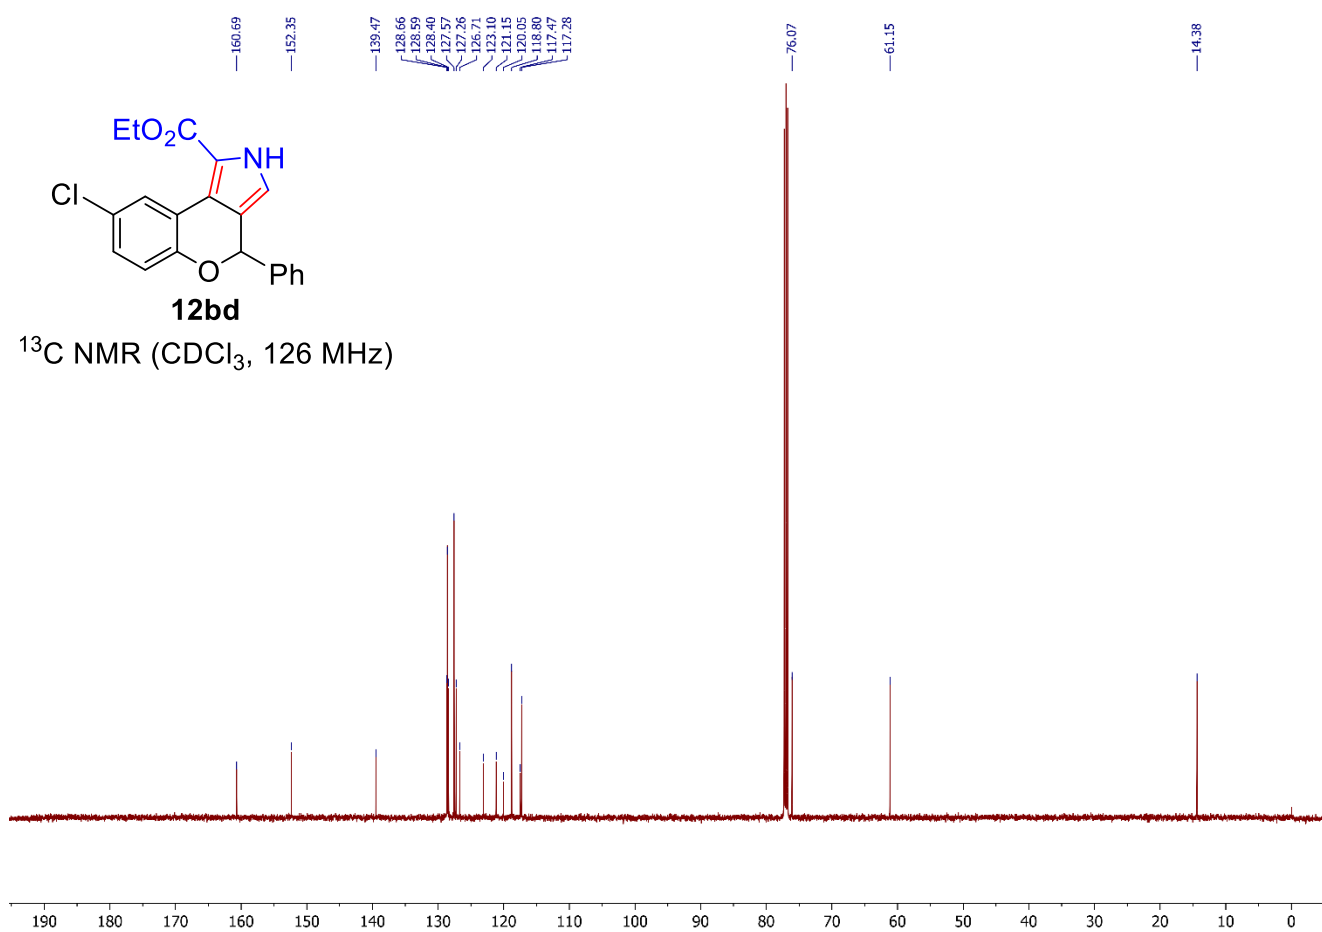

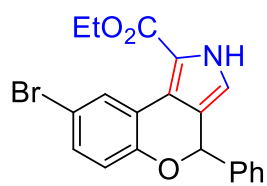

**12be**

$^1\text{H}$  NMR ( $\text{CDCl}_3$ , 400 MHz)

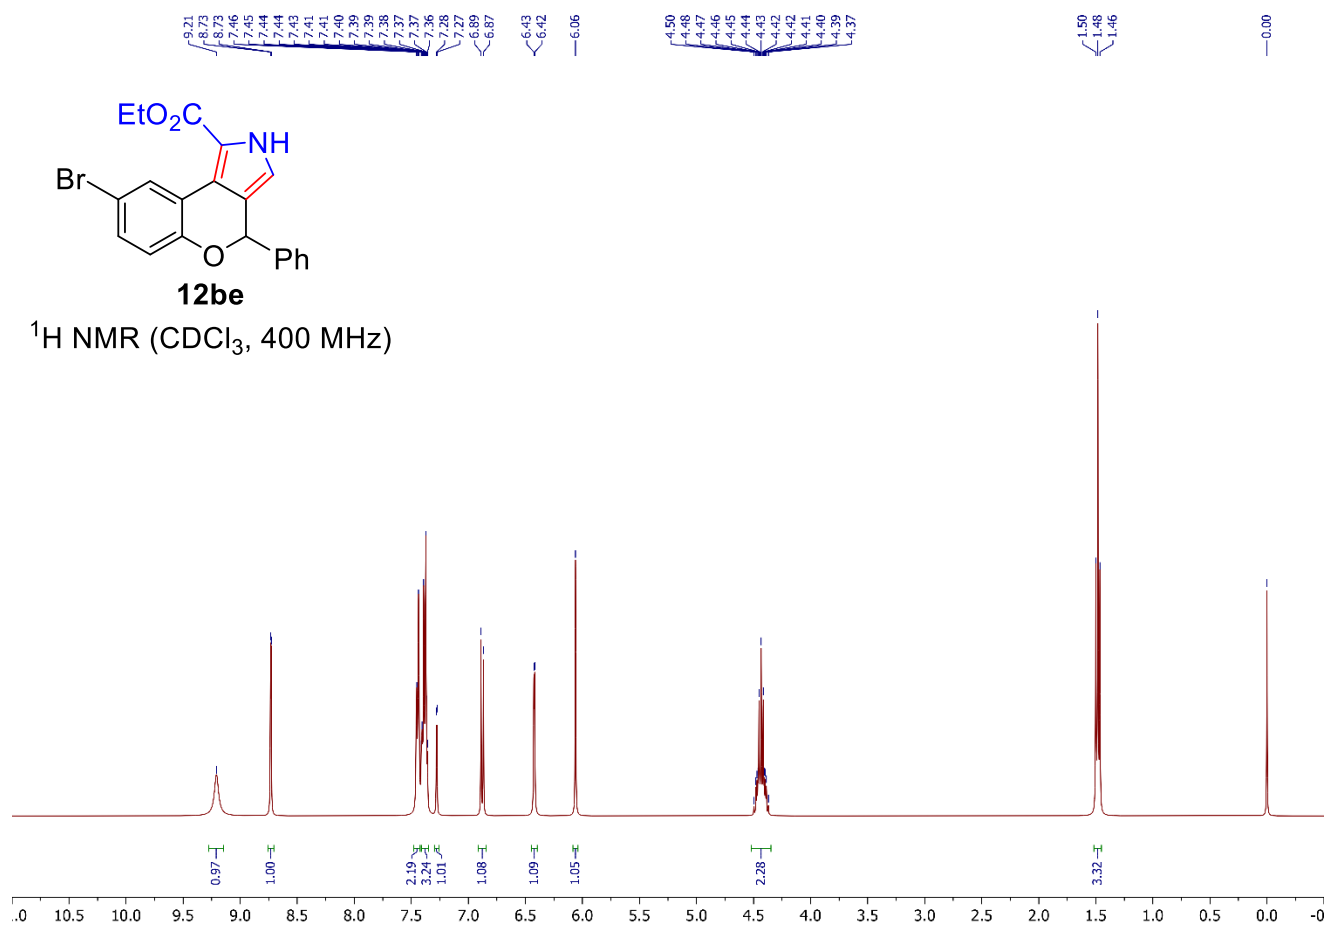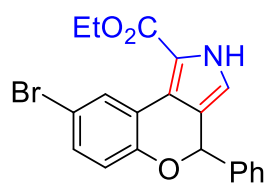

**12be**

$^{13}\text{C}$  NMR ( $\text{CDCl}_3$ , 126 MHz)

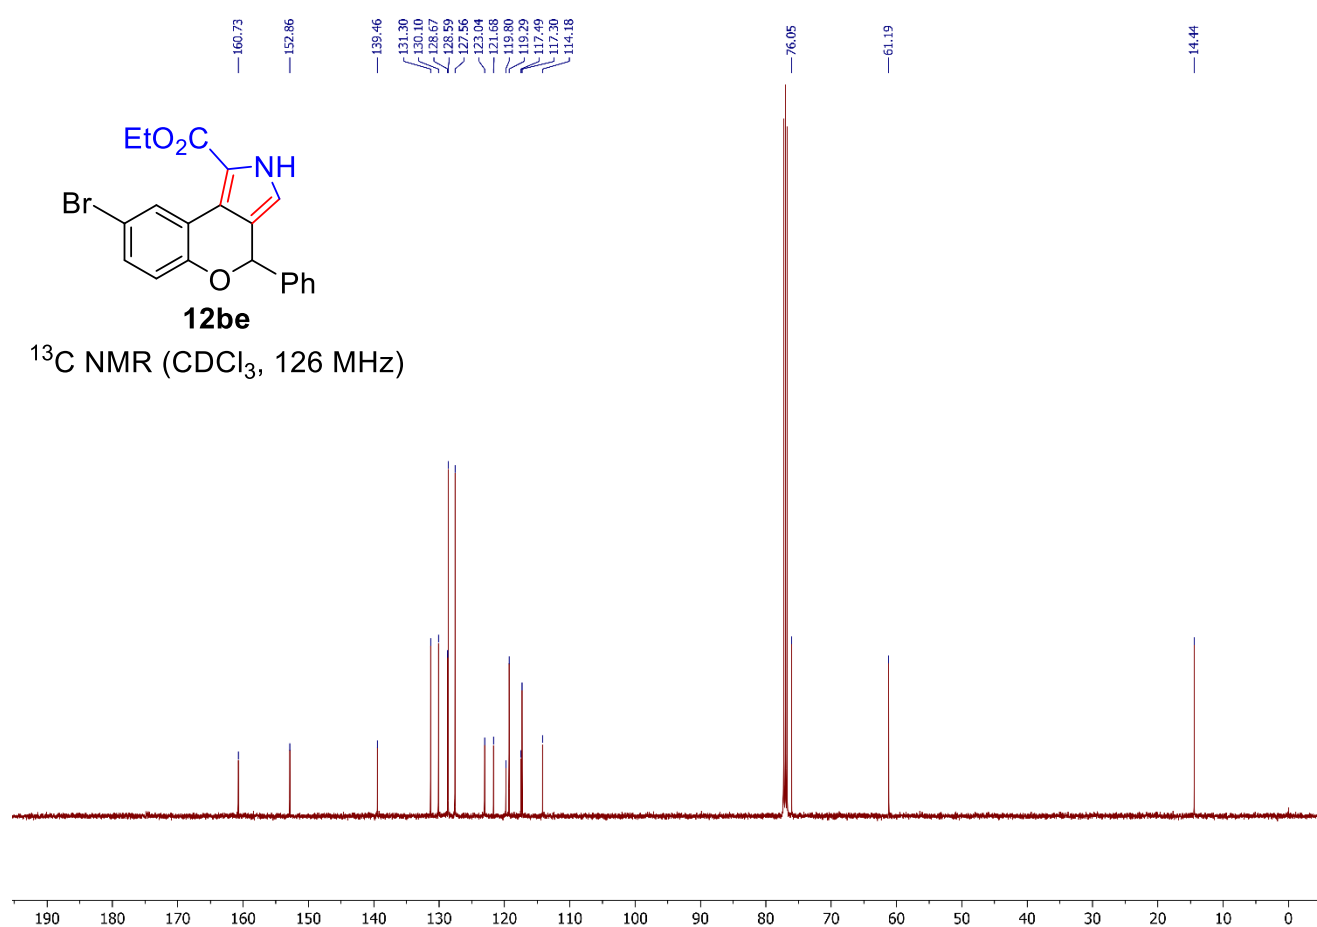

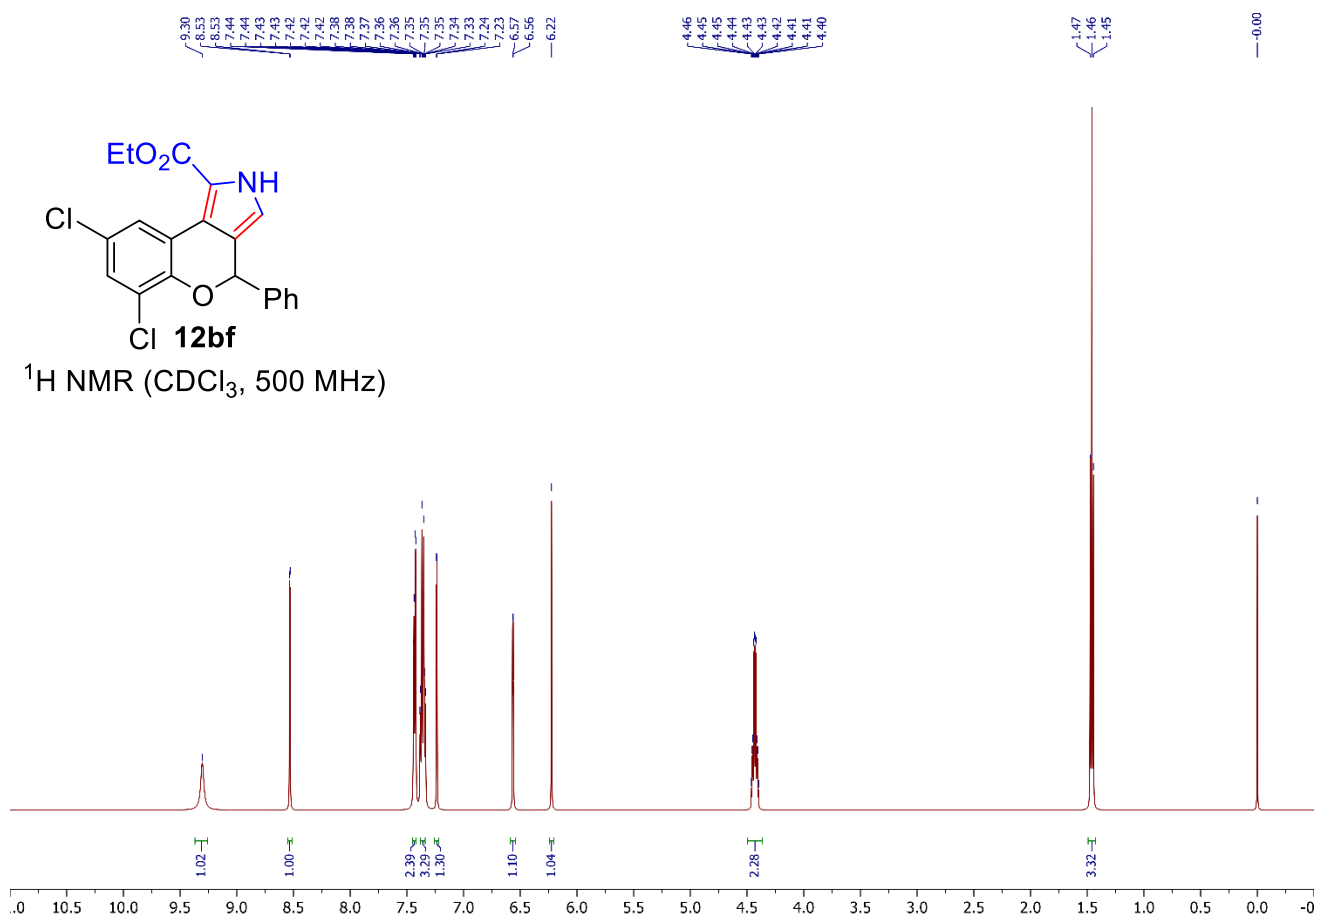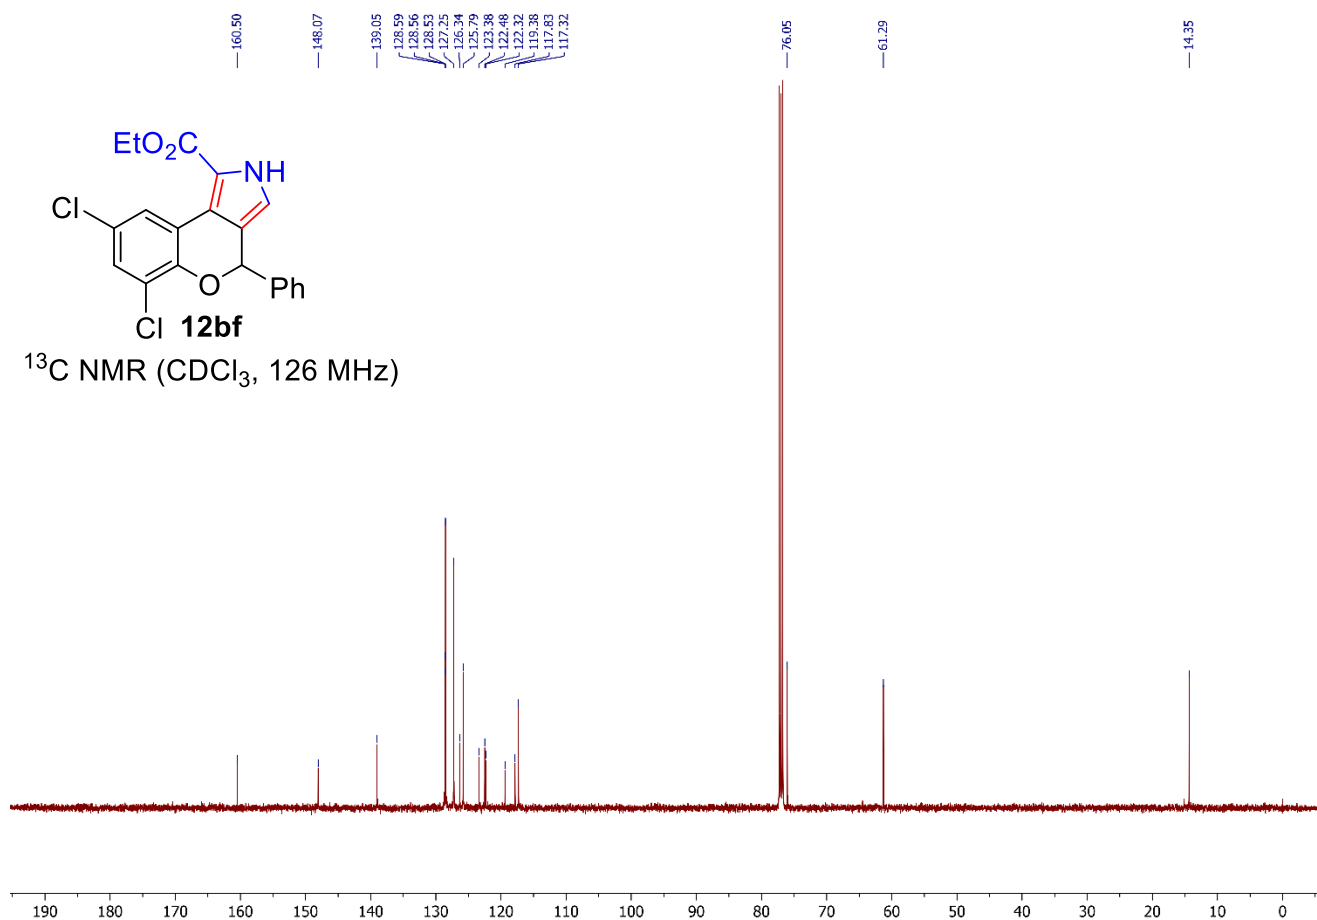

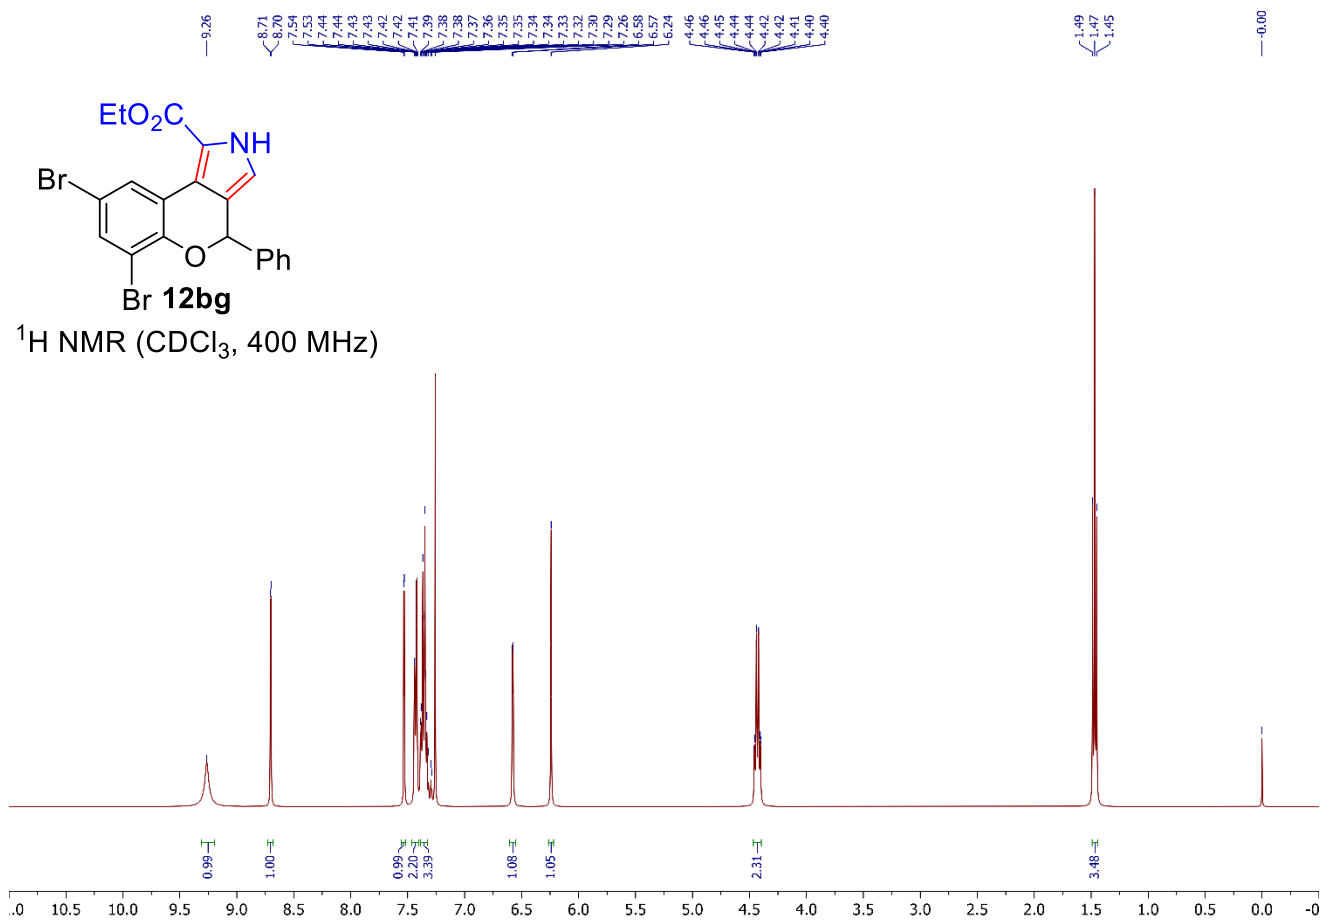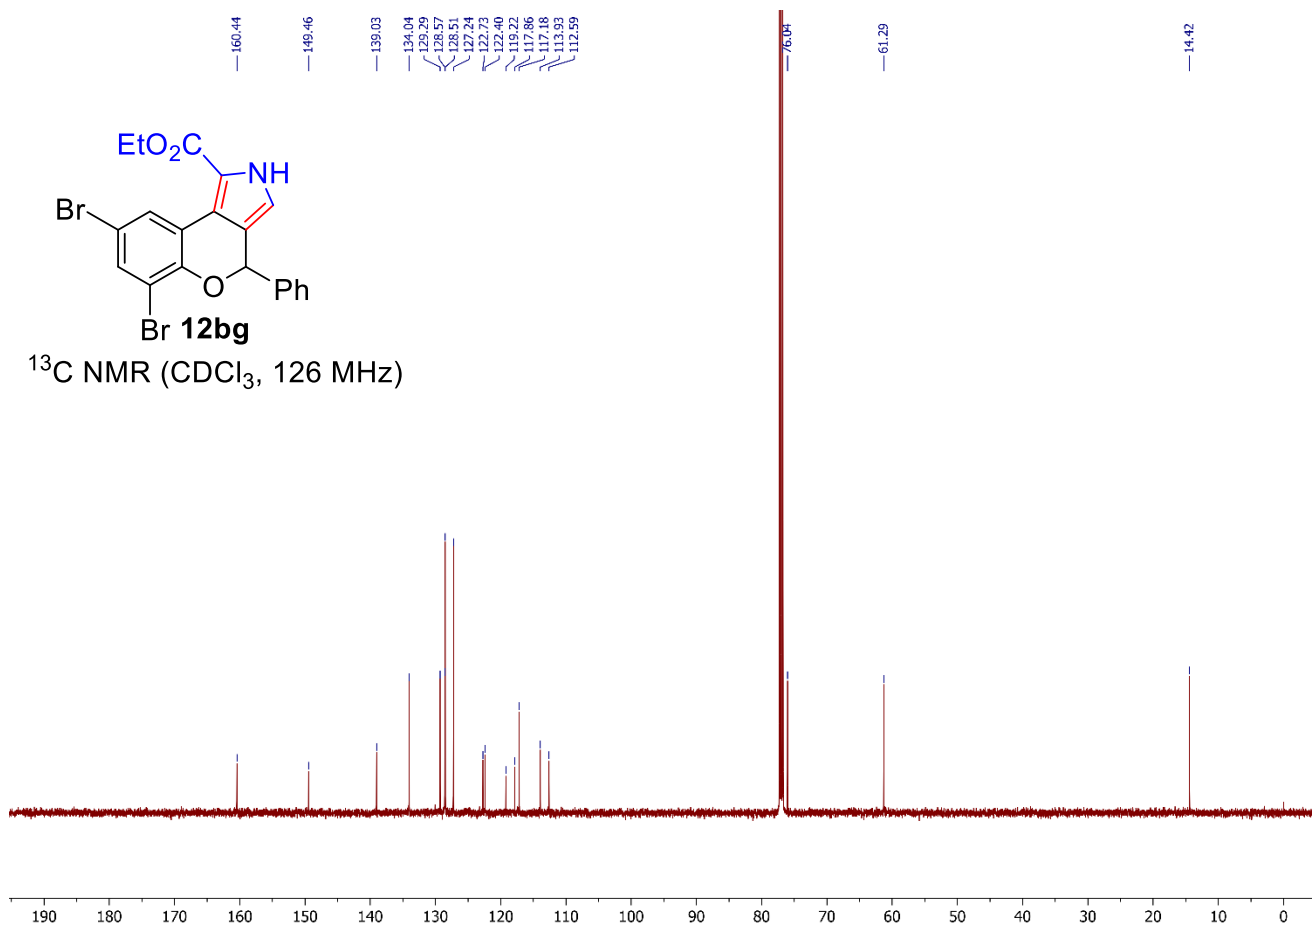

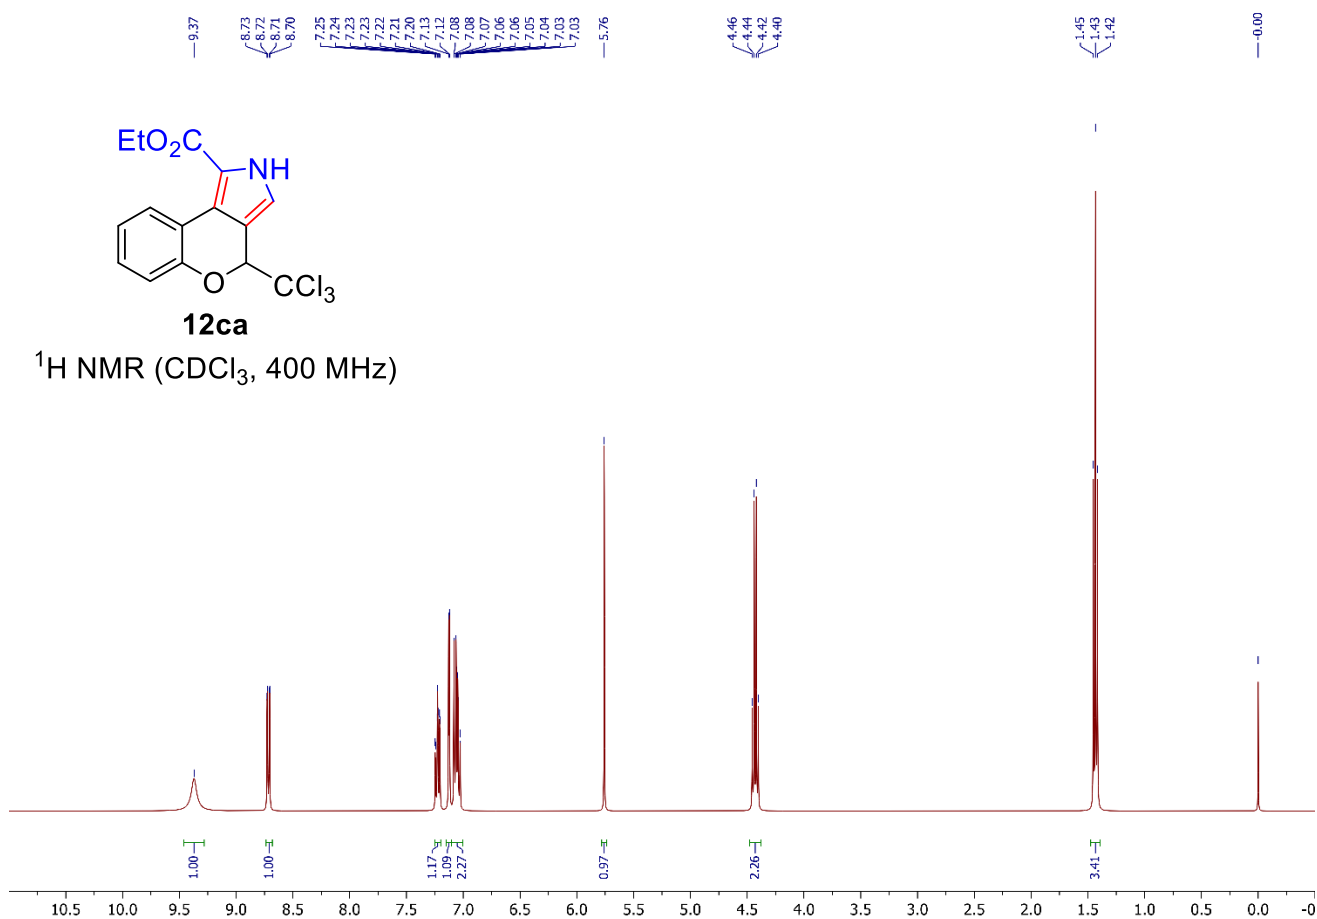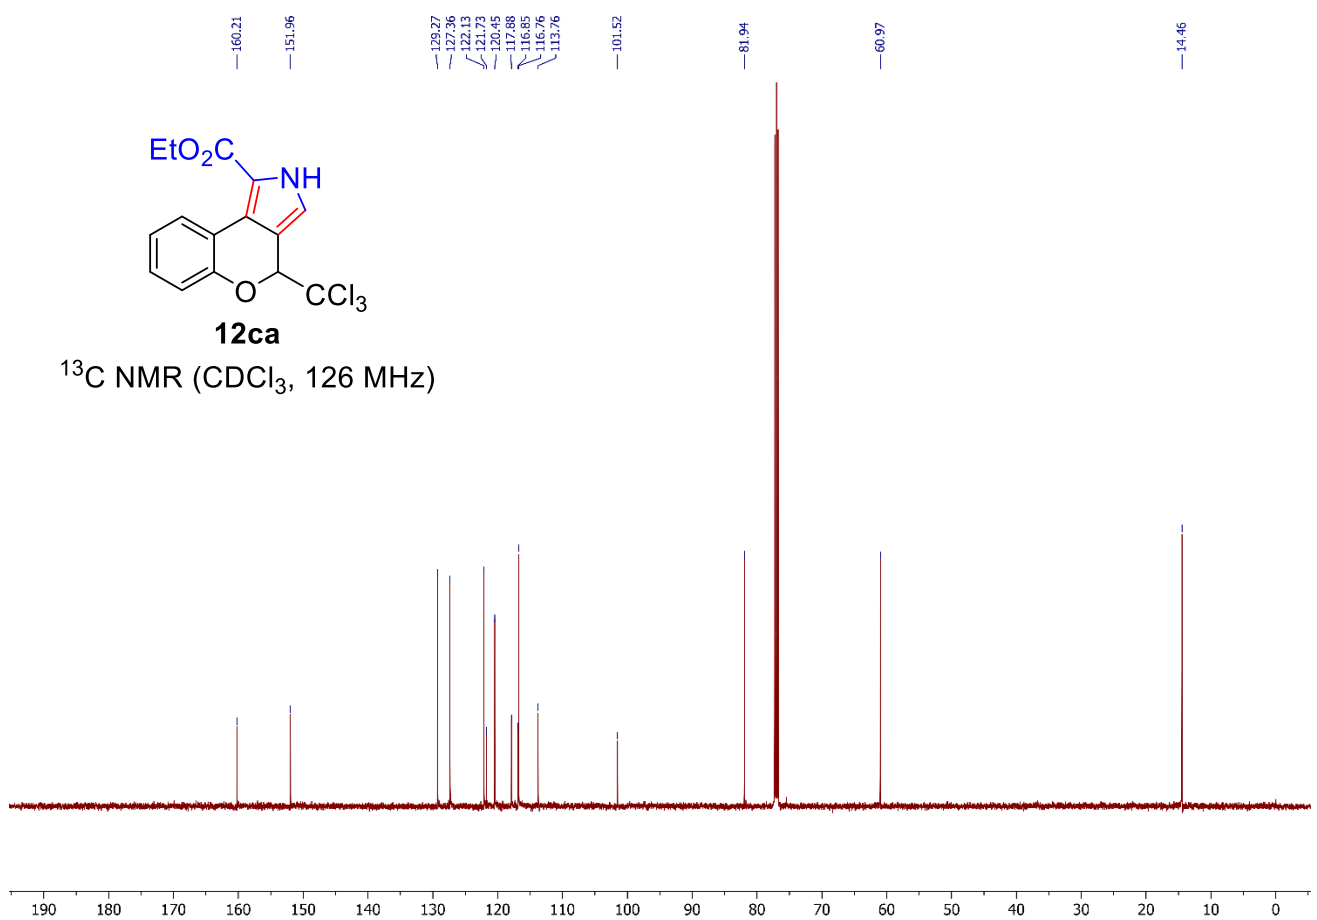



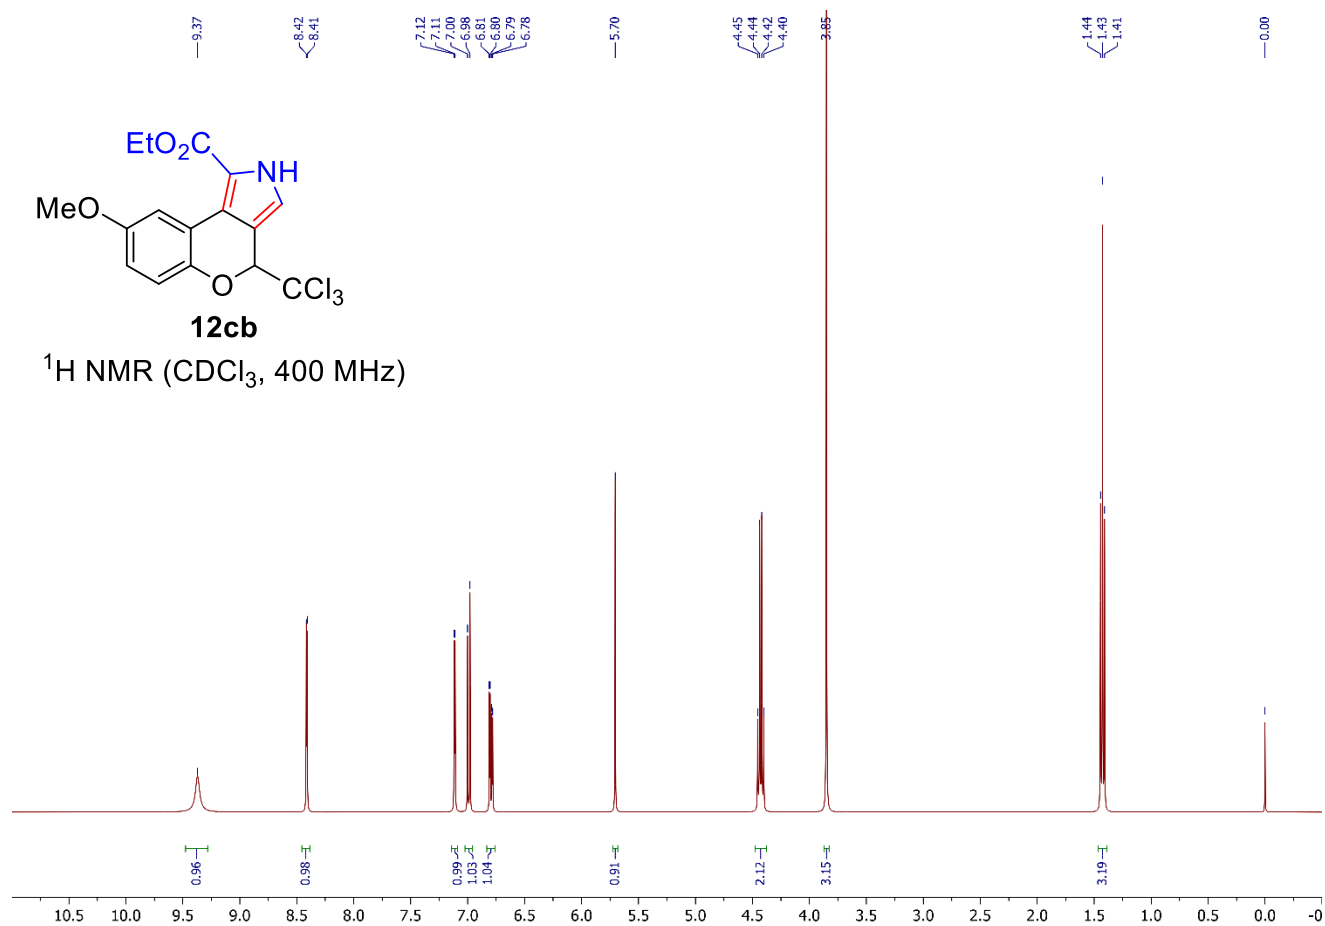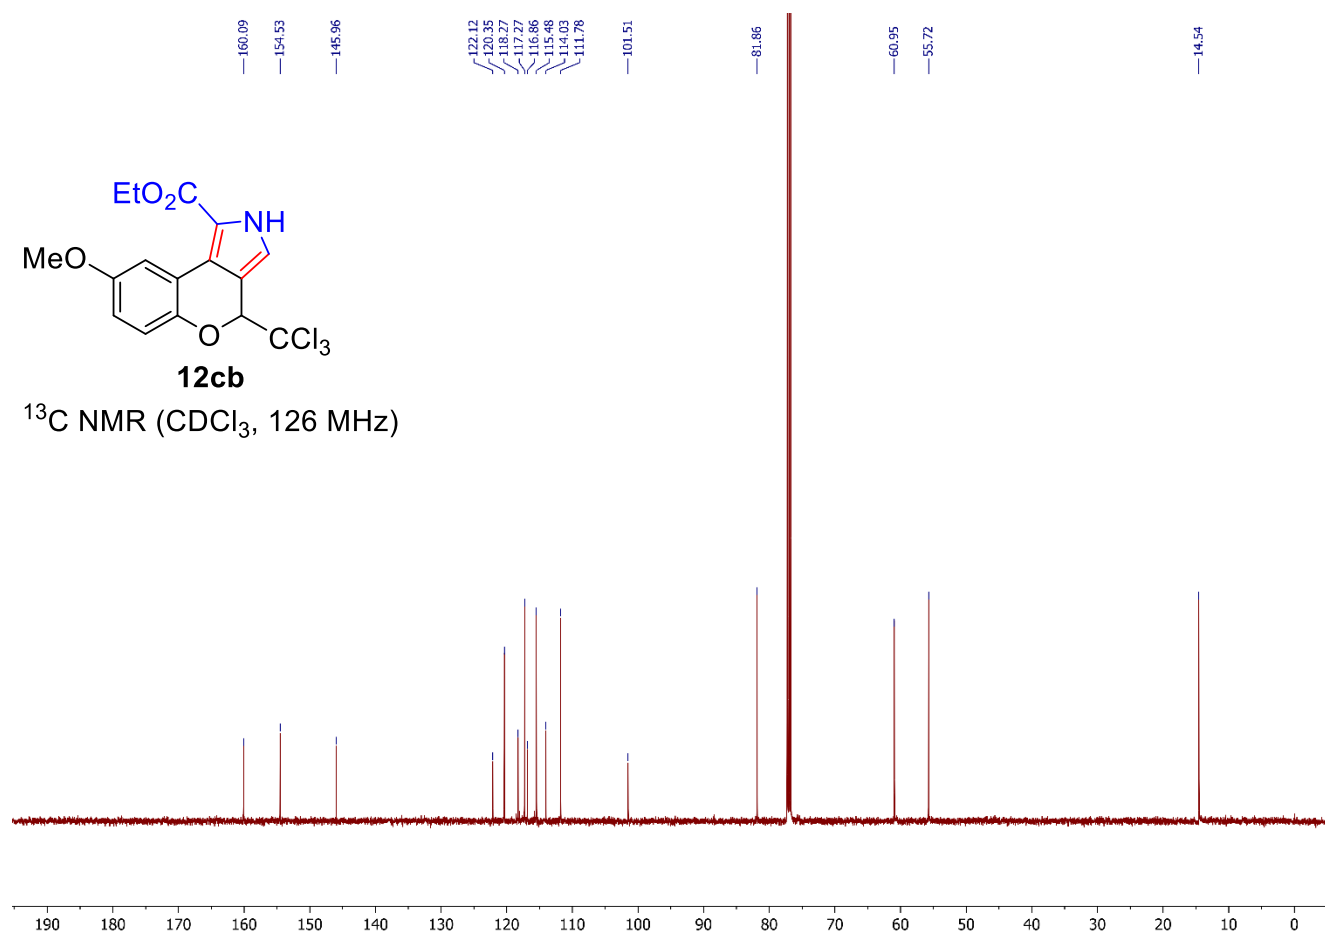

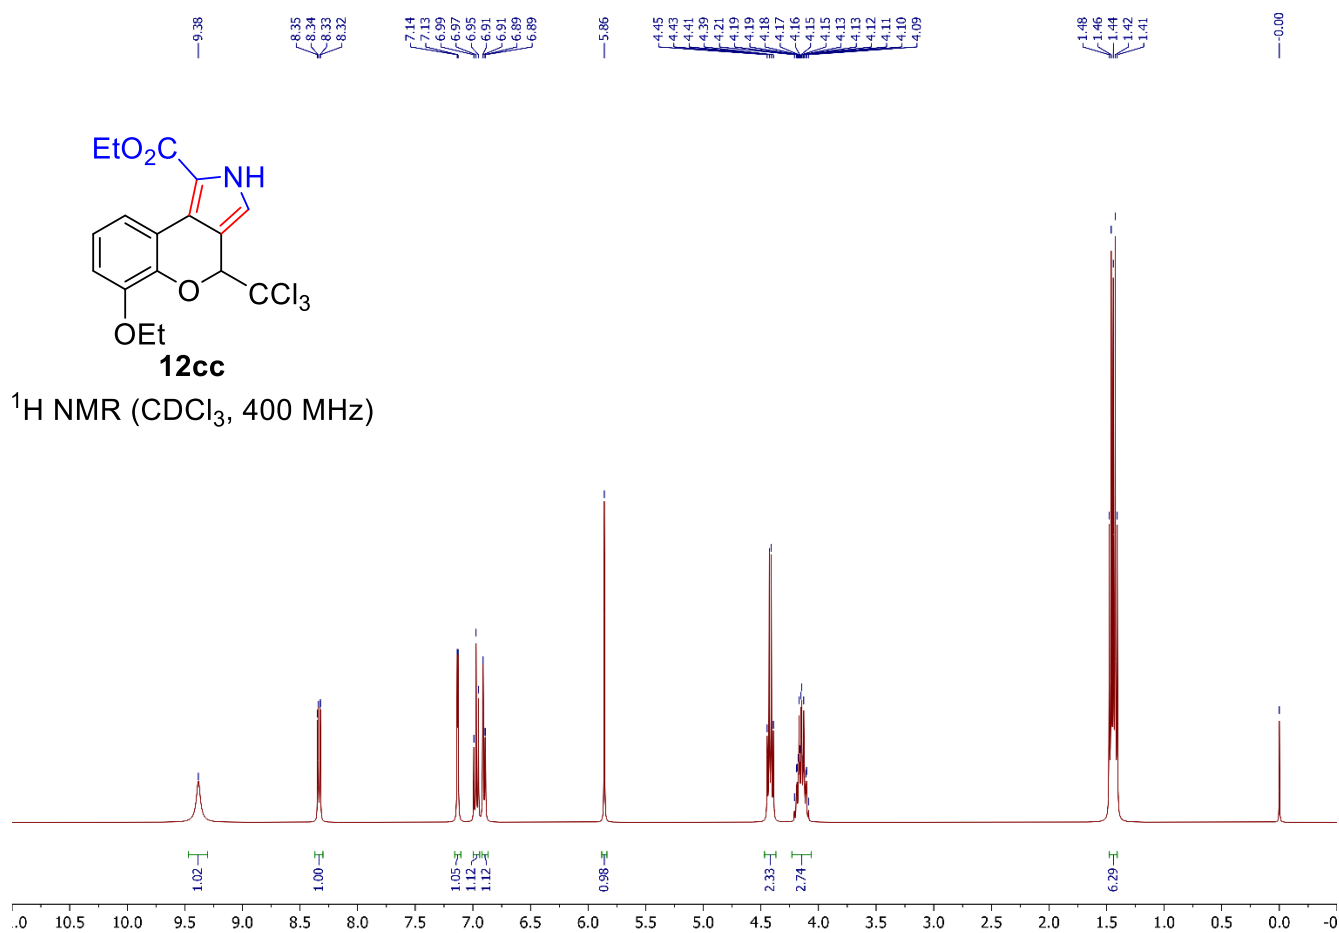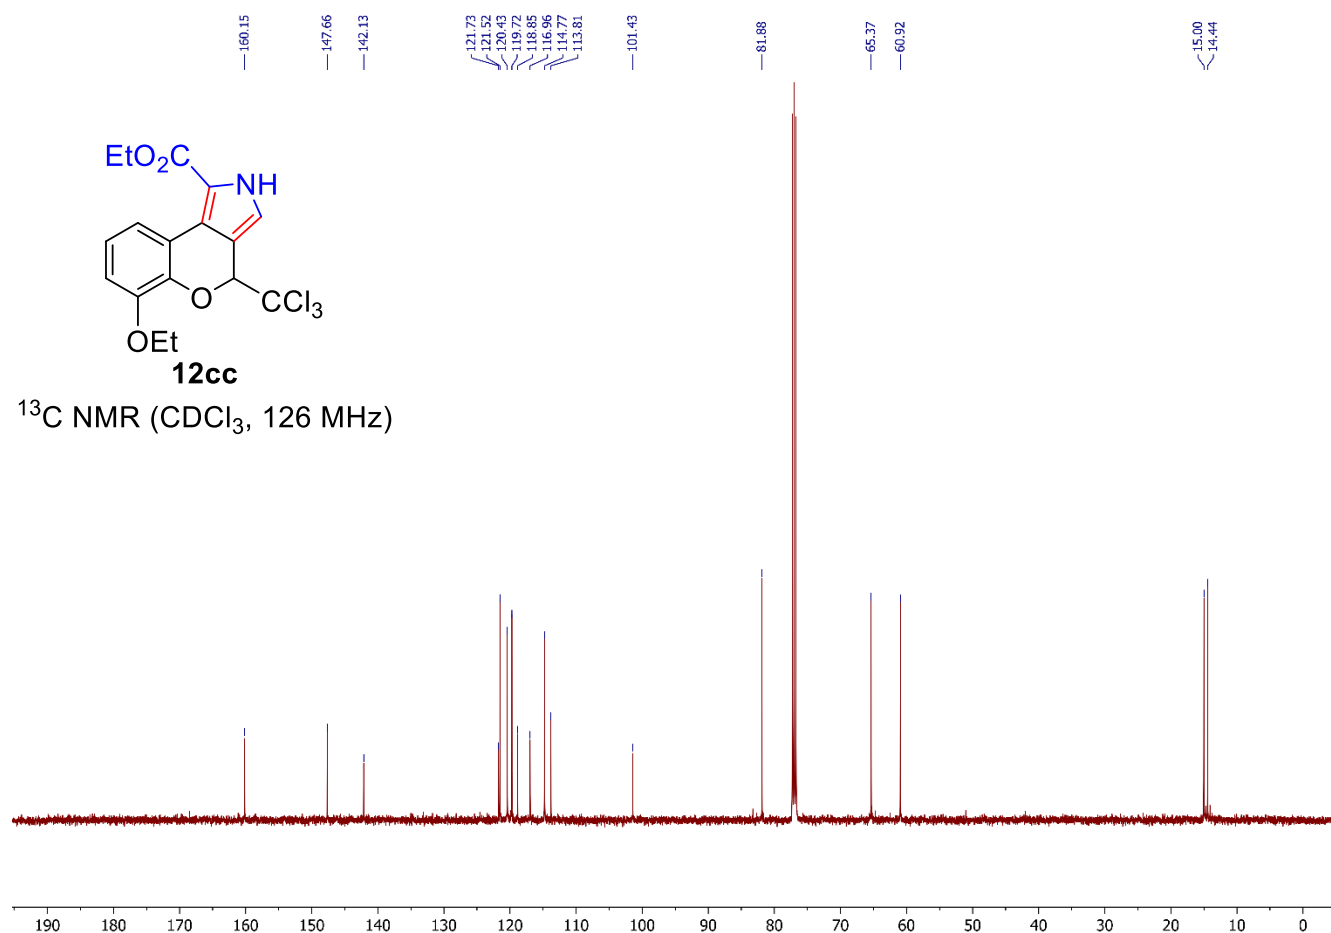

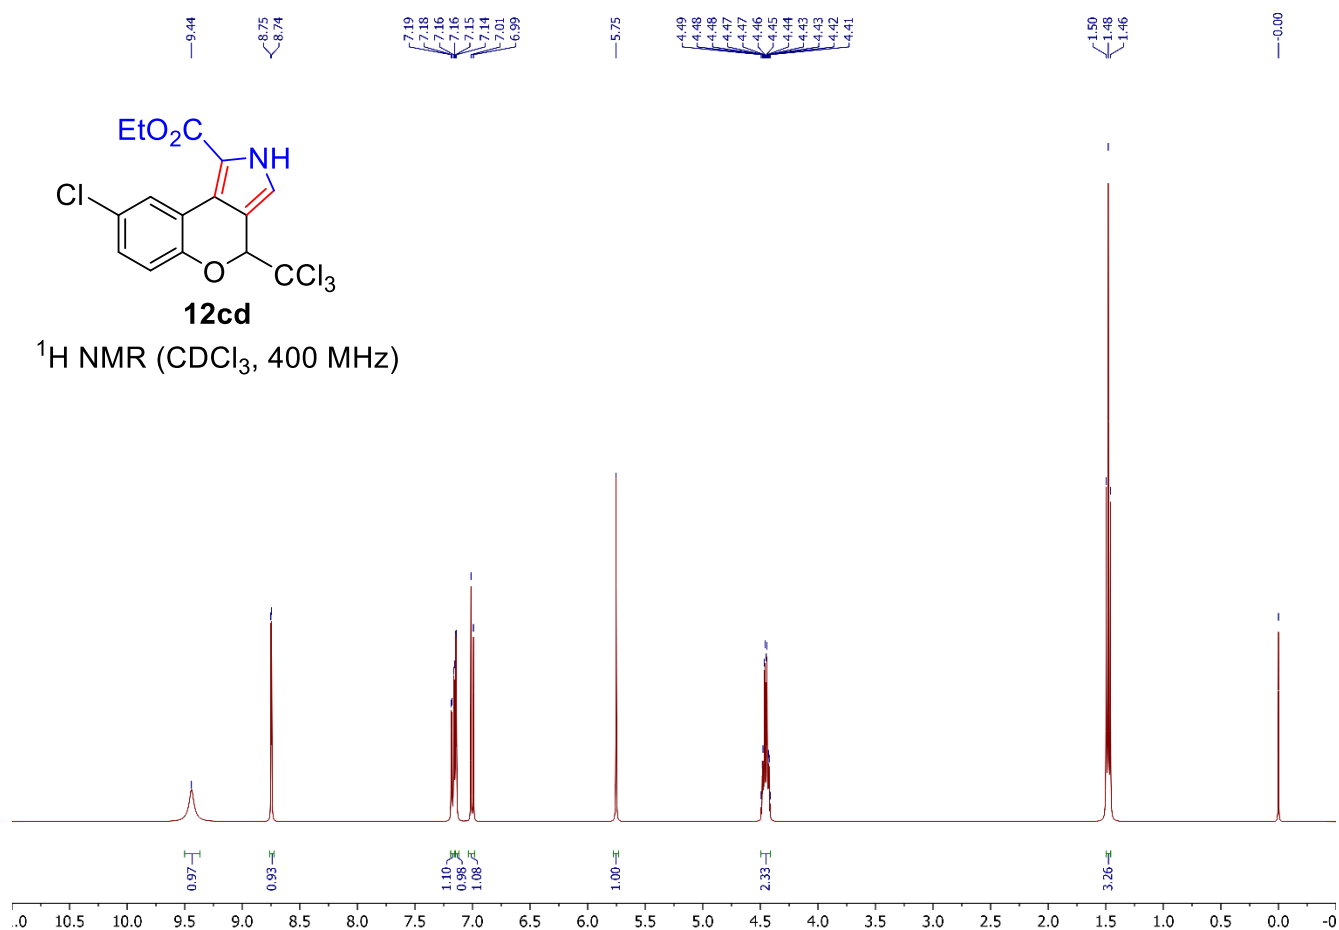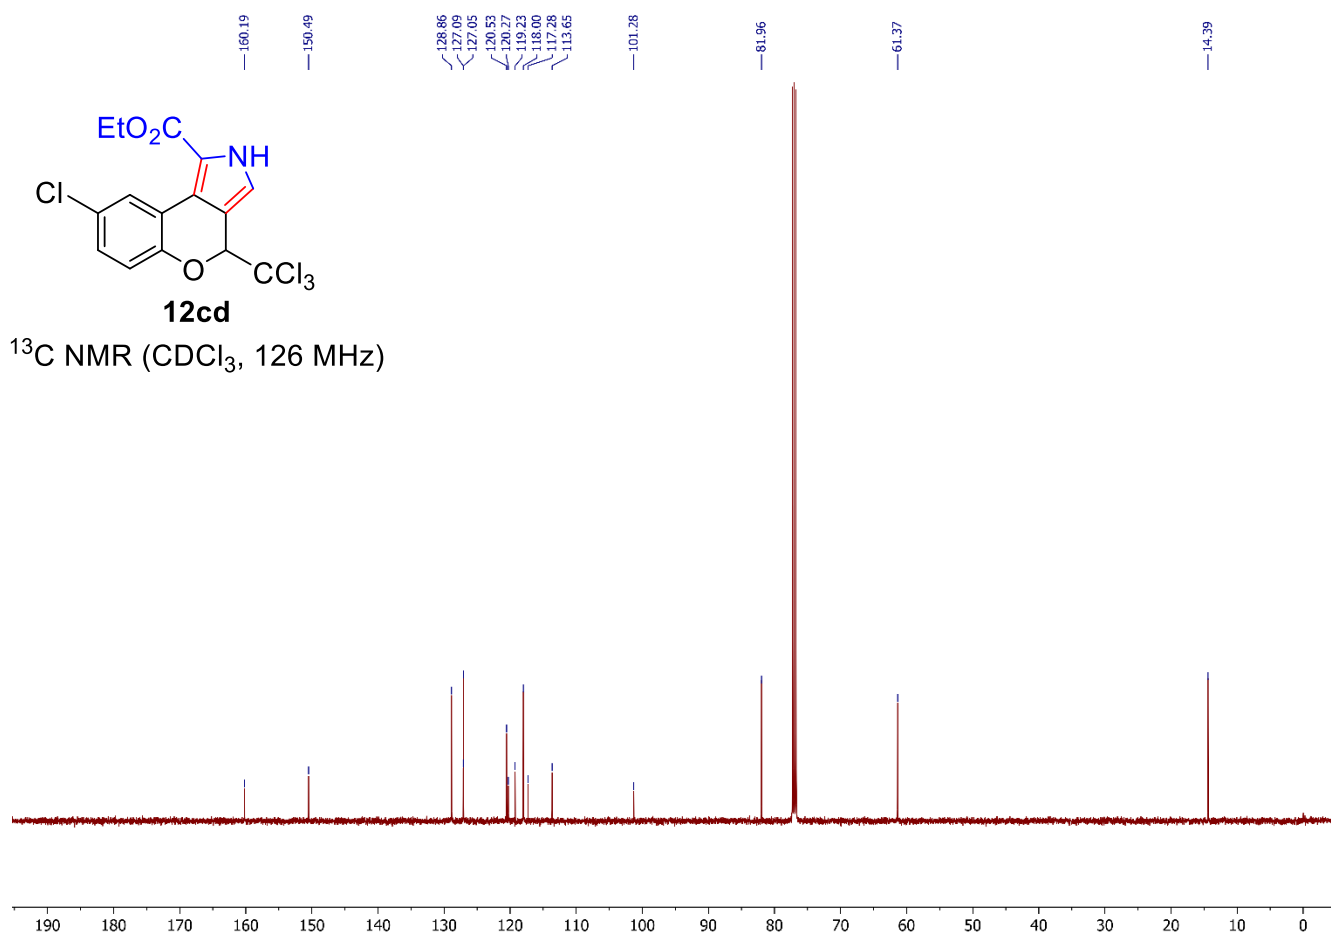

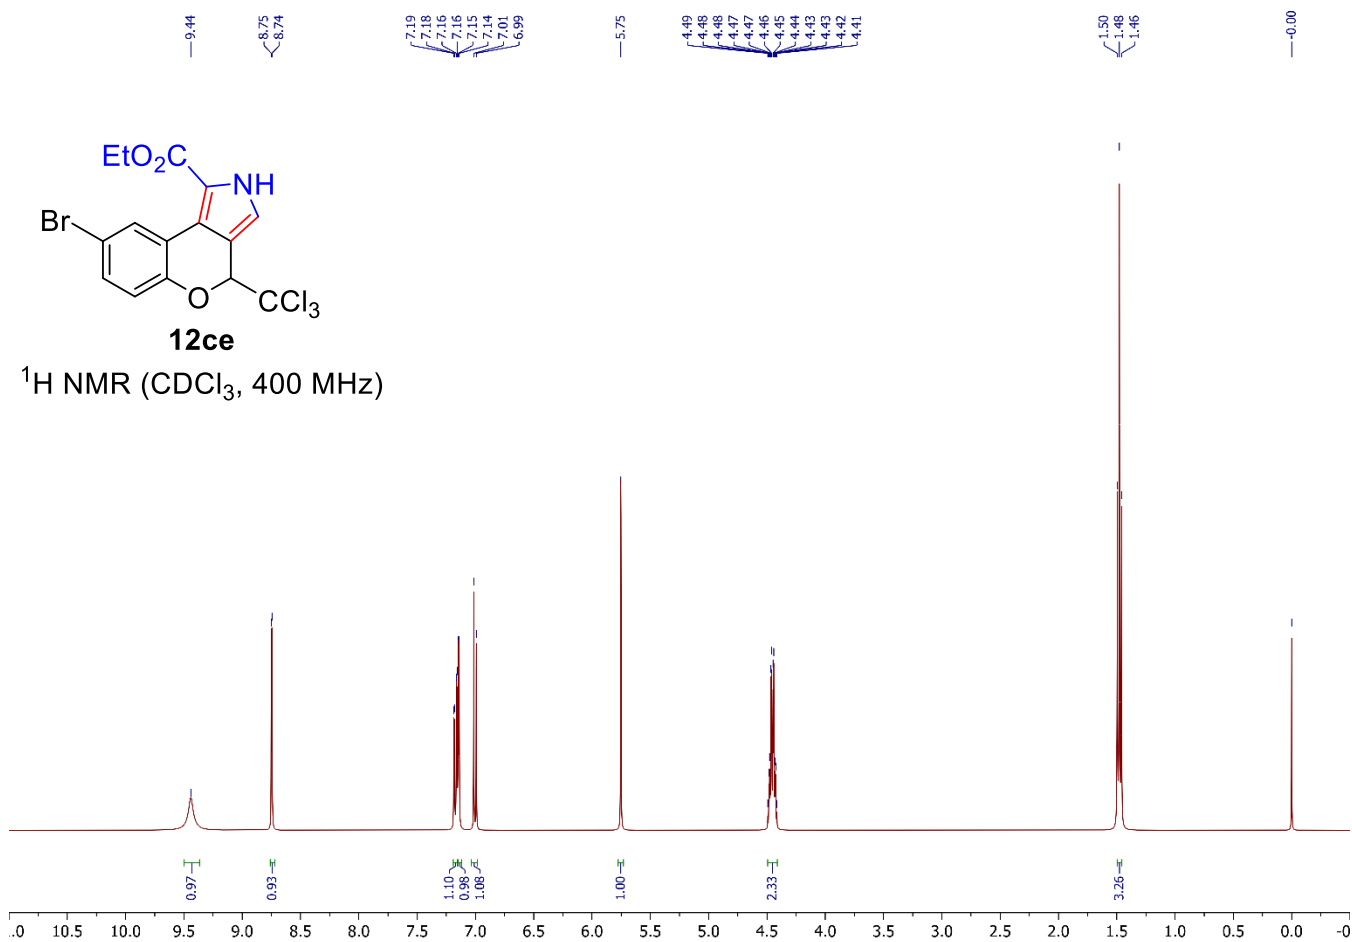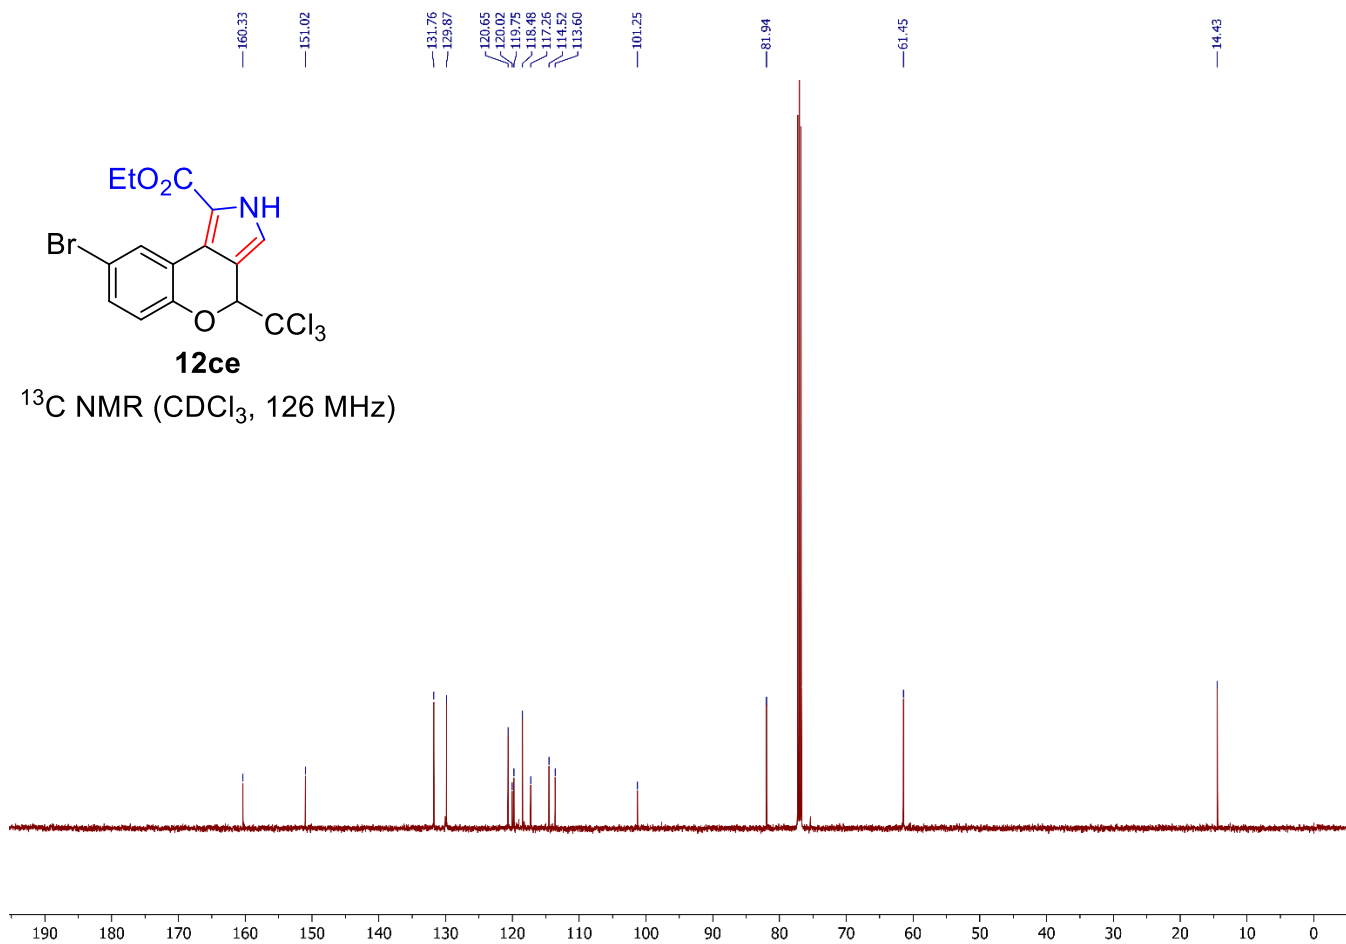

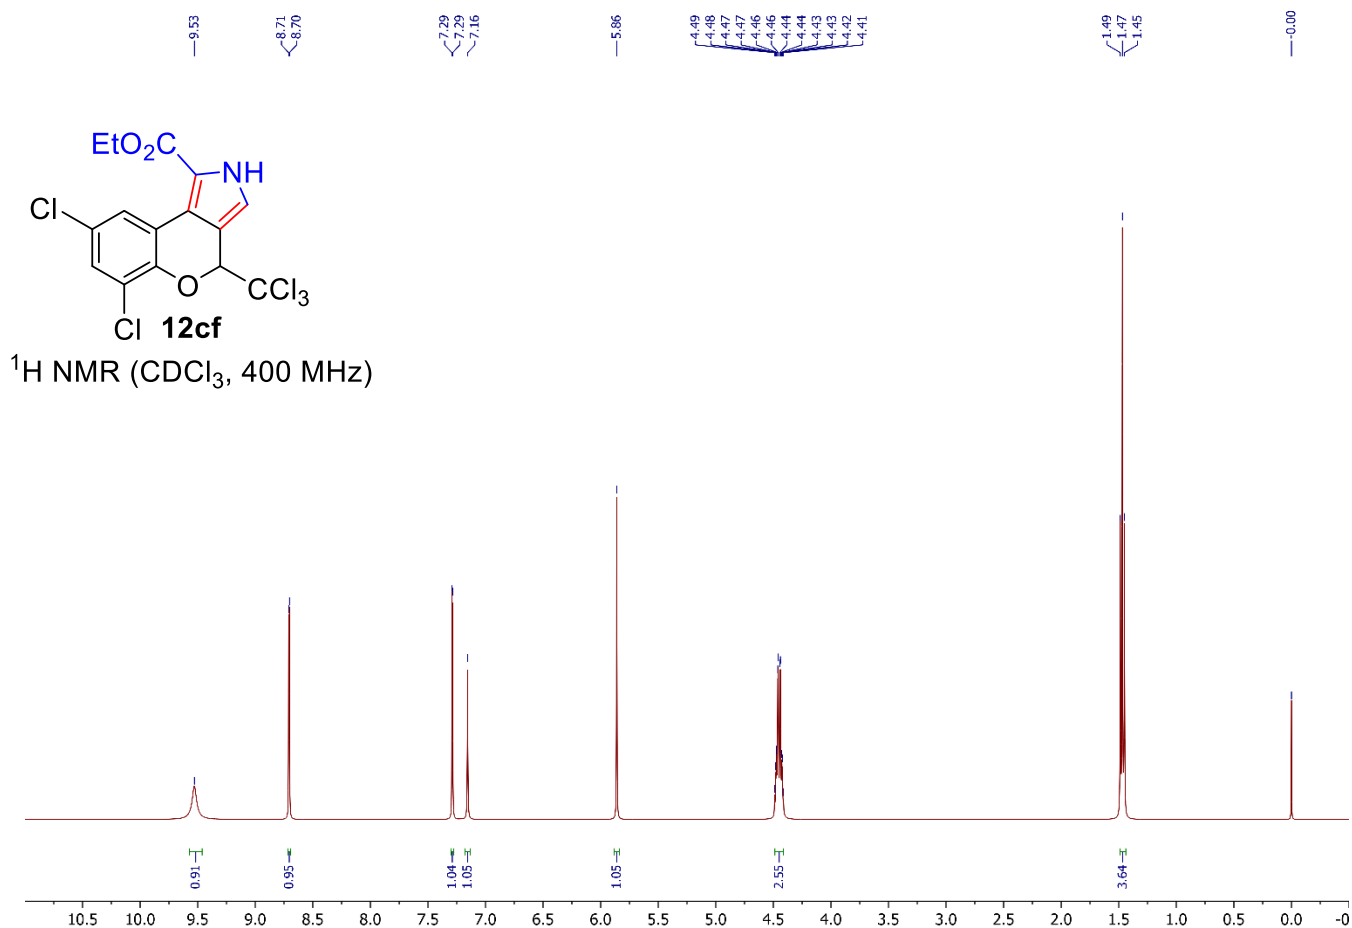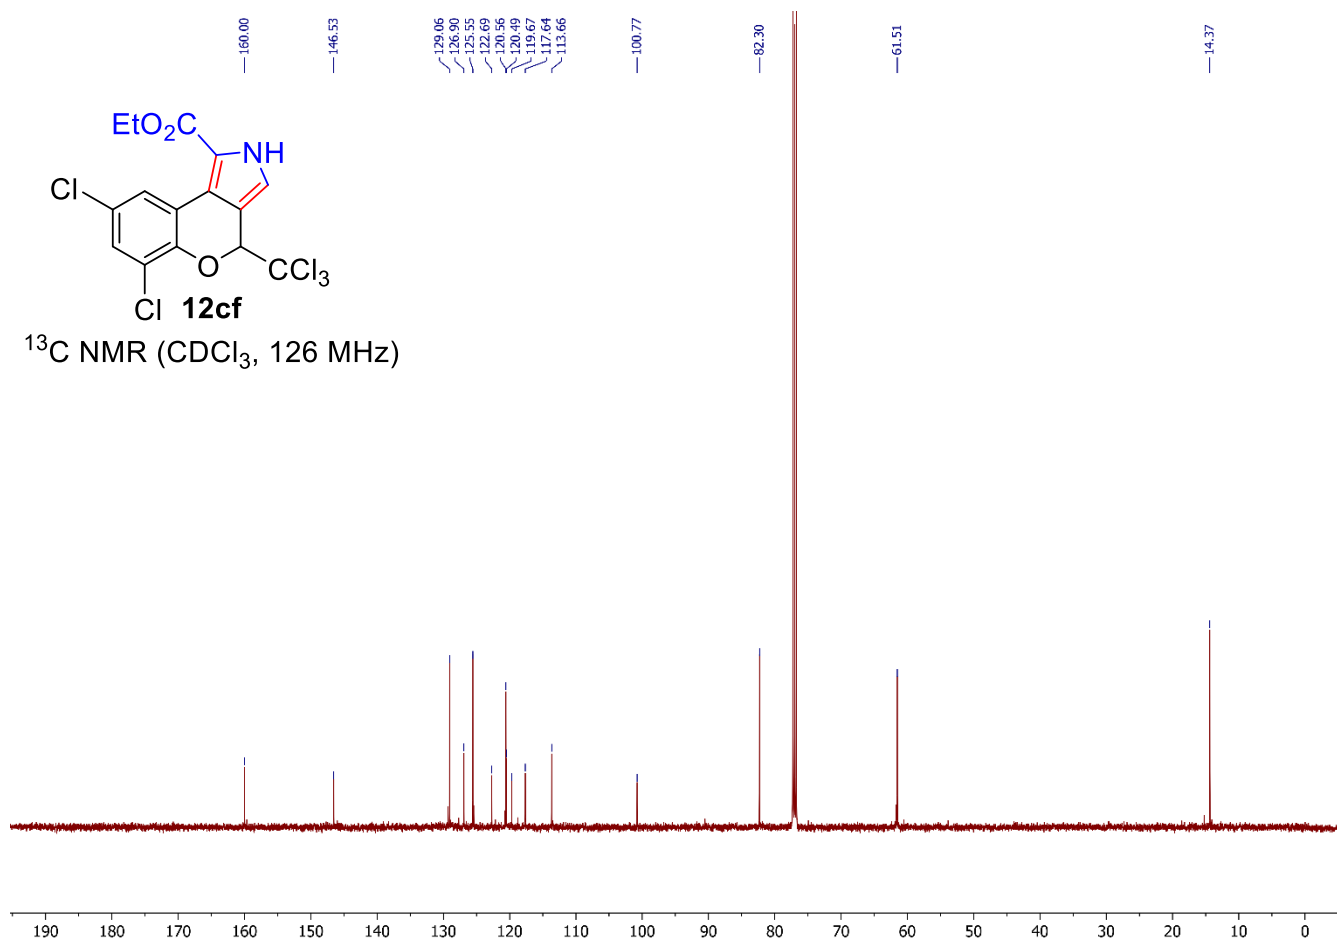

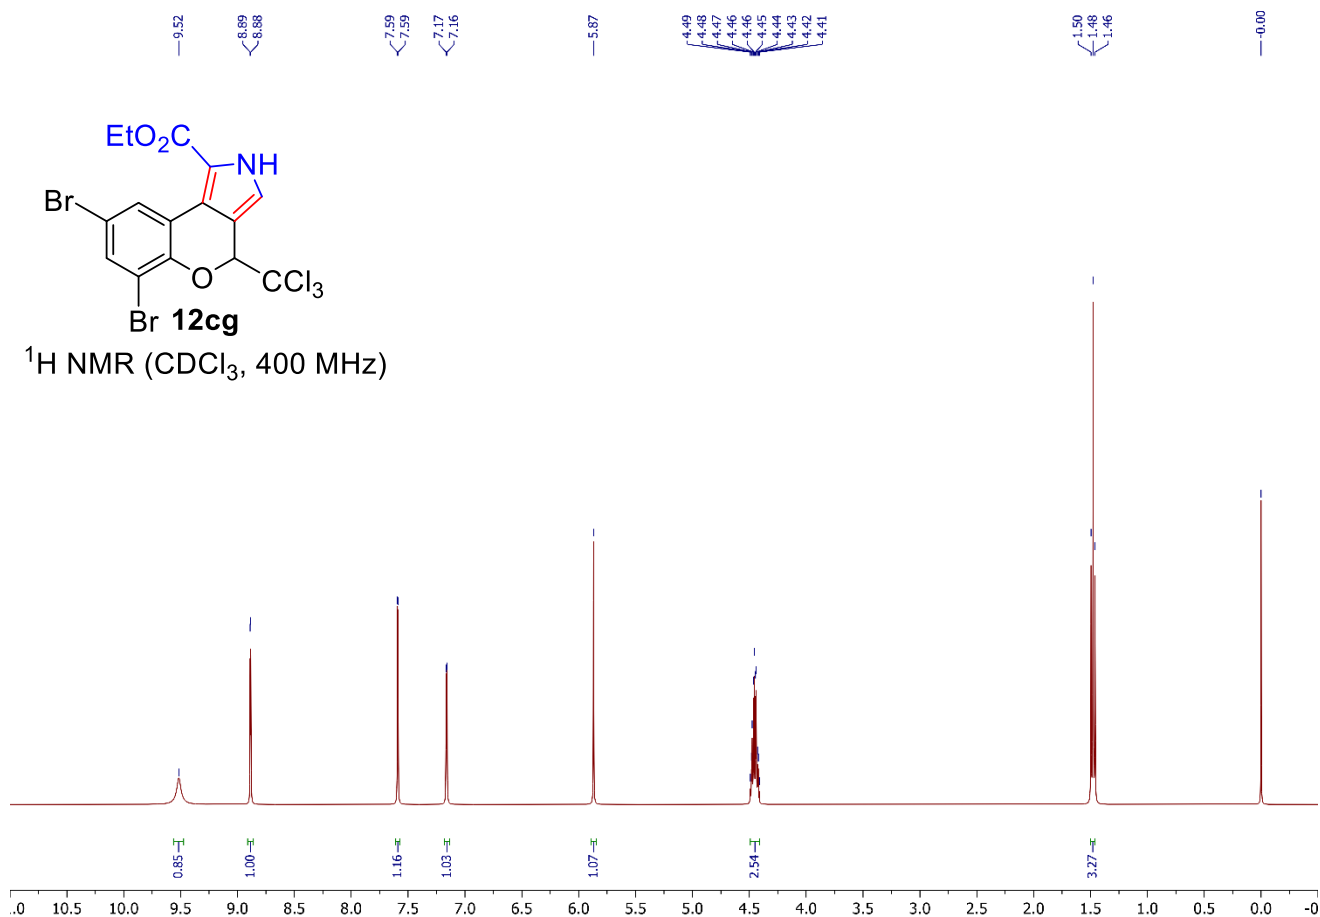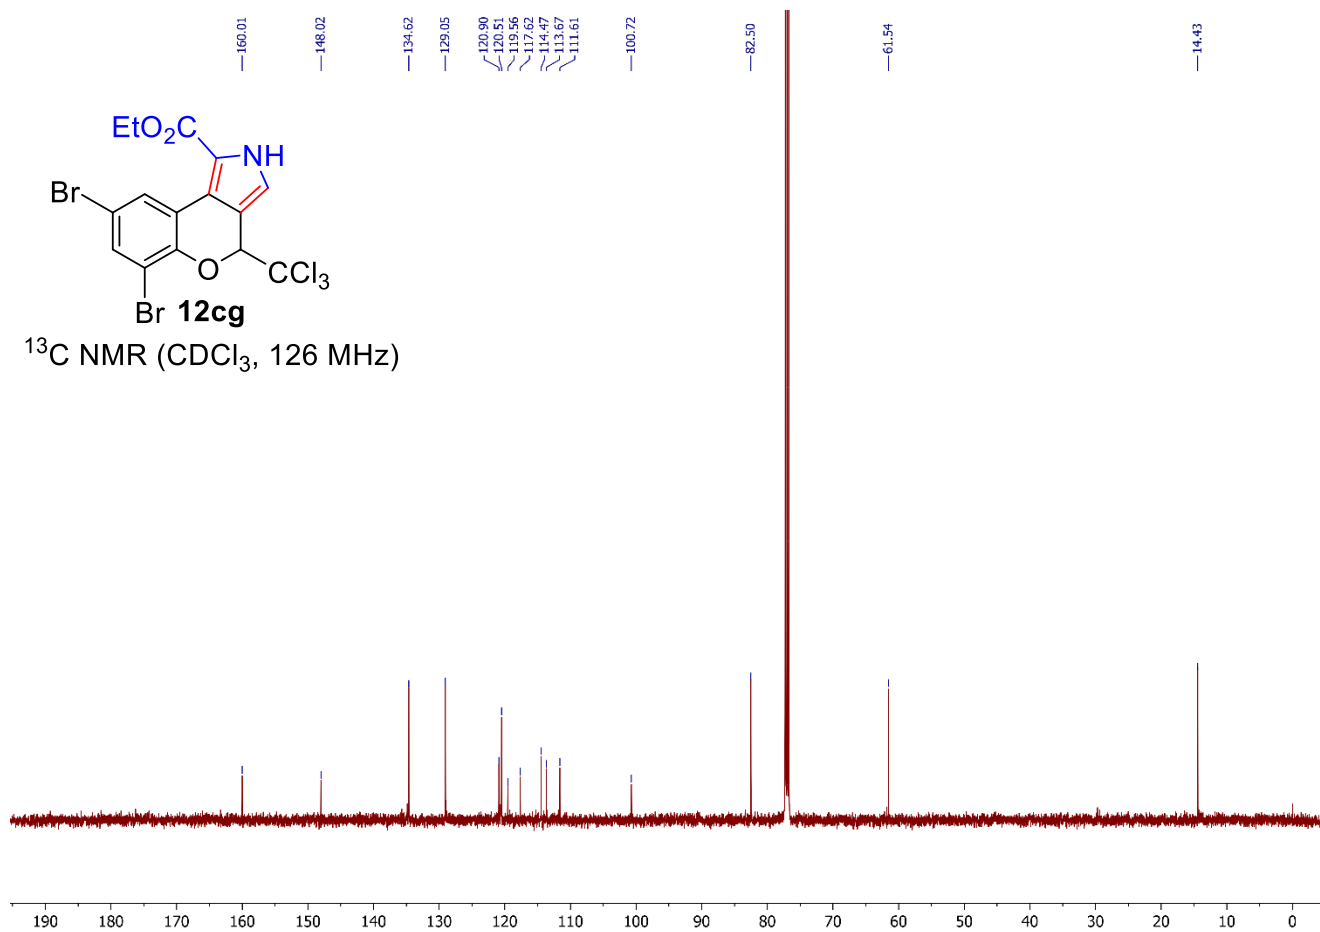

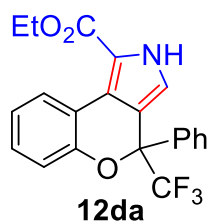

$^1\text{H}$  NMR ( $\text{CDCl}_3$ , 400 MHz)

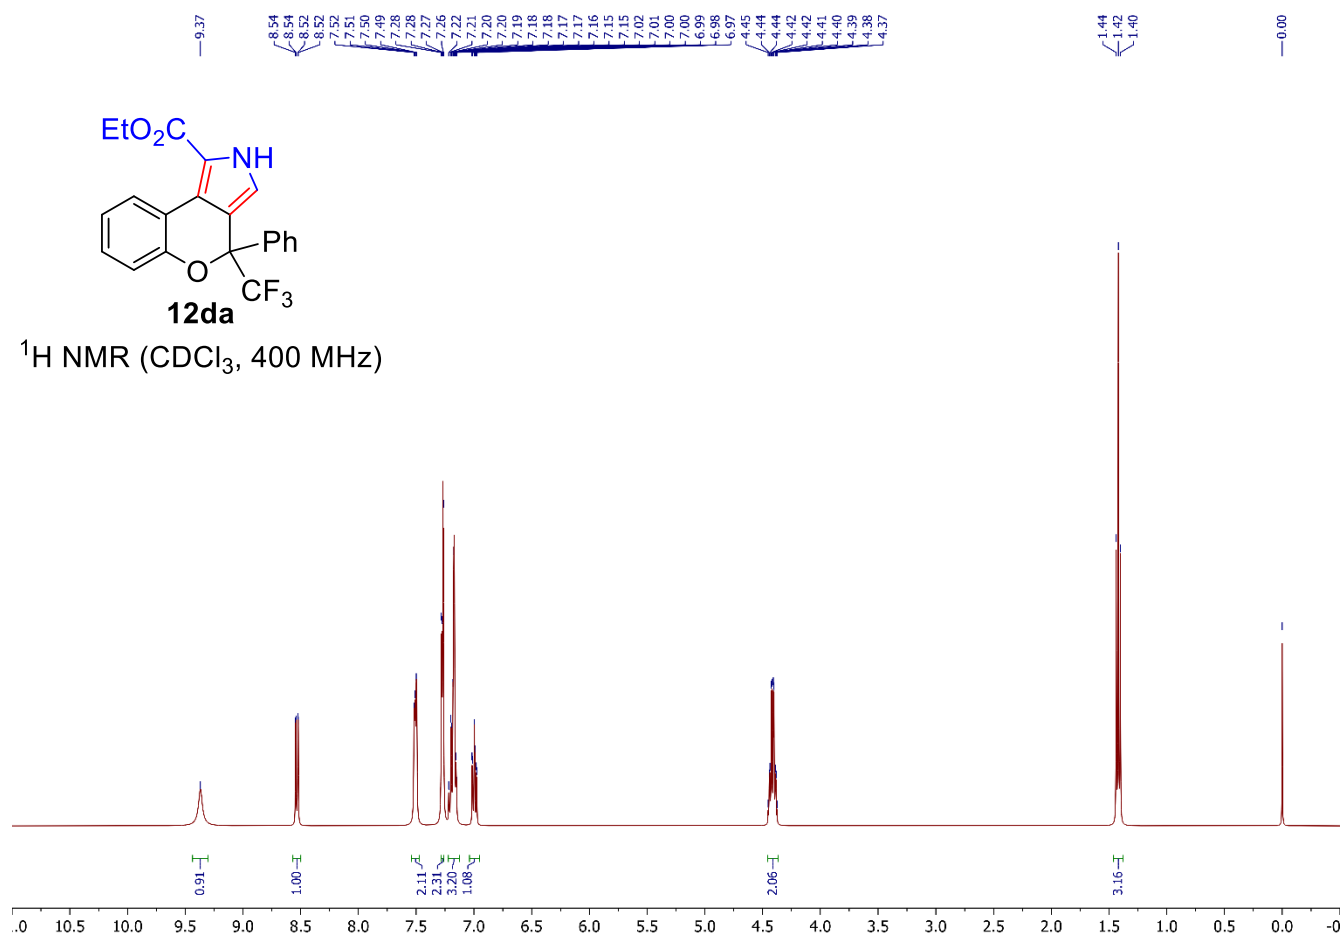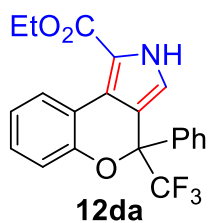

$^{13}\text{C}$  NMR ( $\text{CDCl}_3$ , 126 MHz)

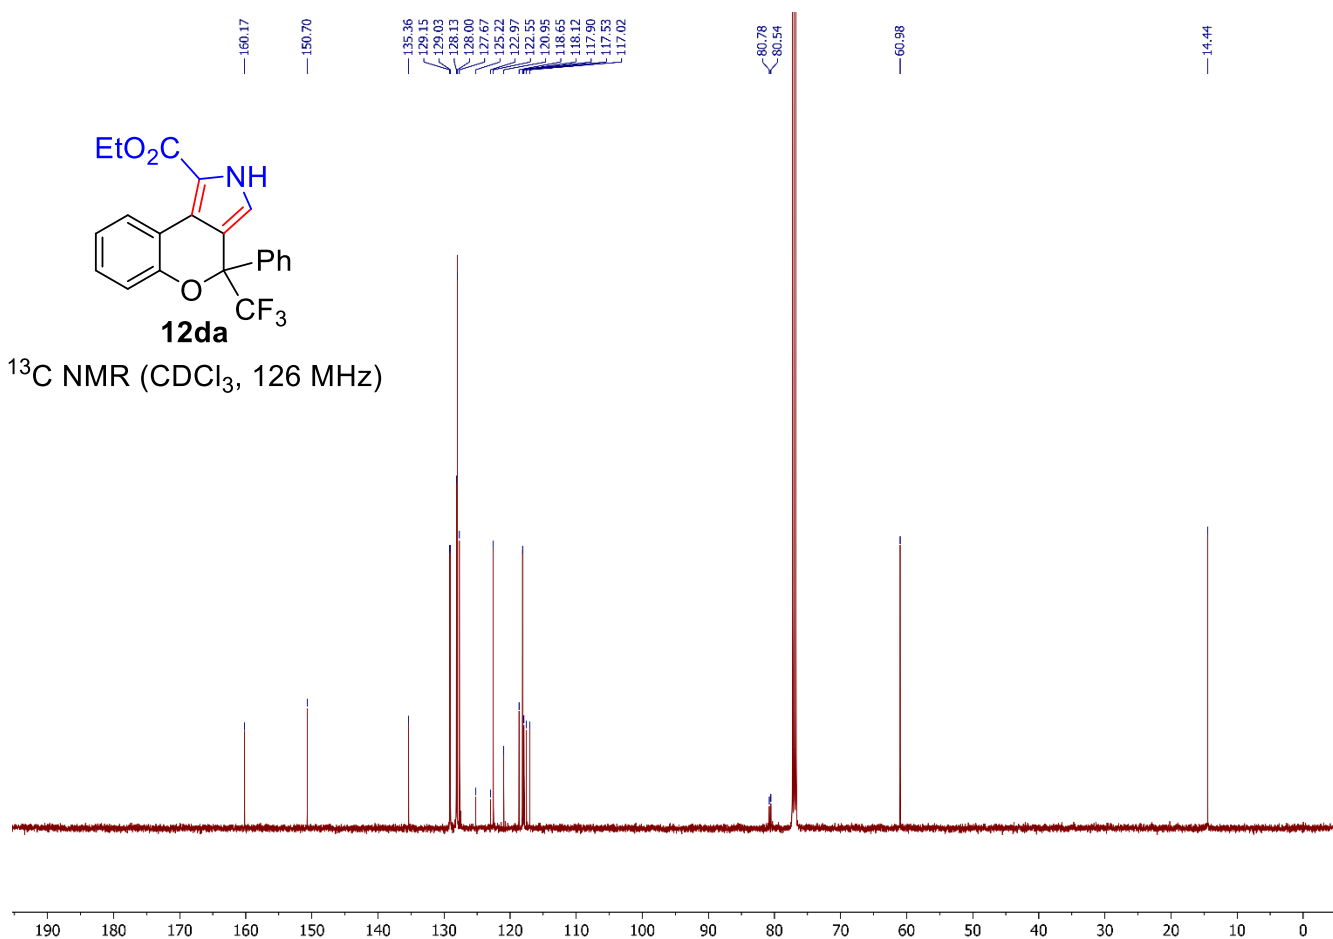

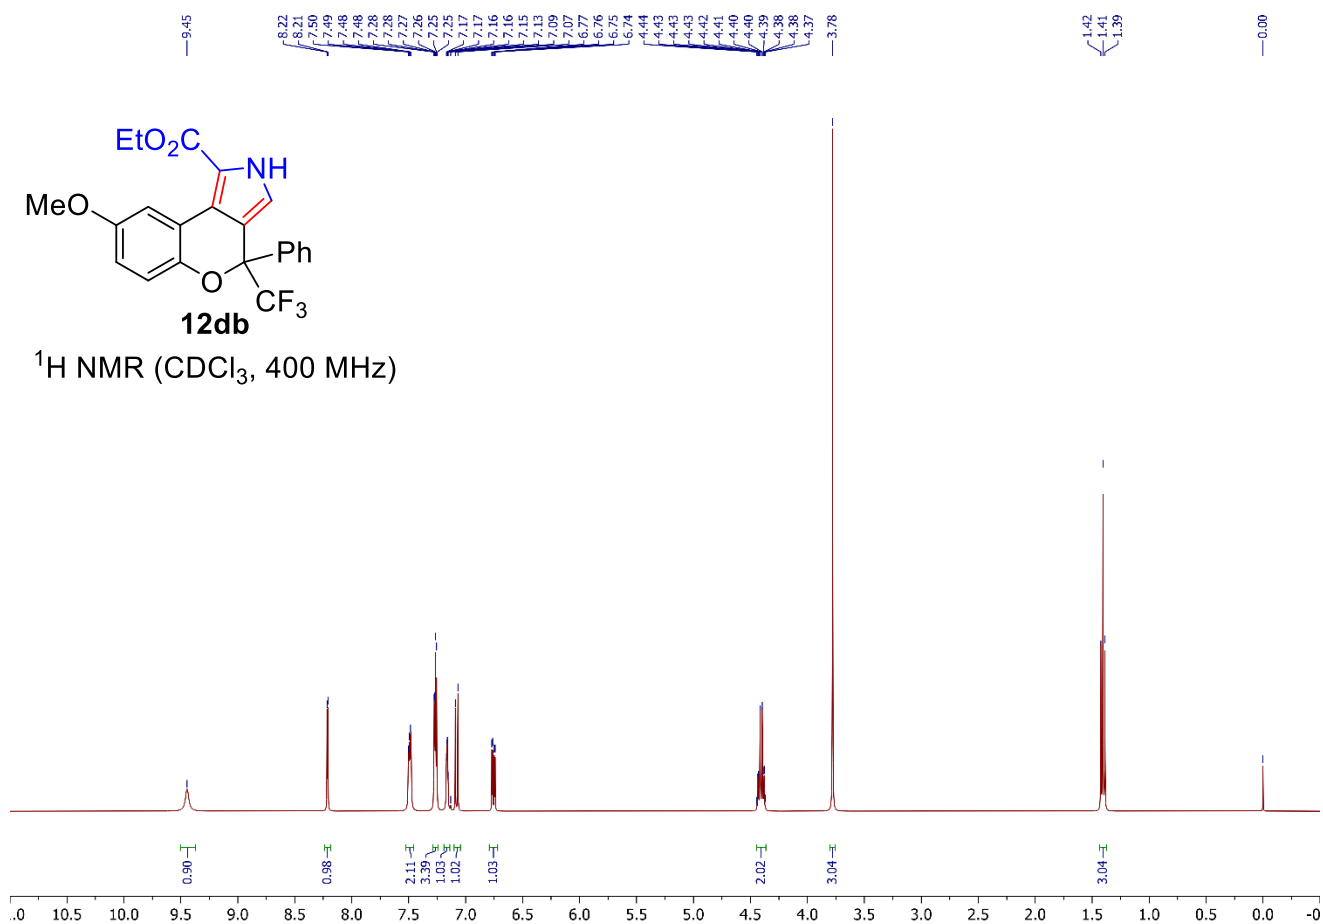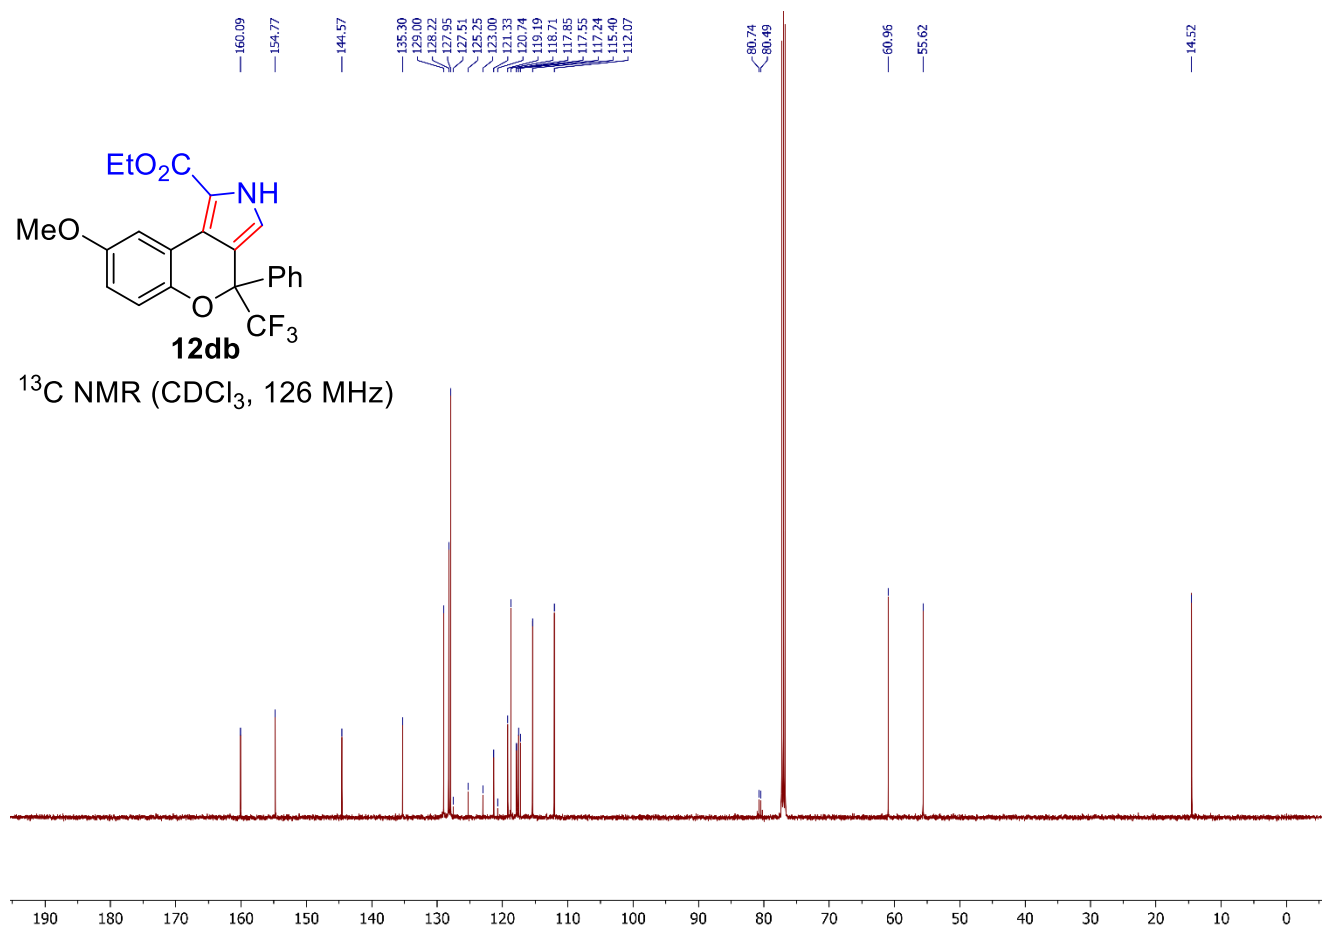



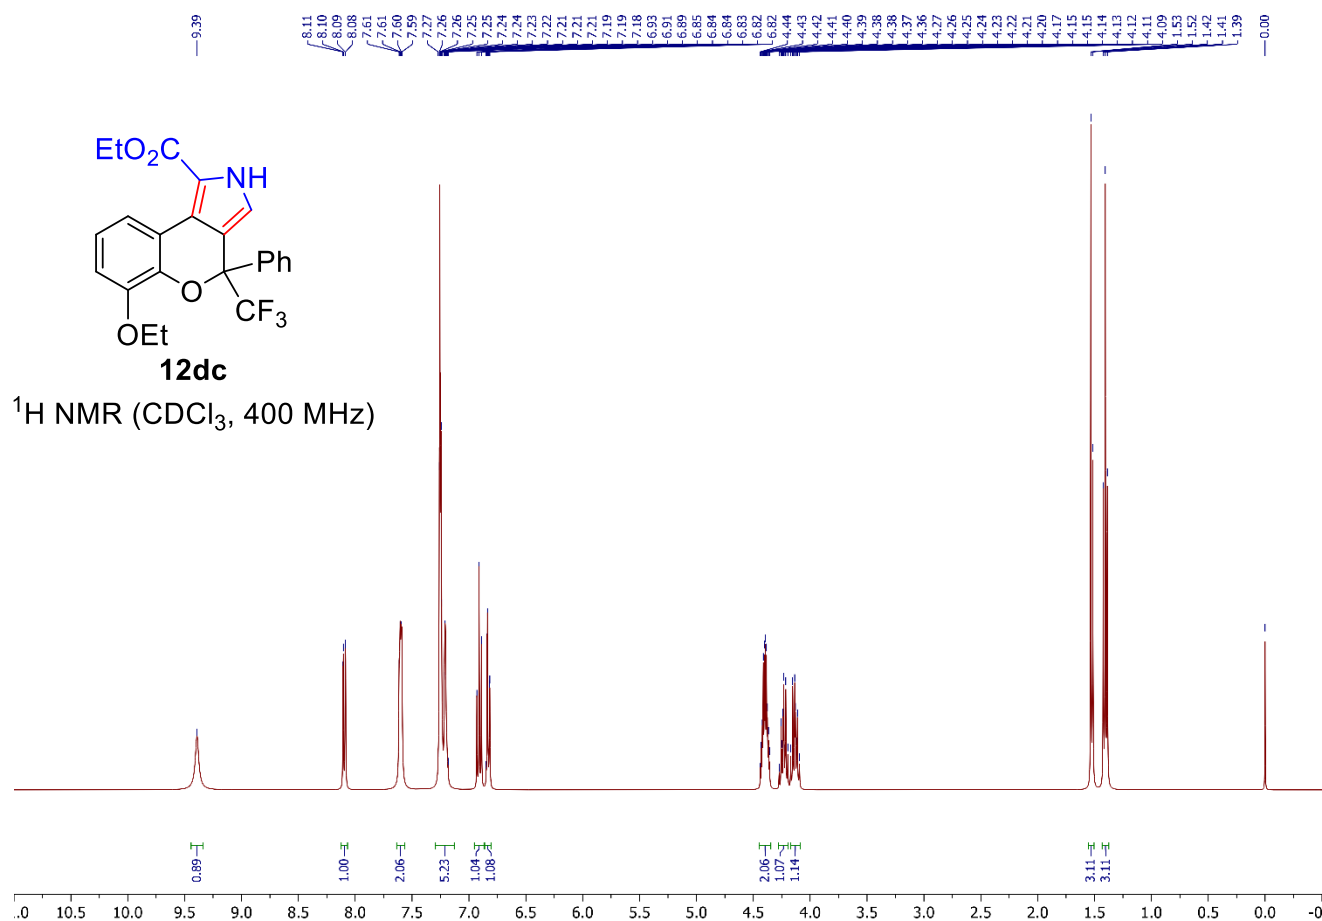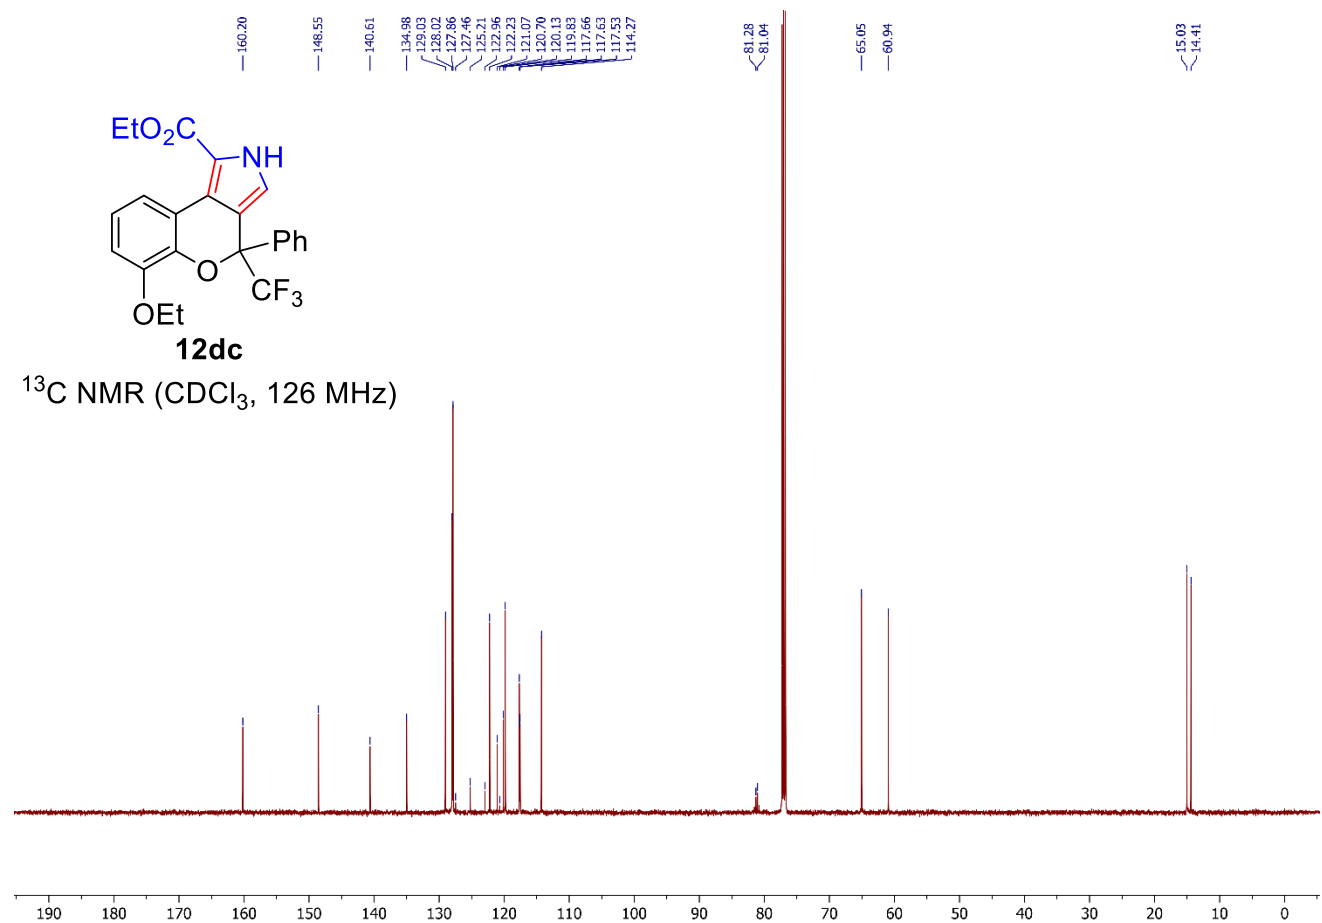

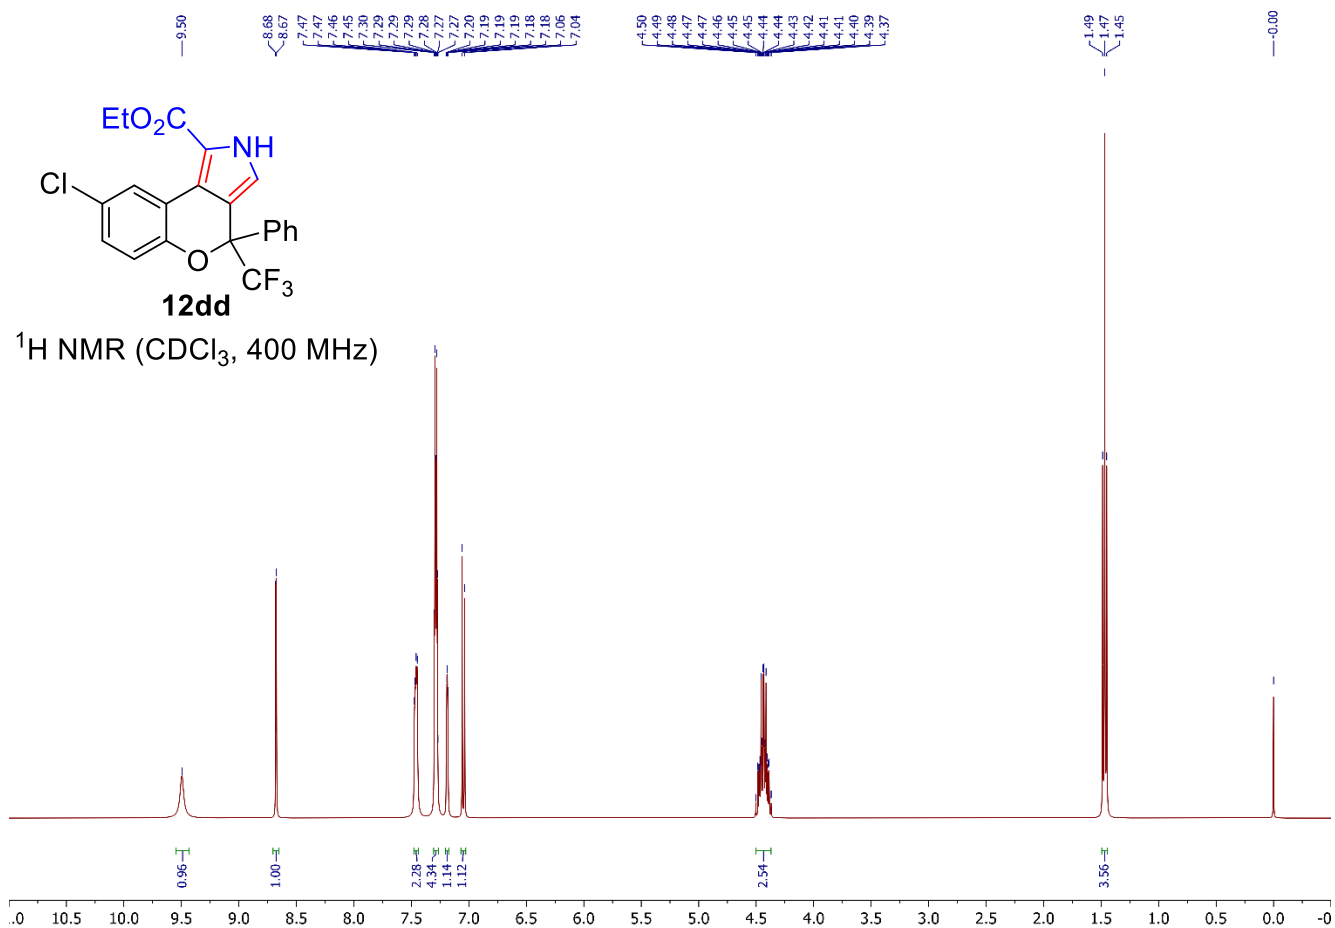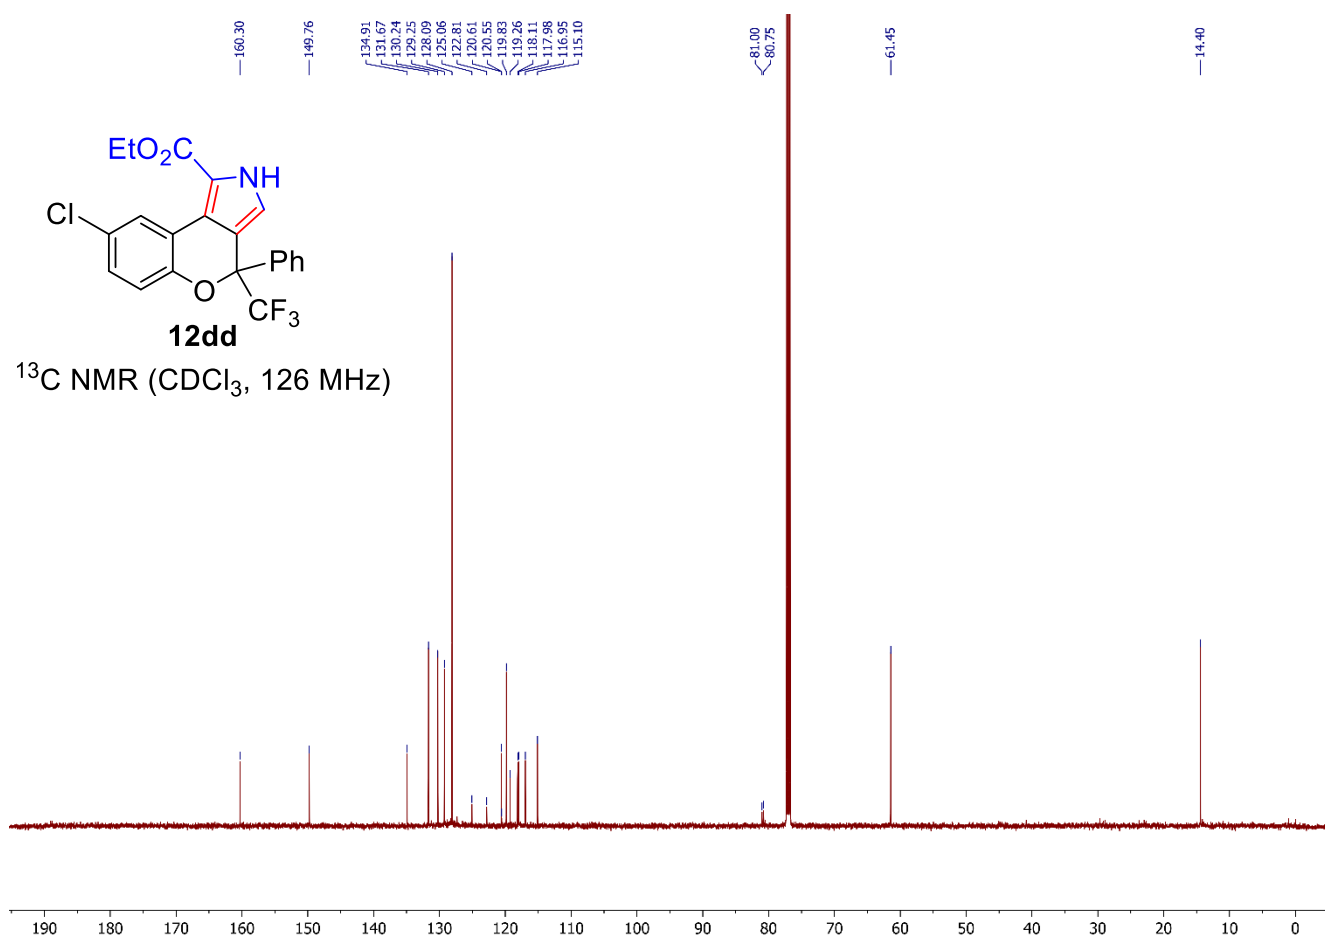

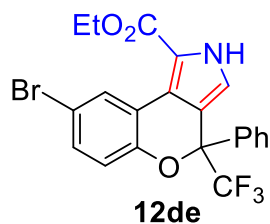

$^1\text{H}$  NMR ( $\text{CDCl}_3$ , 400 MHz)

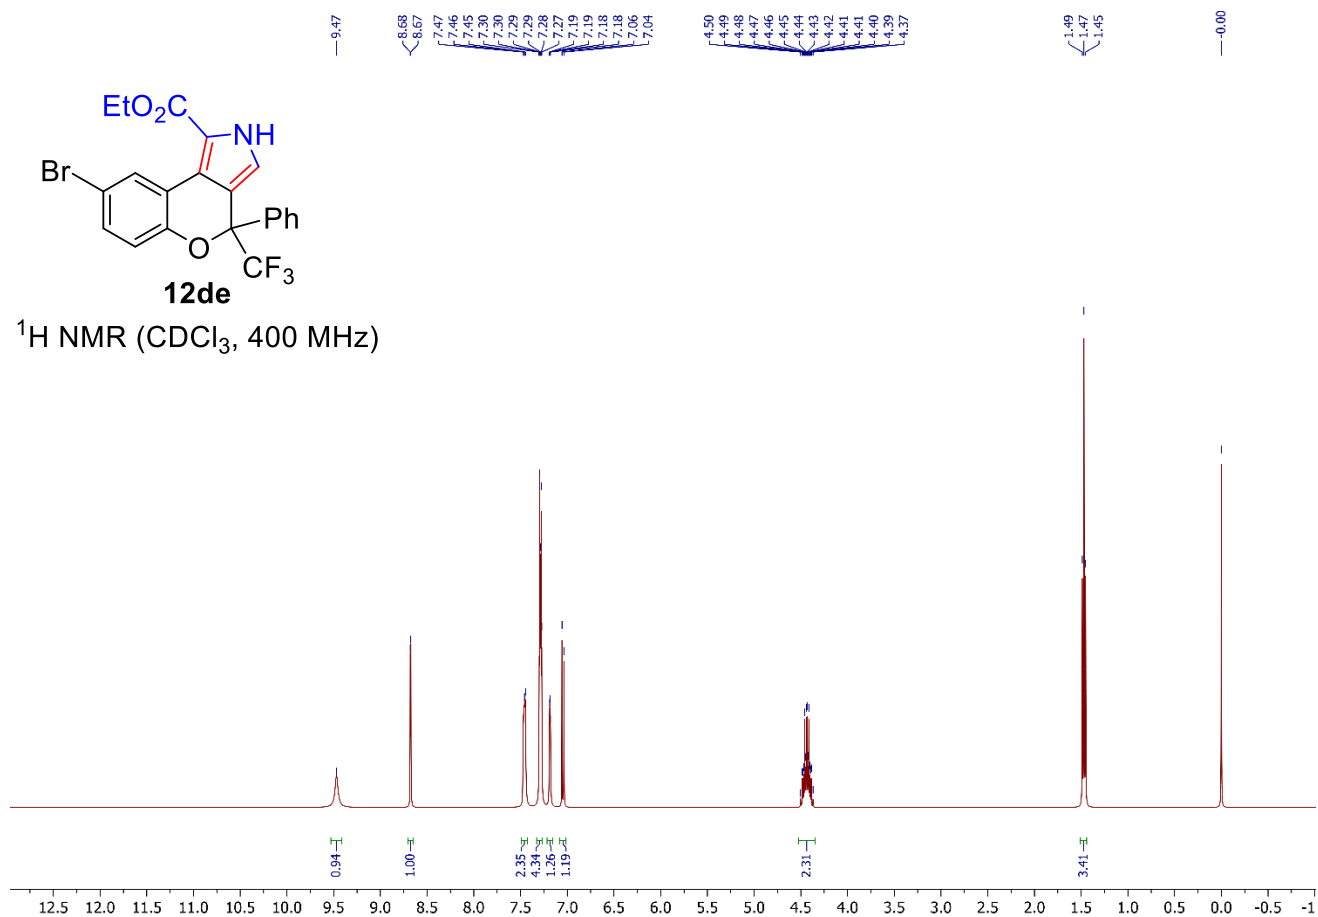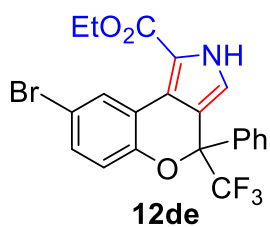

$^{13}\text{C}$  NMR ( $\text{CDCl}_3$ , 126 MHz)

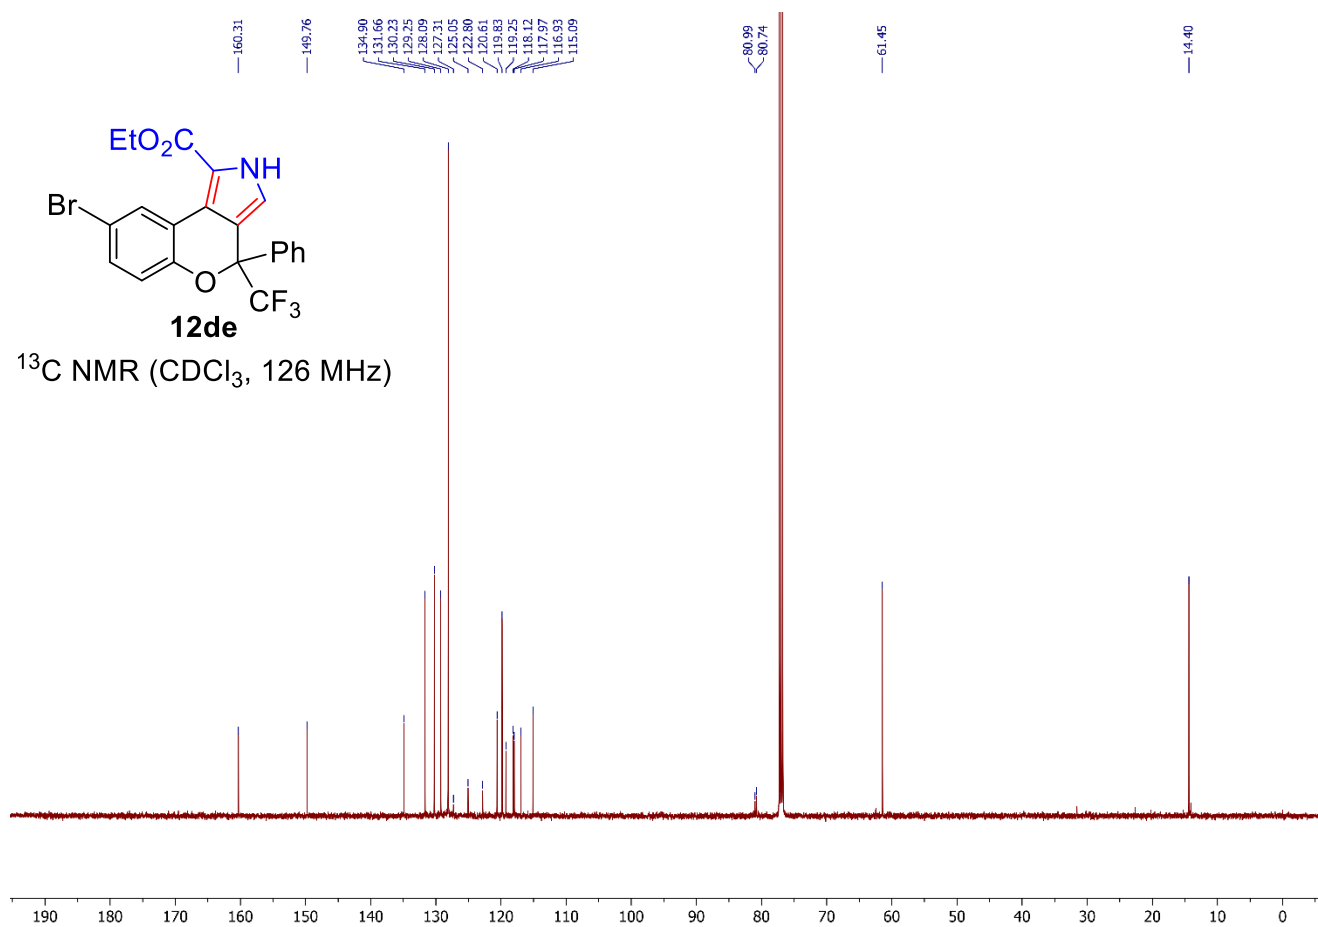

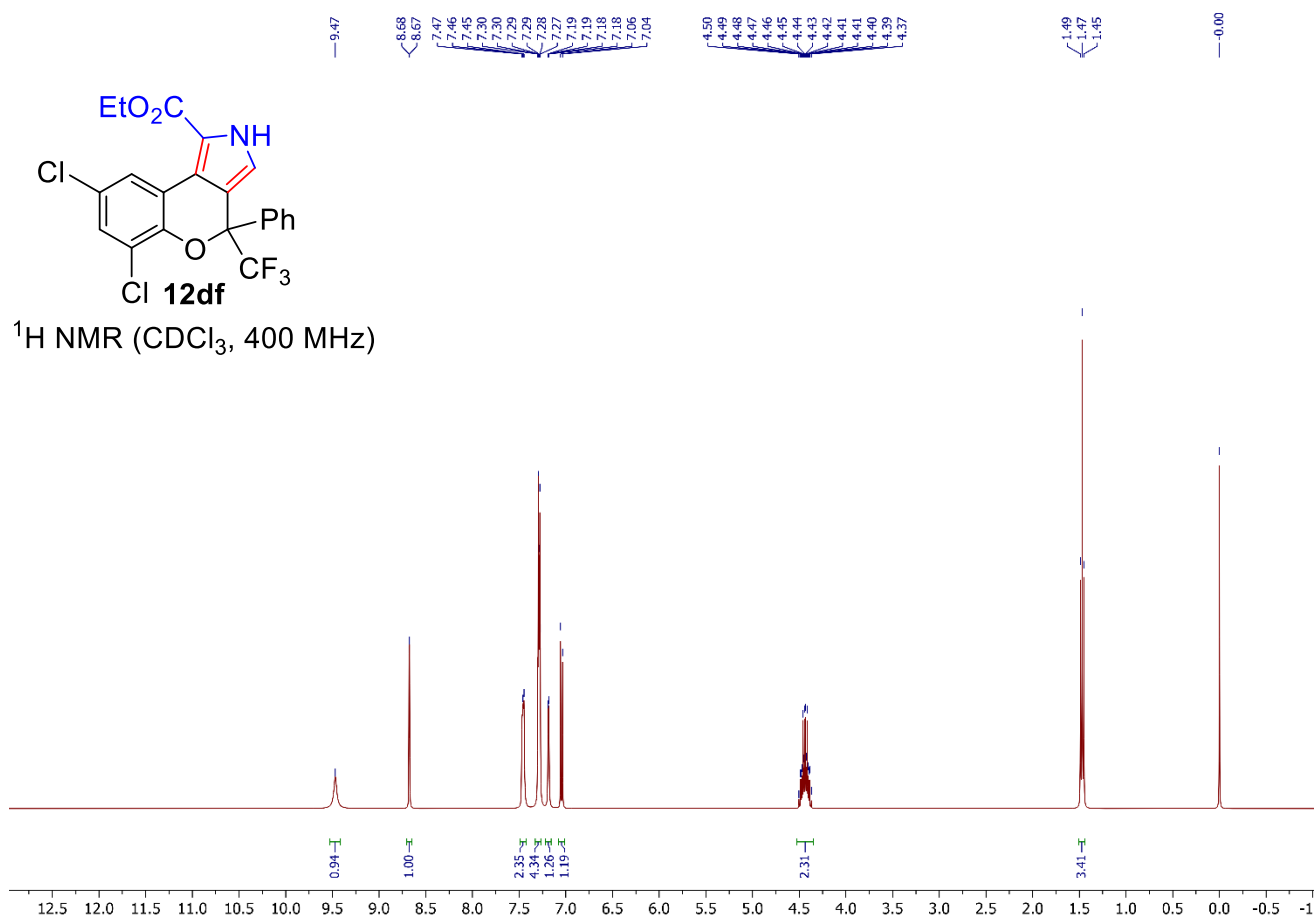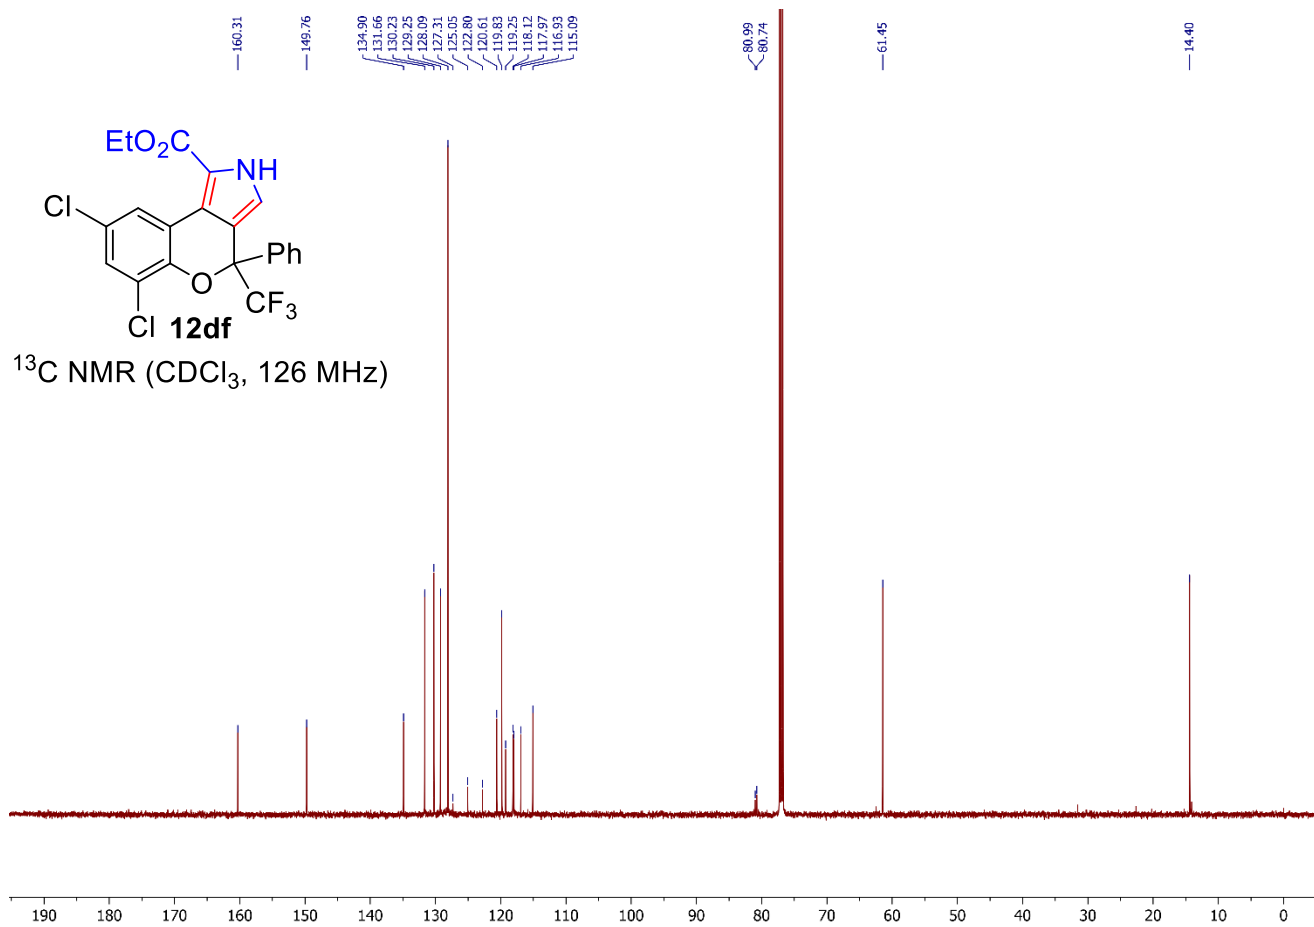

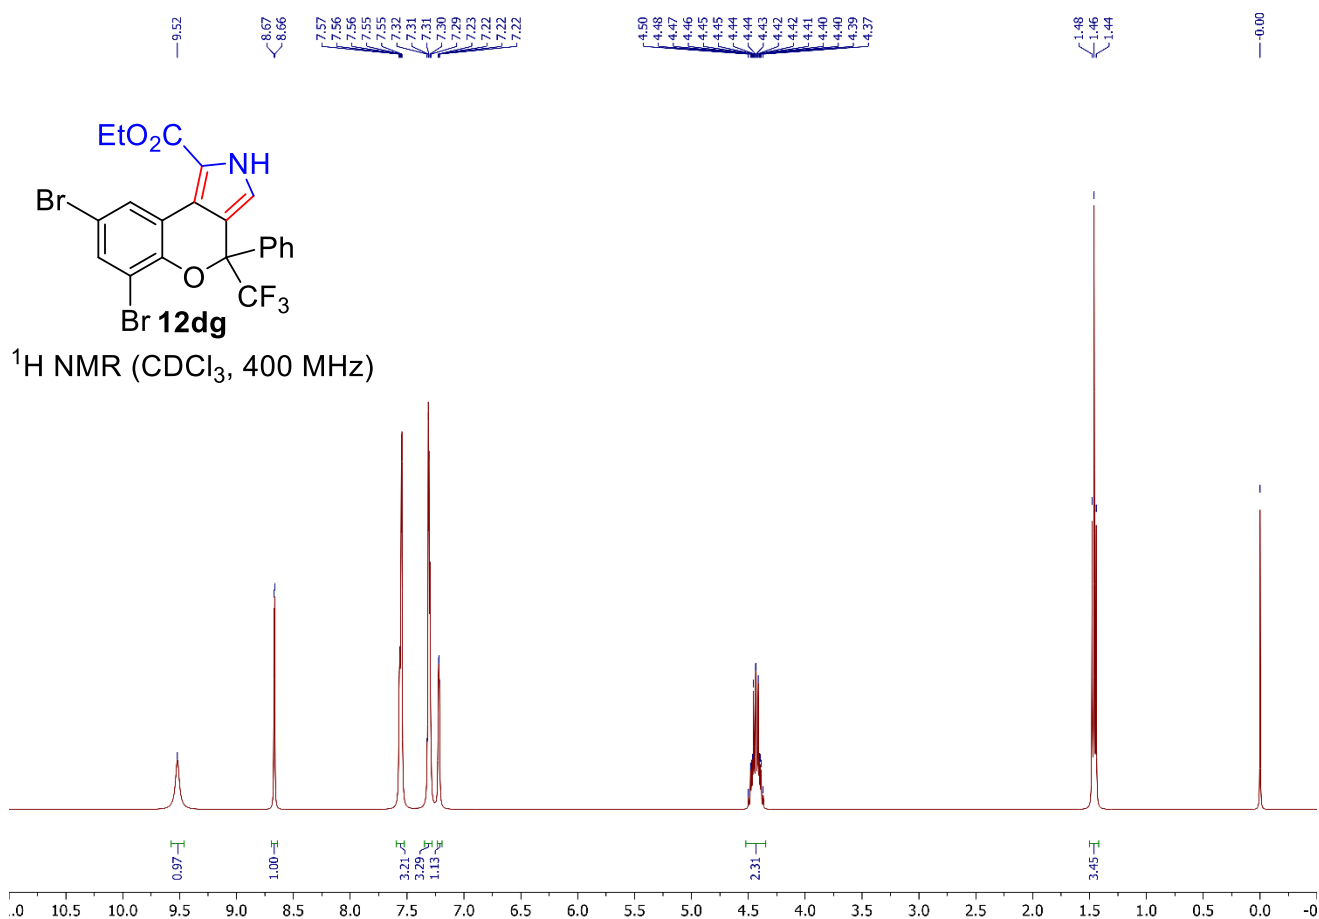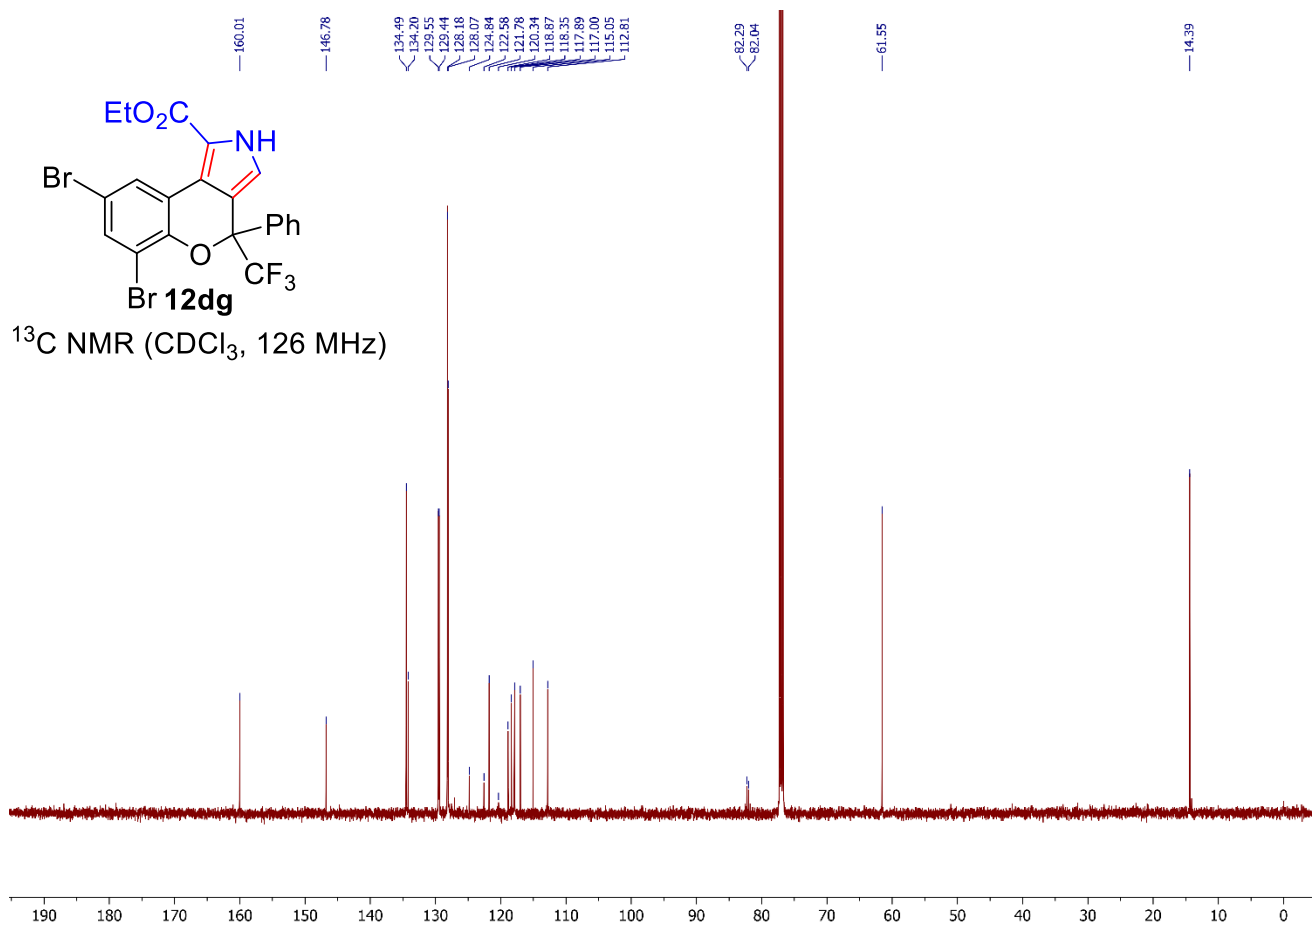

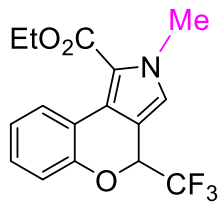

<sup>1</sup>H NMR (CDCl<sub>3</sub>, 400 MHz)

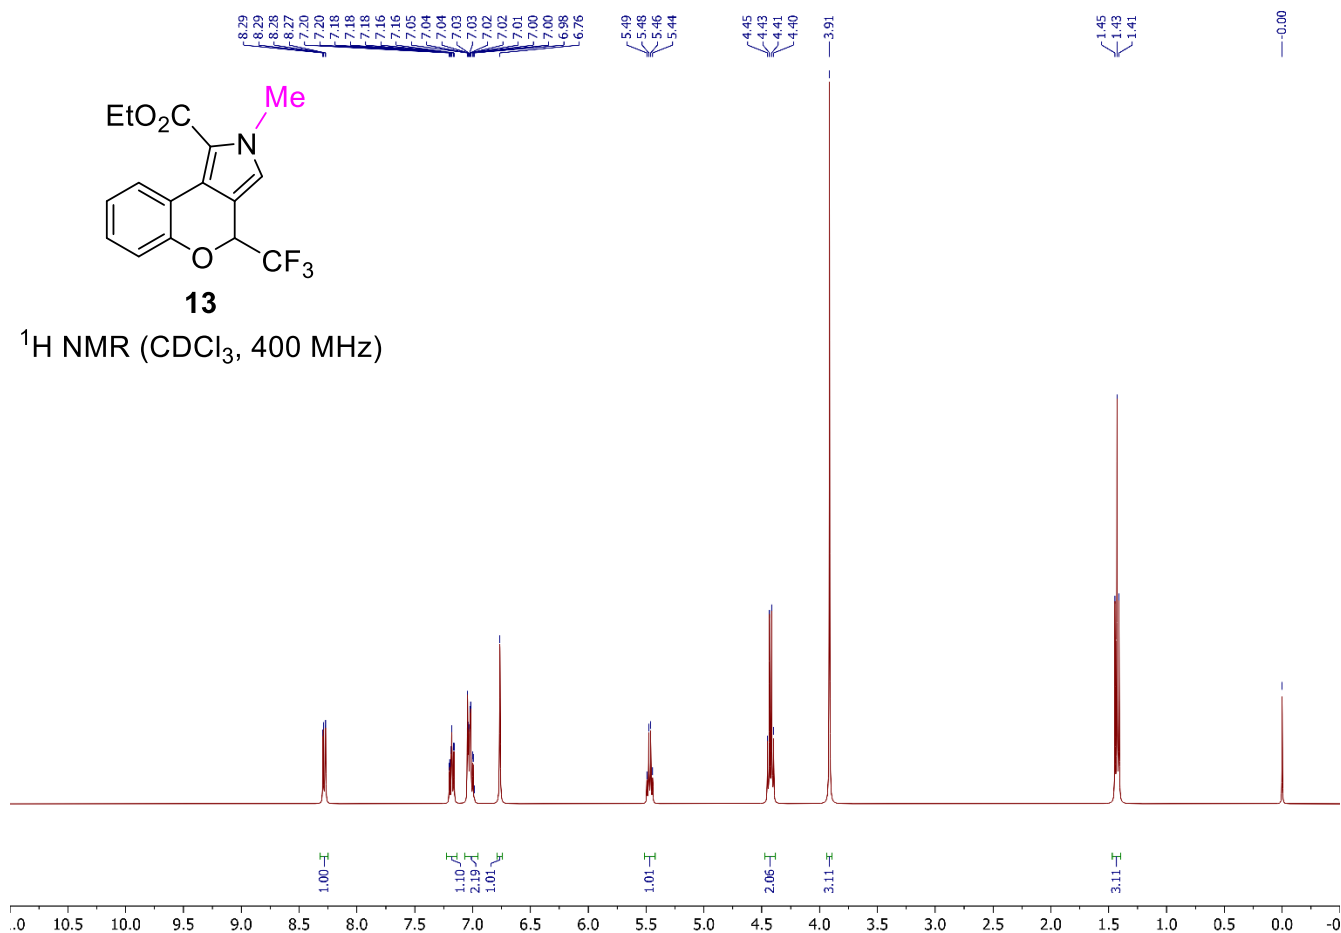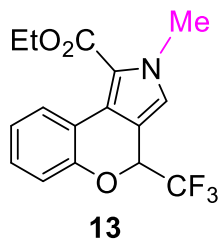

<sup>13</sup>C NMR (CDCl<sub>3</sub>, 126 MHz)

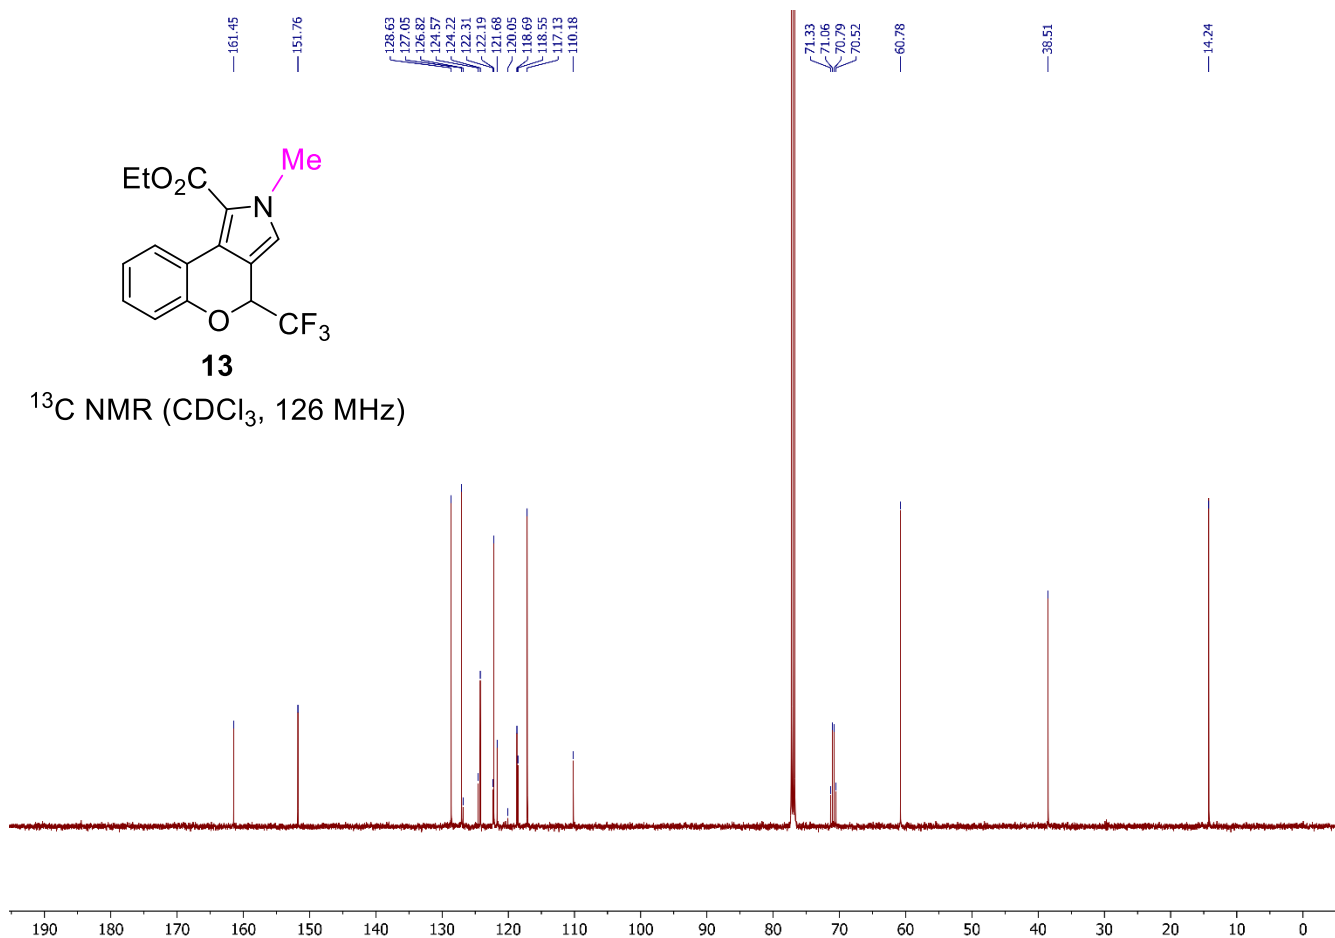

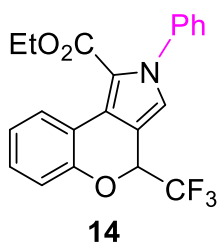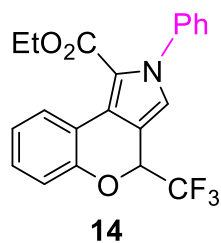

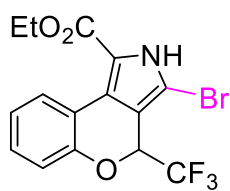

**15**

$^1\text{H}$  NMR ( $\text{CDCl}_3$ , 400 MHz)

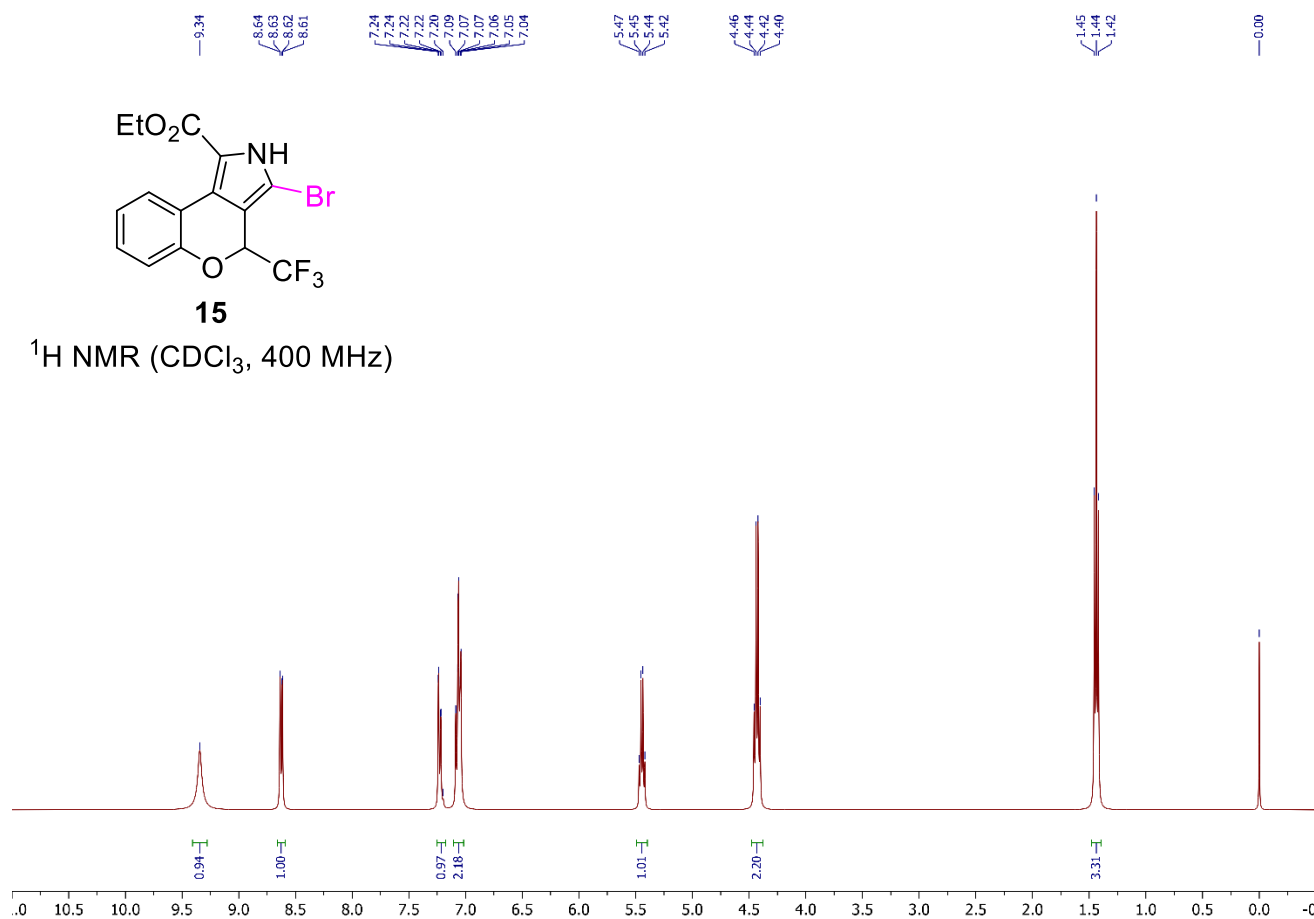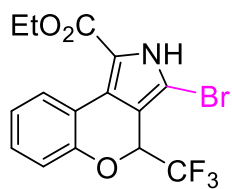

**15**

$^{13}\text{C}$  NMR ( $\text{CDCl}_3$ , 126 MHz)

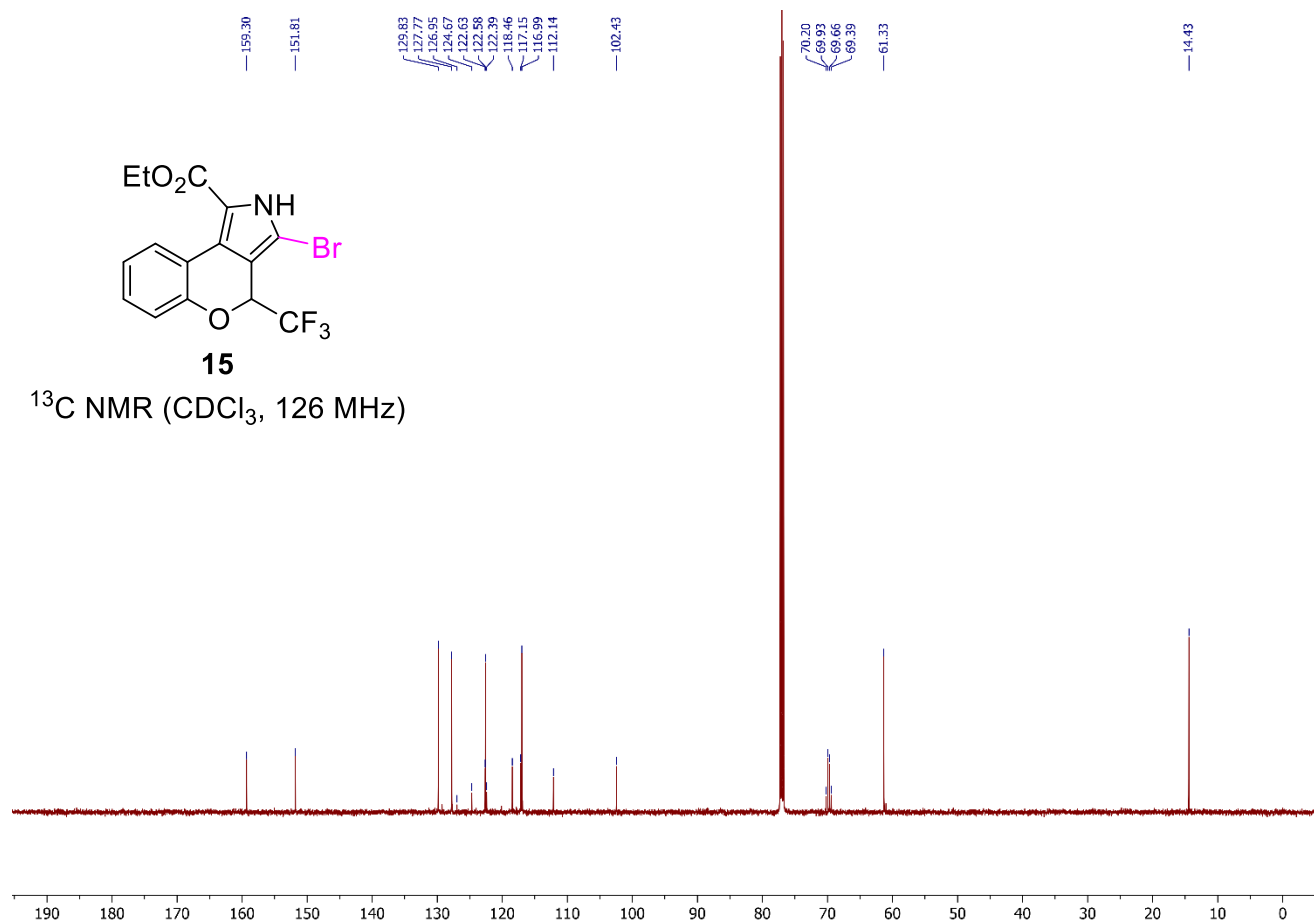

Supplement: s1 [file s1]
